# Supplementary material
Source: PubMed Central journal article supplement (PMC5596349)

**Chromosome 1**

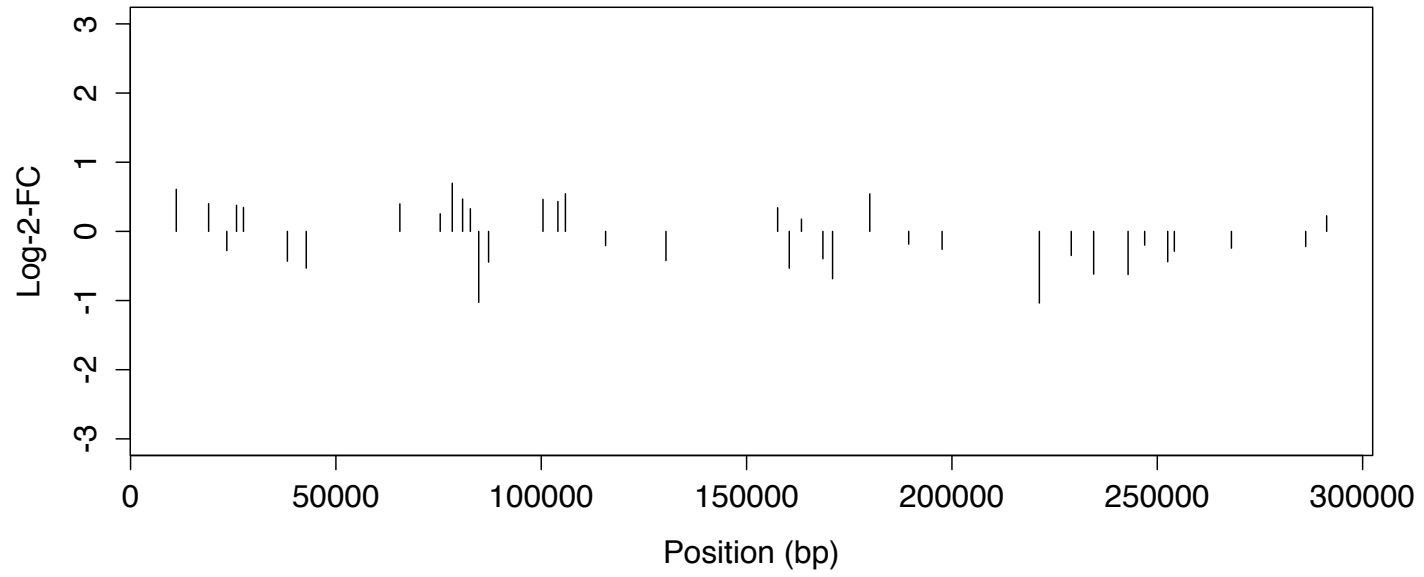

**Chromosome 1**

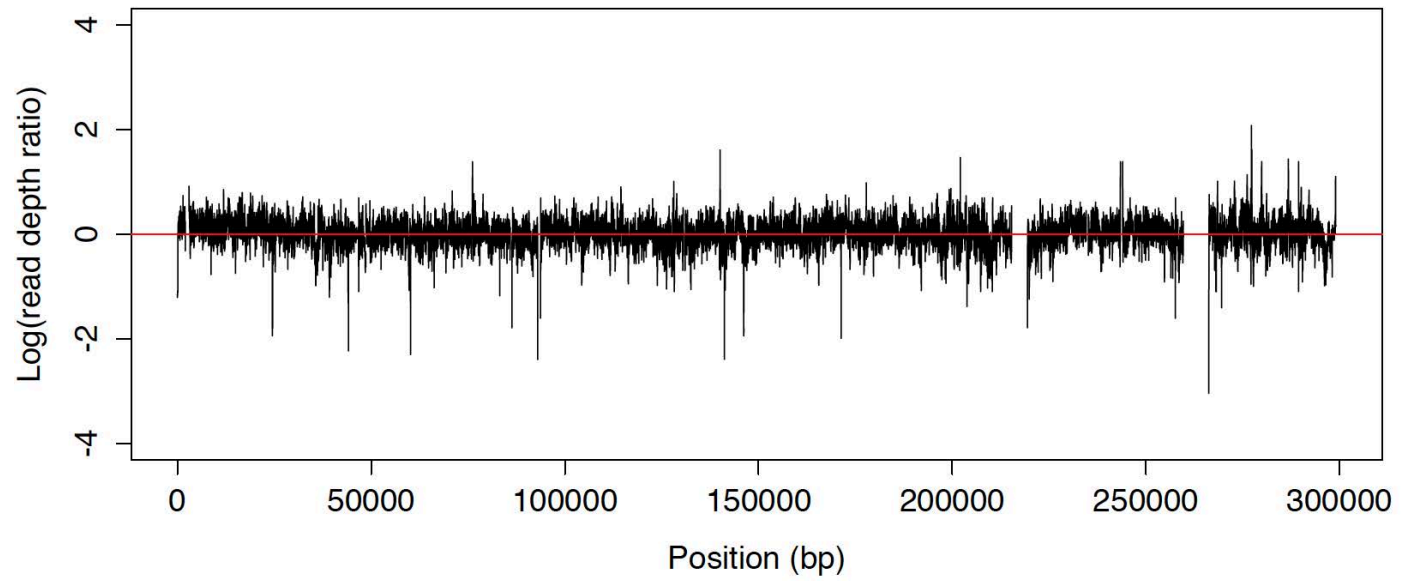

### Chromosome 2

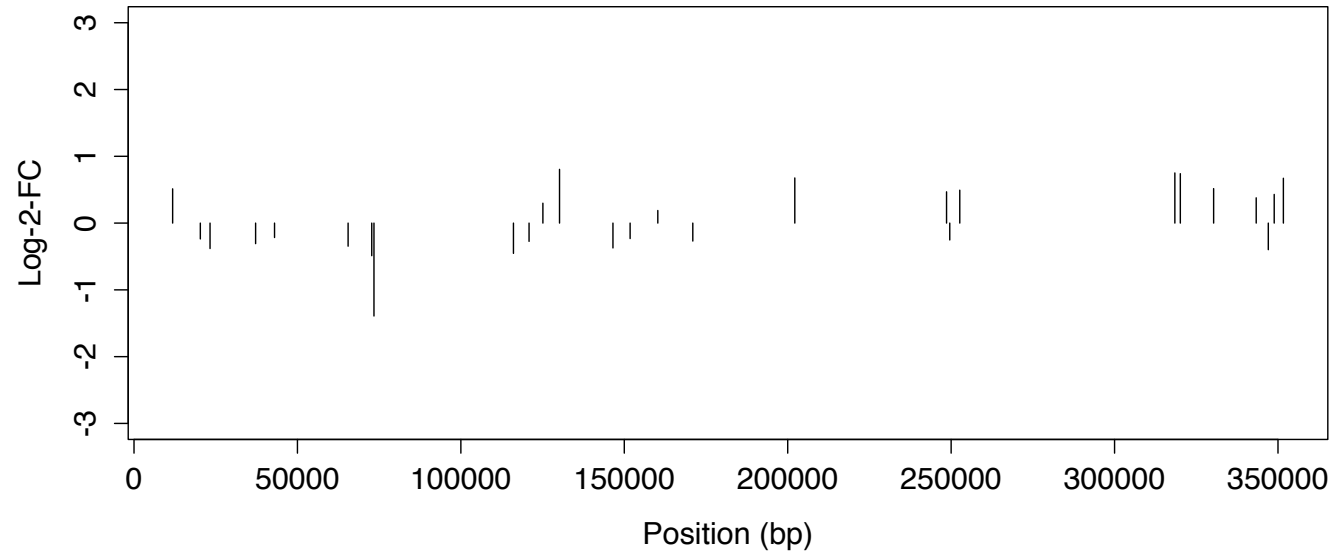

### Chromosome 2

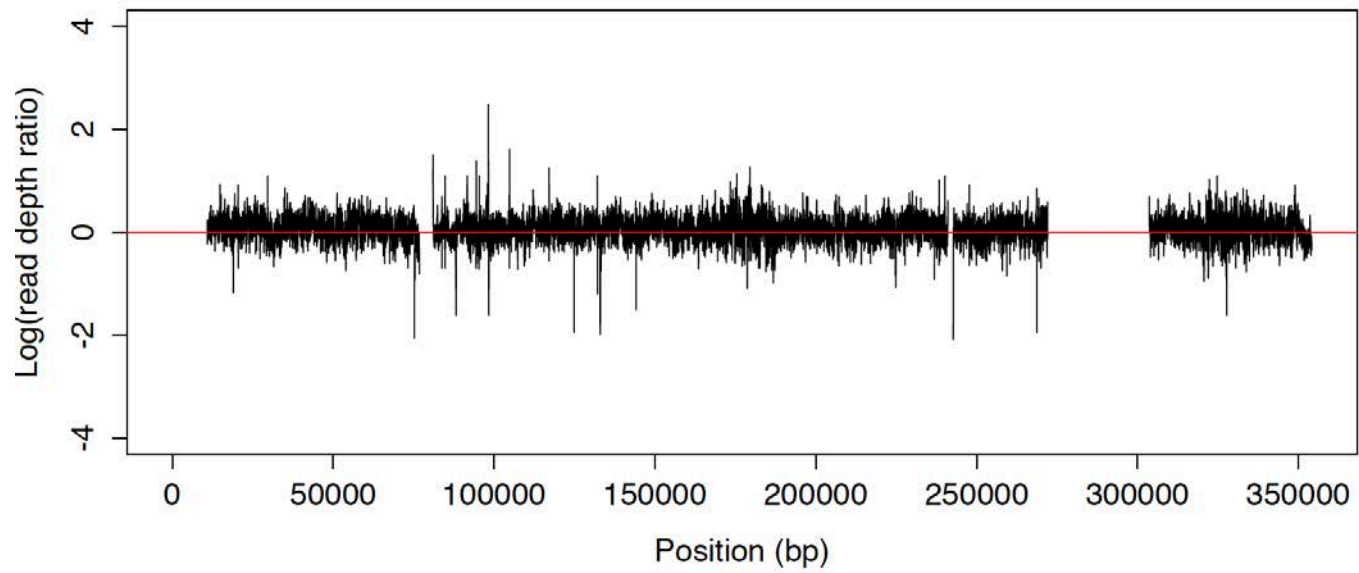

### Chromosome 3

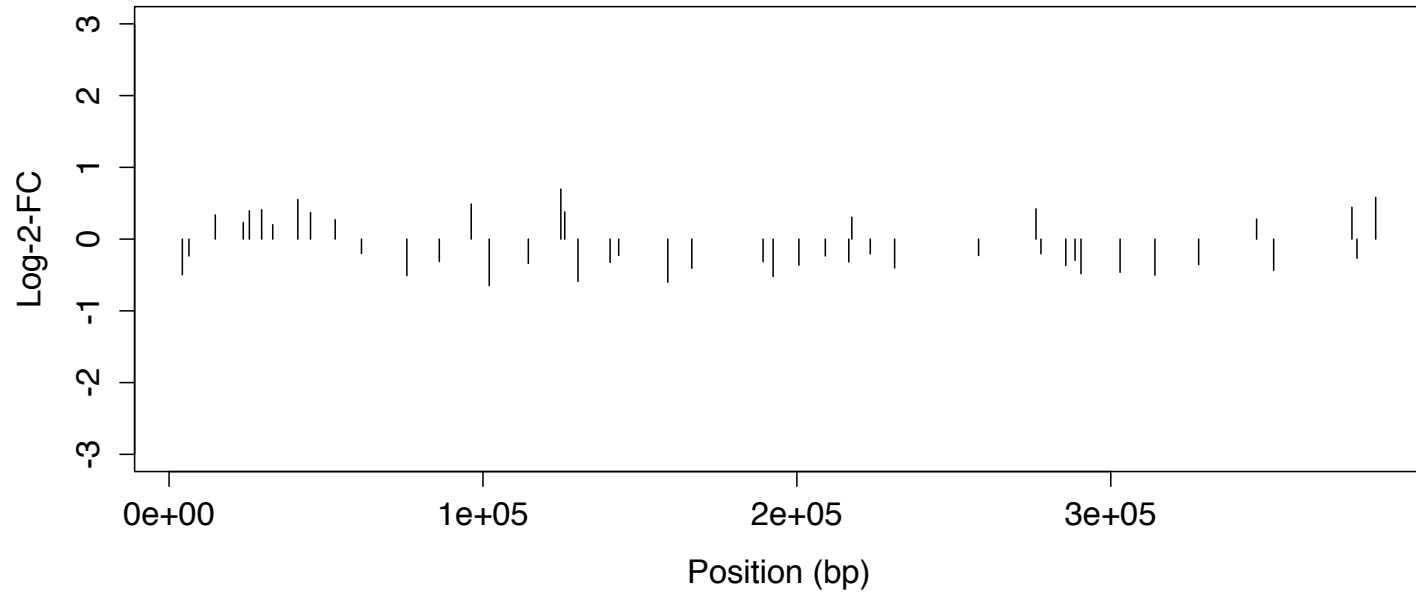

### Chromosome 3

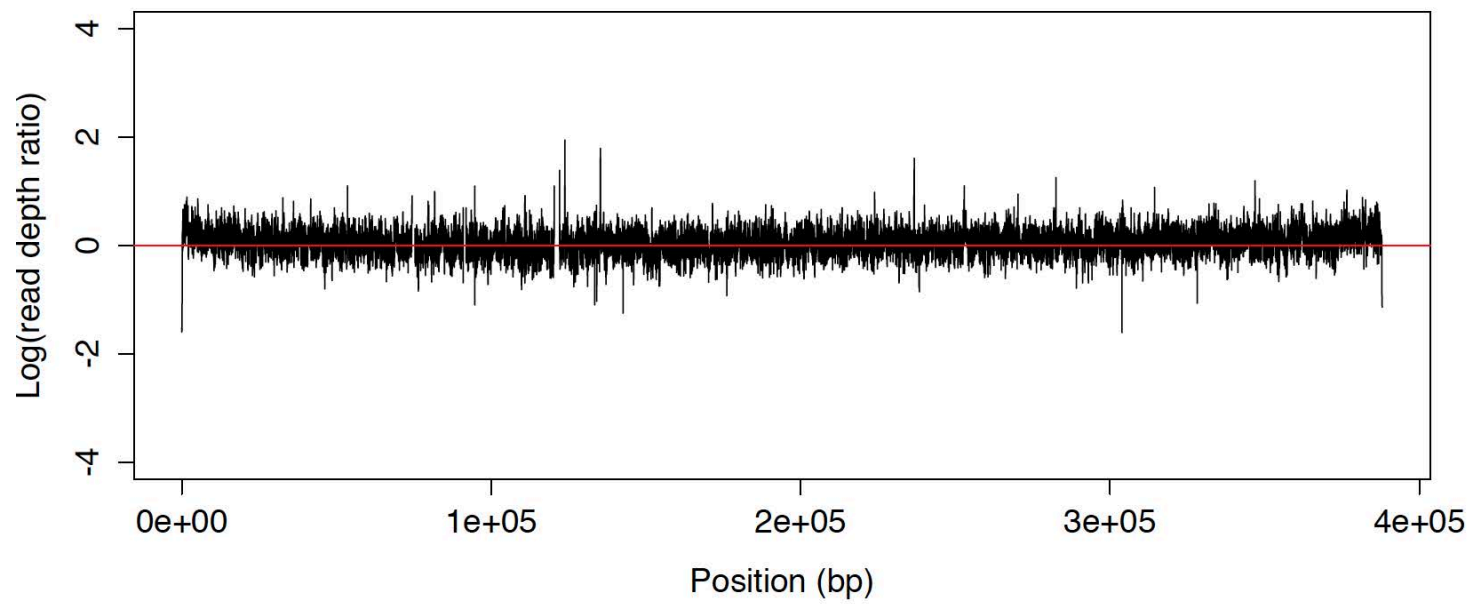

### Chromosome 4

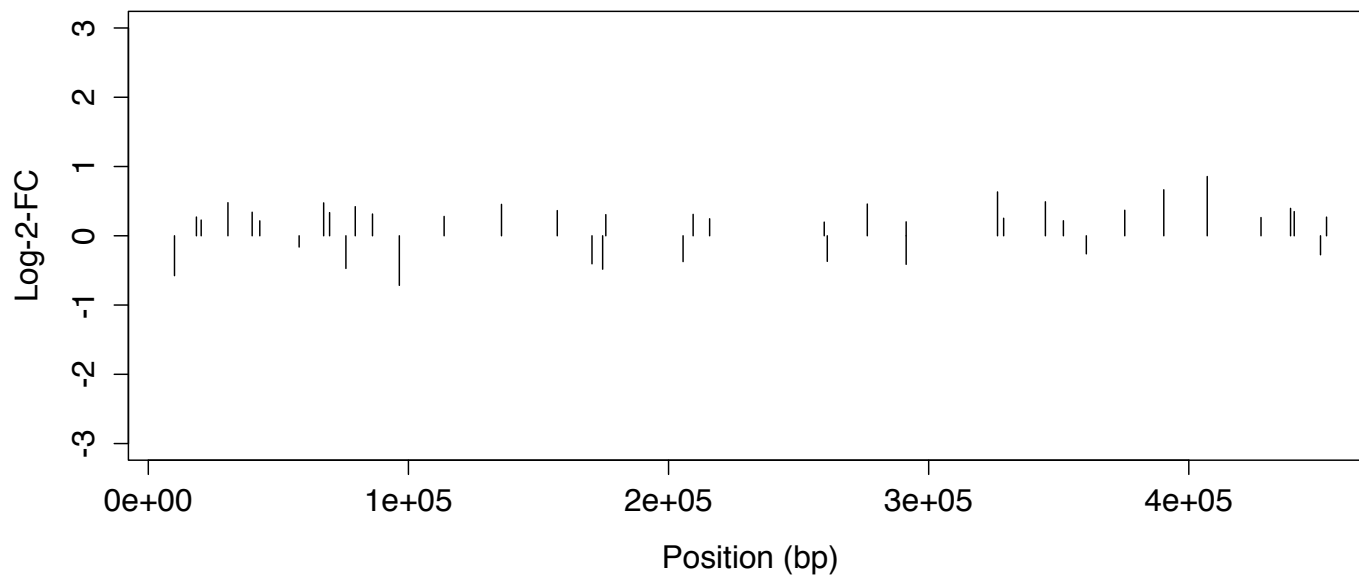

### Chromosome 4

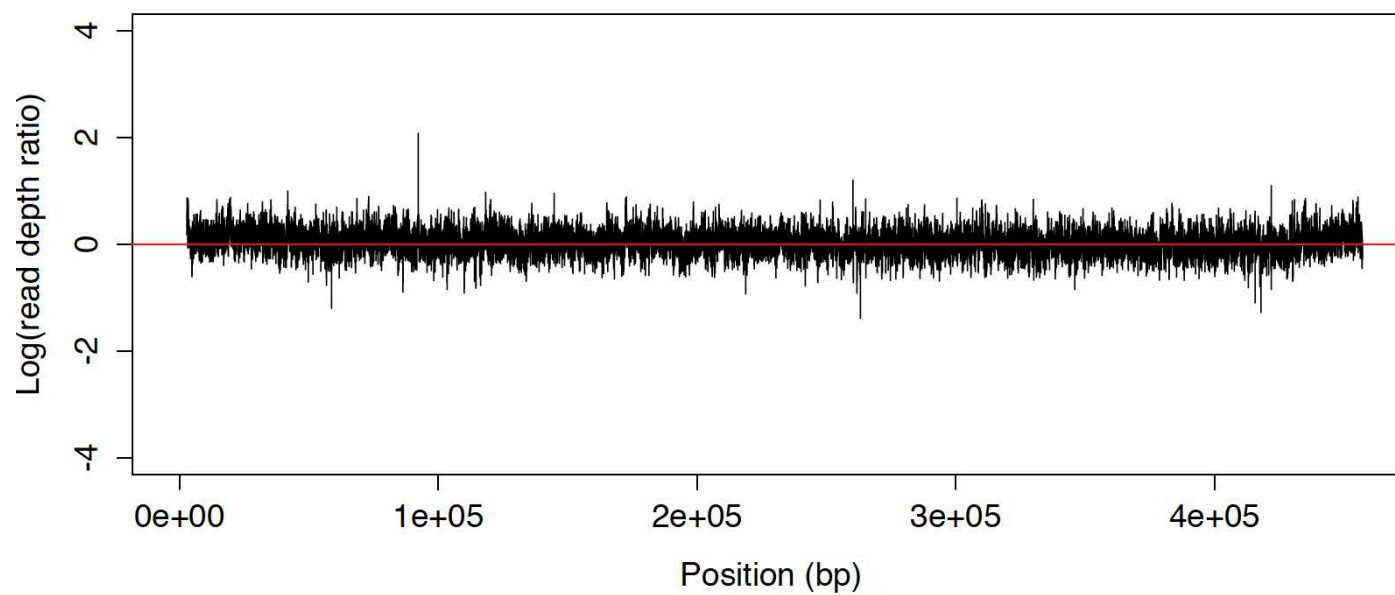

### Chromosome 5

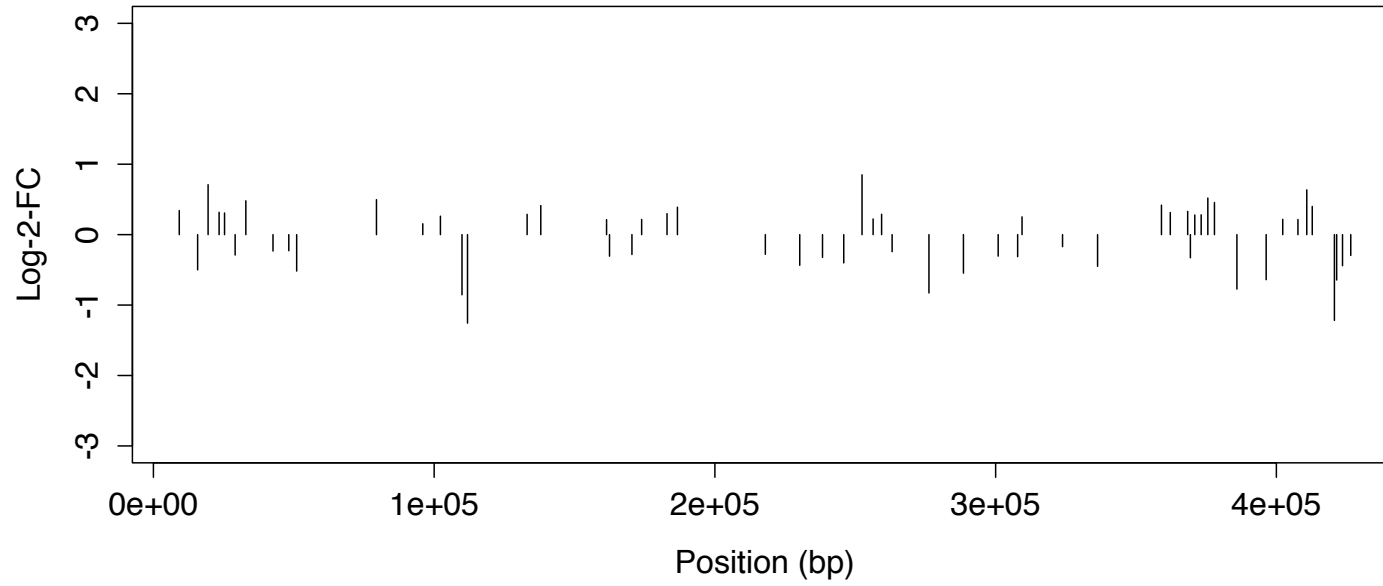

### Chromosome 5

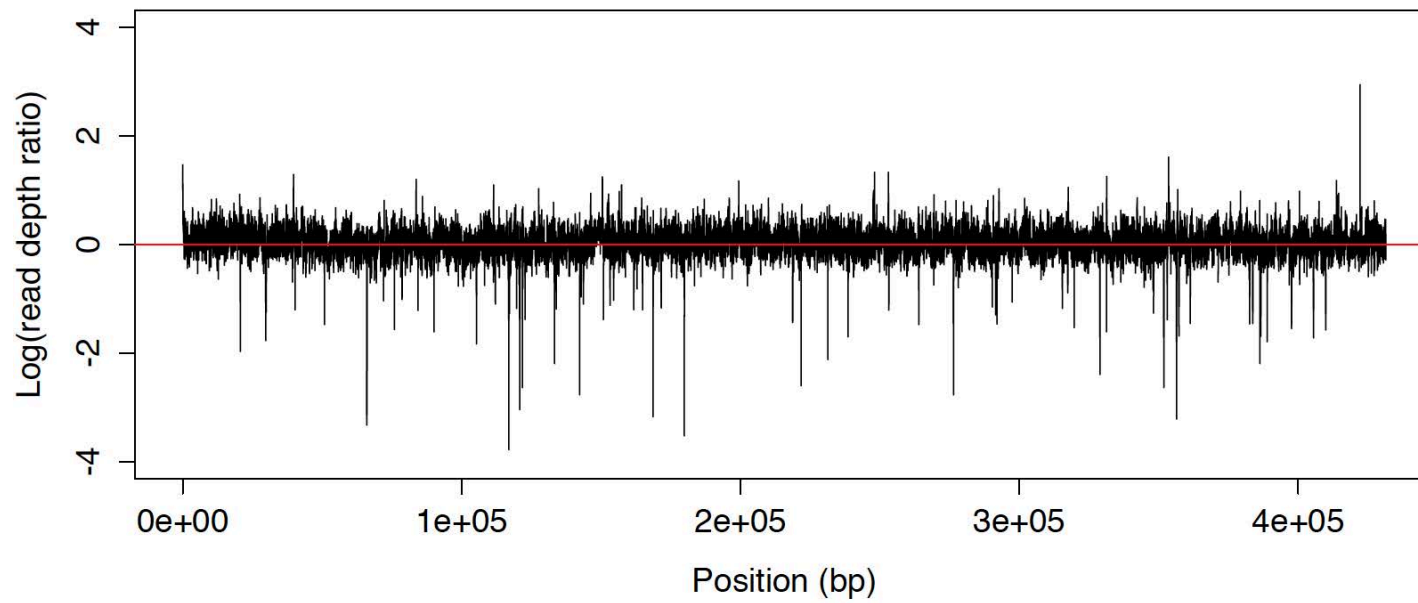

### Chromosome 6

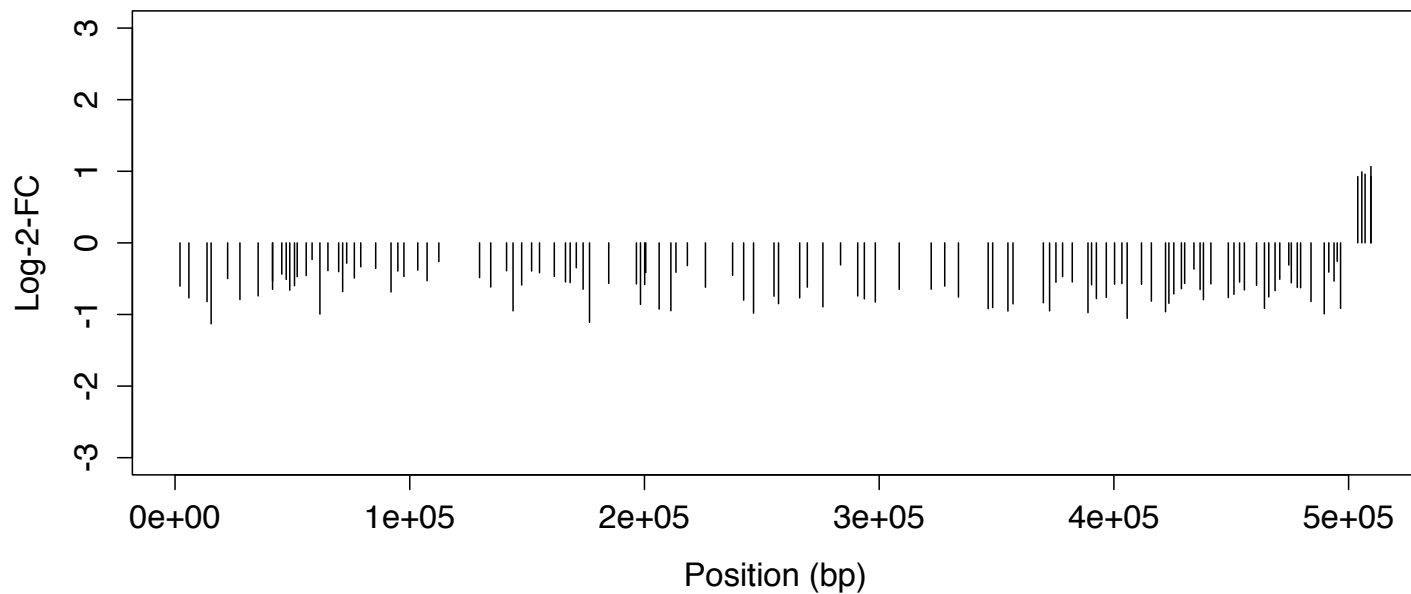

### Chromosome 6

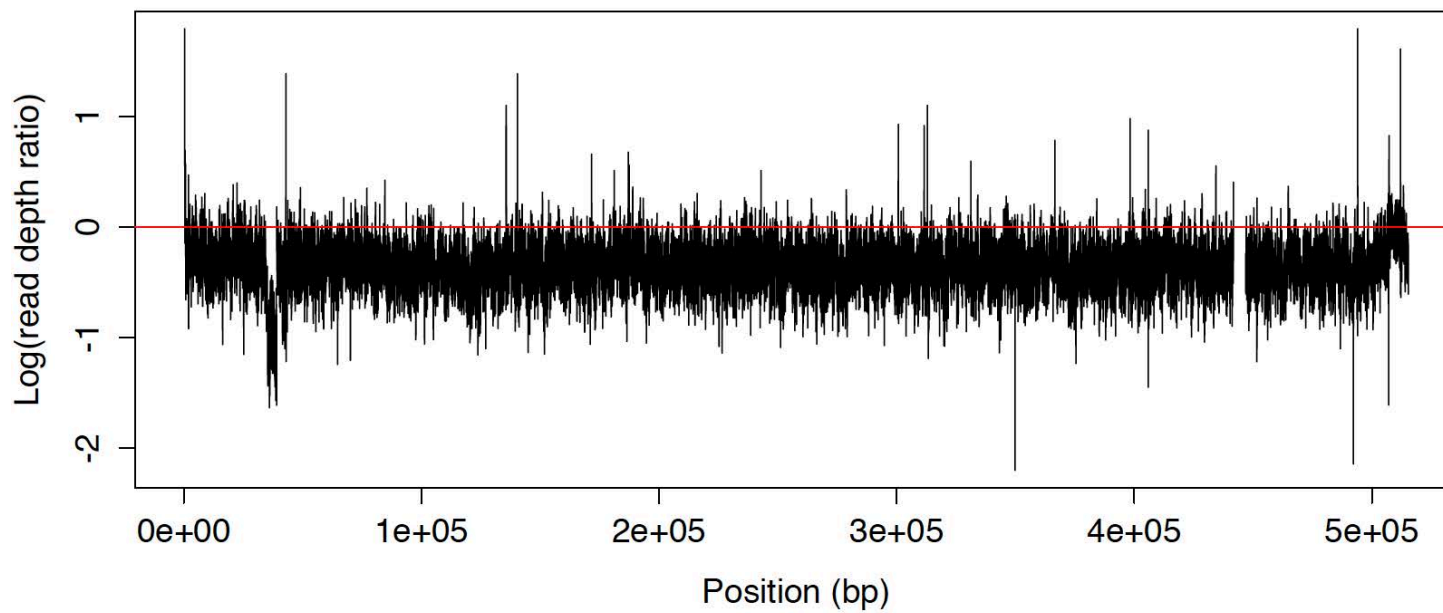

### Chromosome 7

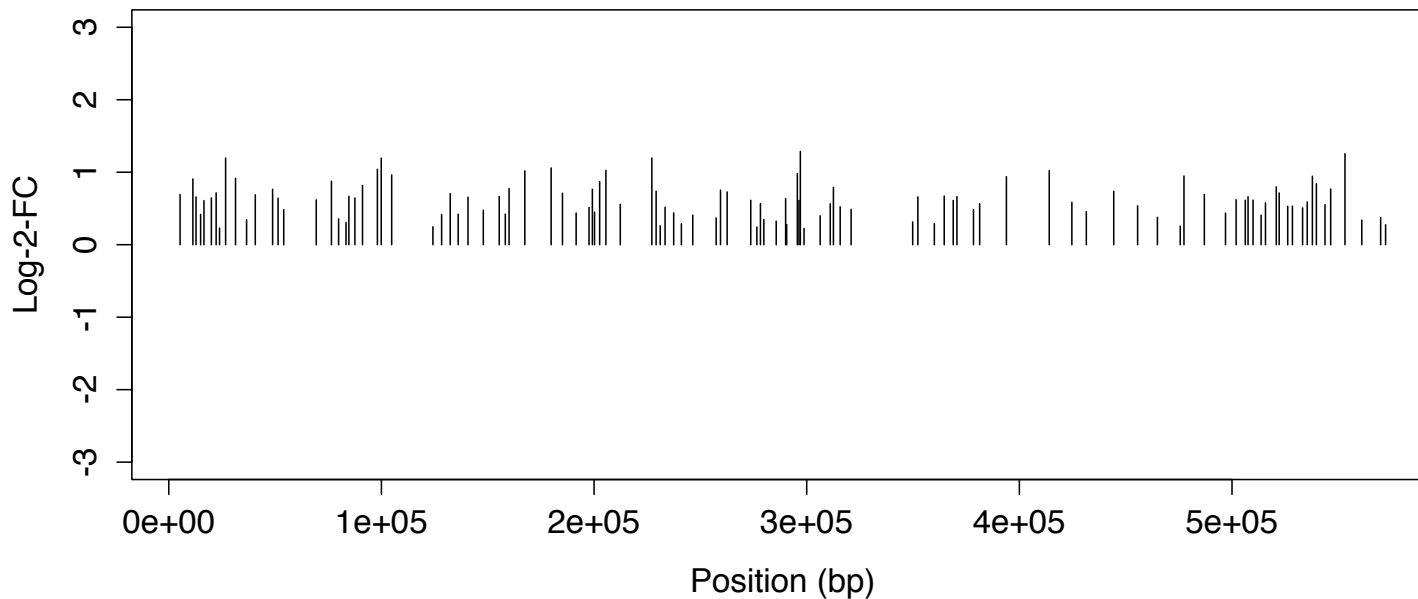

### Chromosome 7

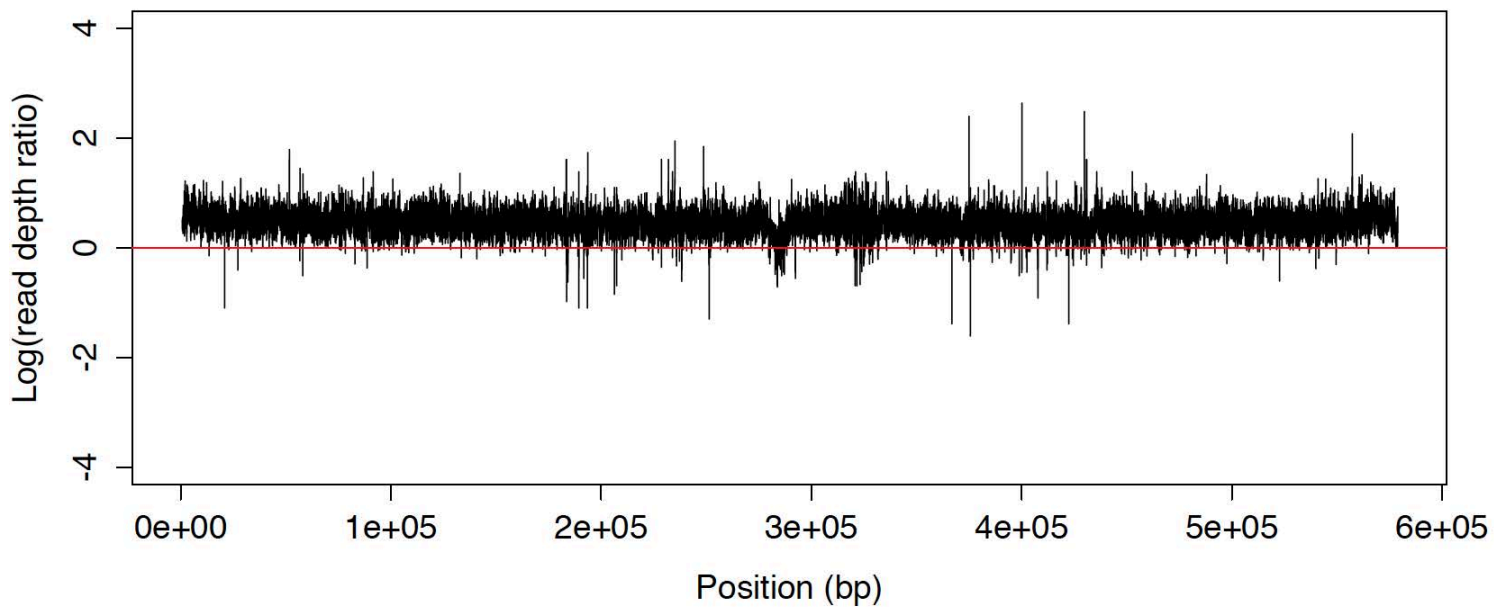

### Chromosome 8

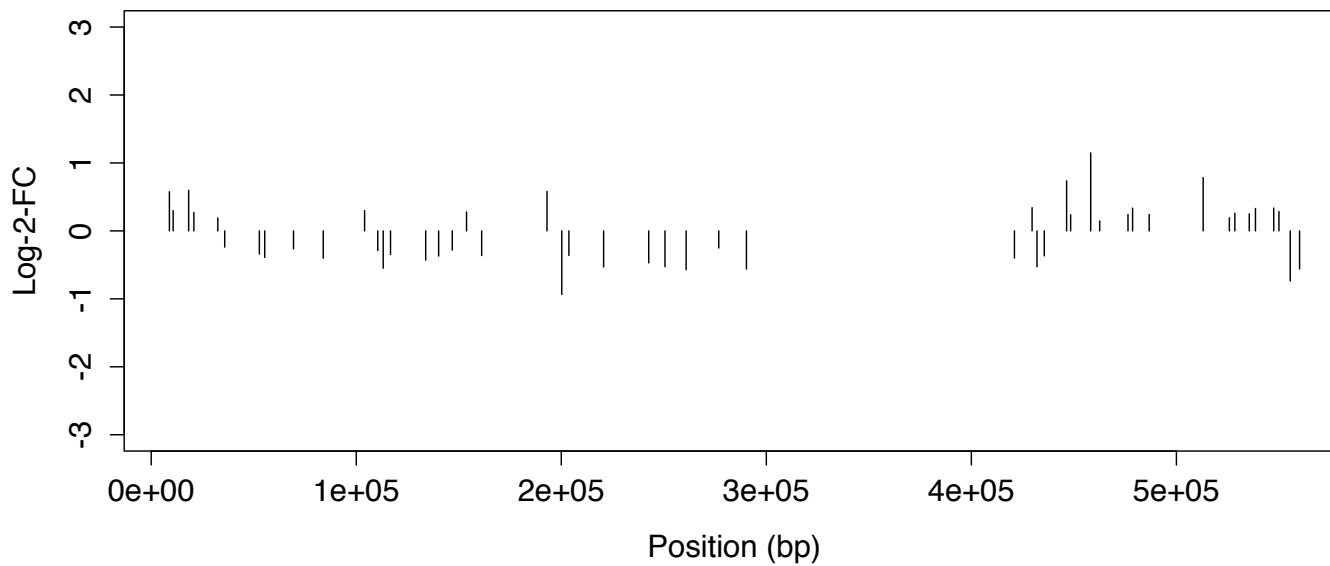

### Chromosome 8

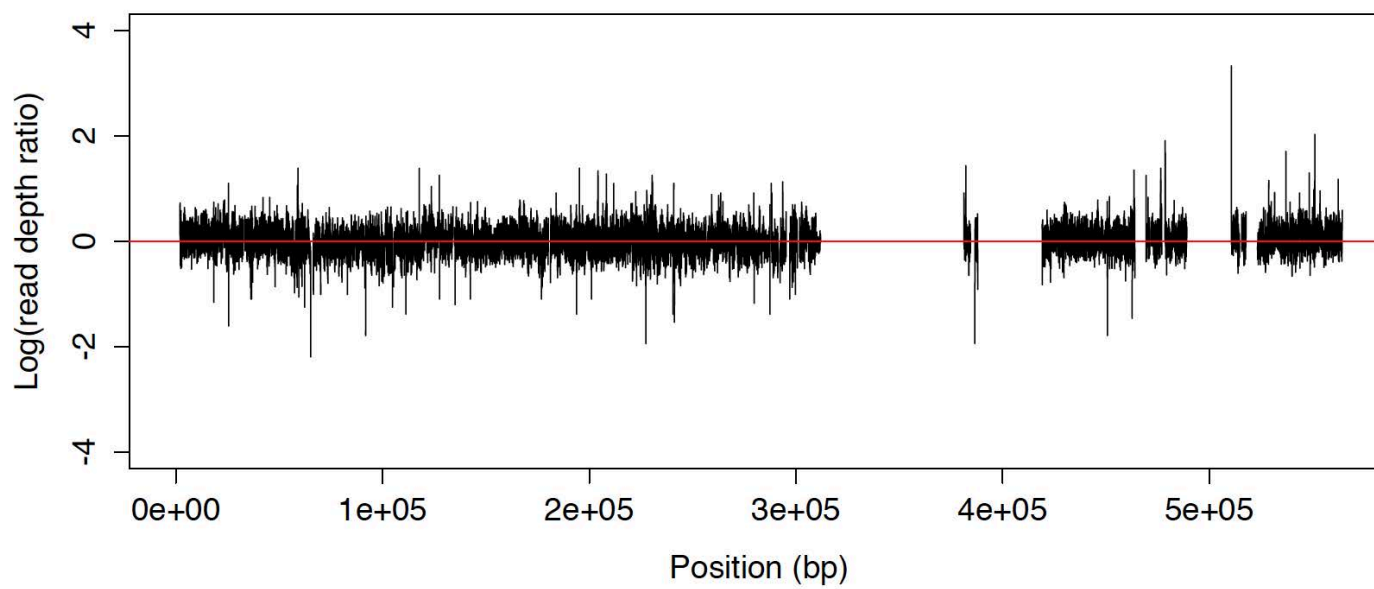



### Chromosome 9

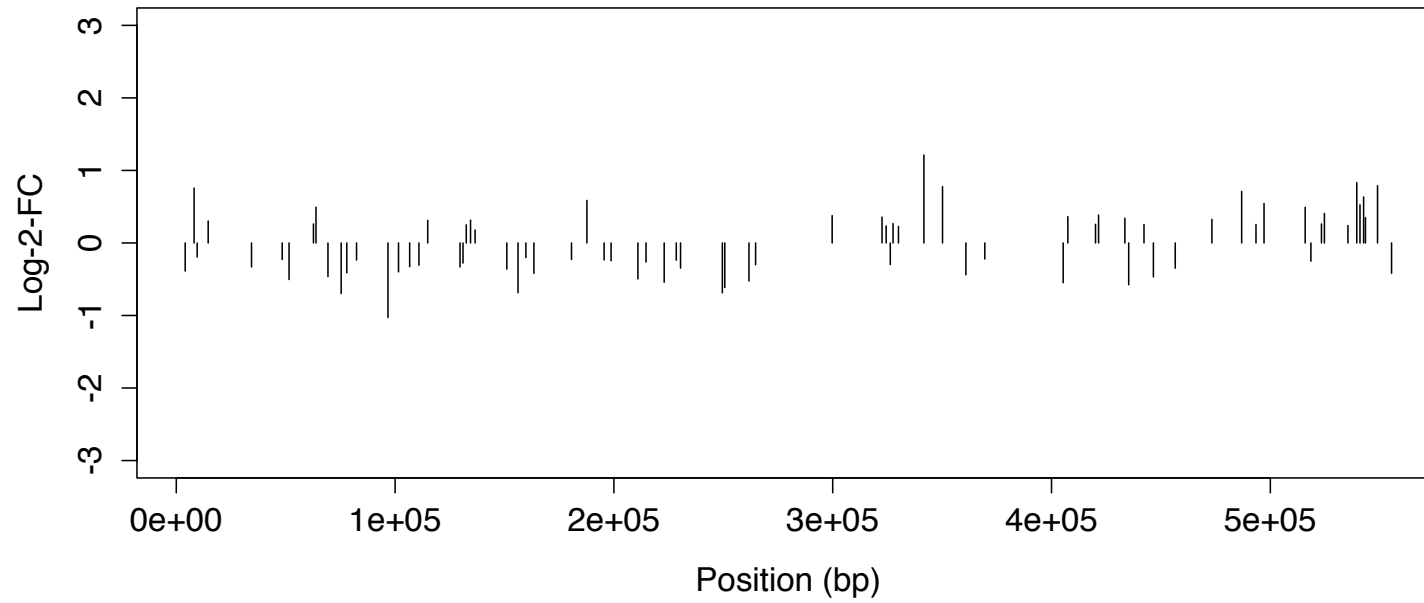

### Chromosome 9

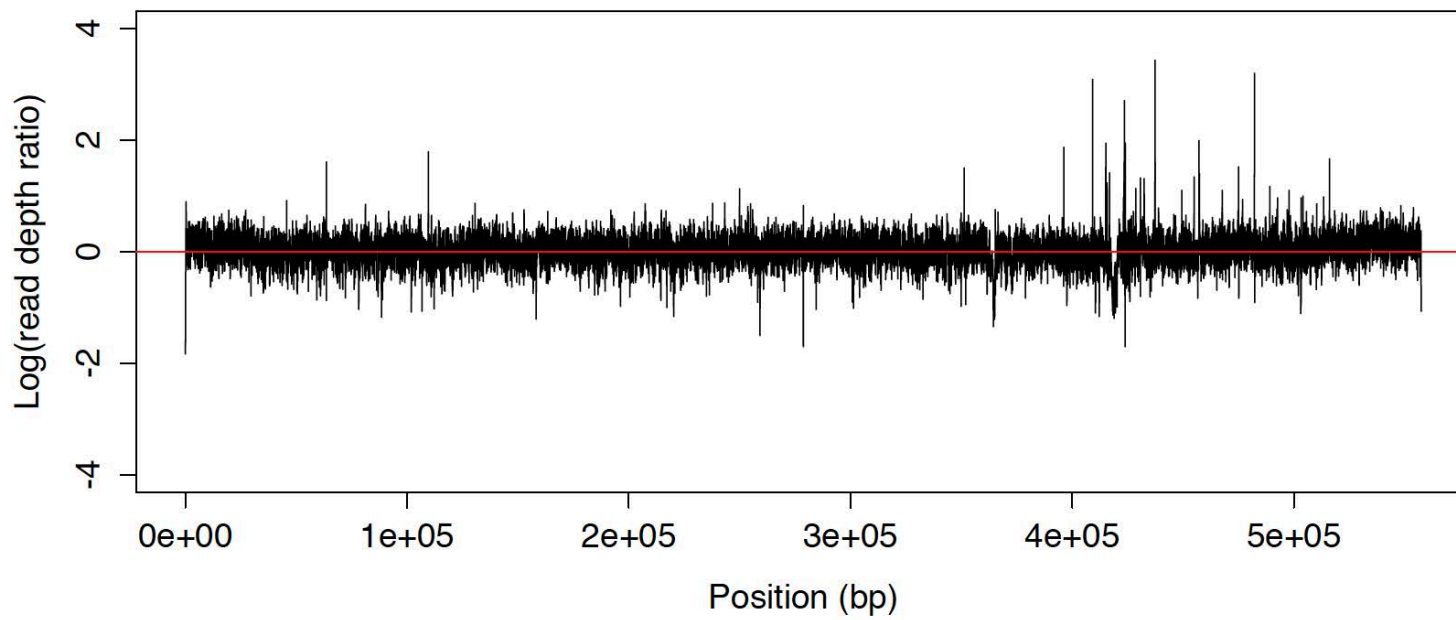

### Chromosome 10

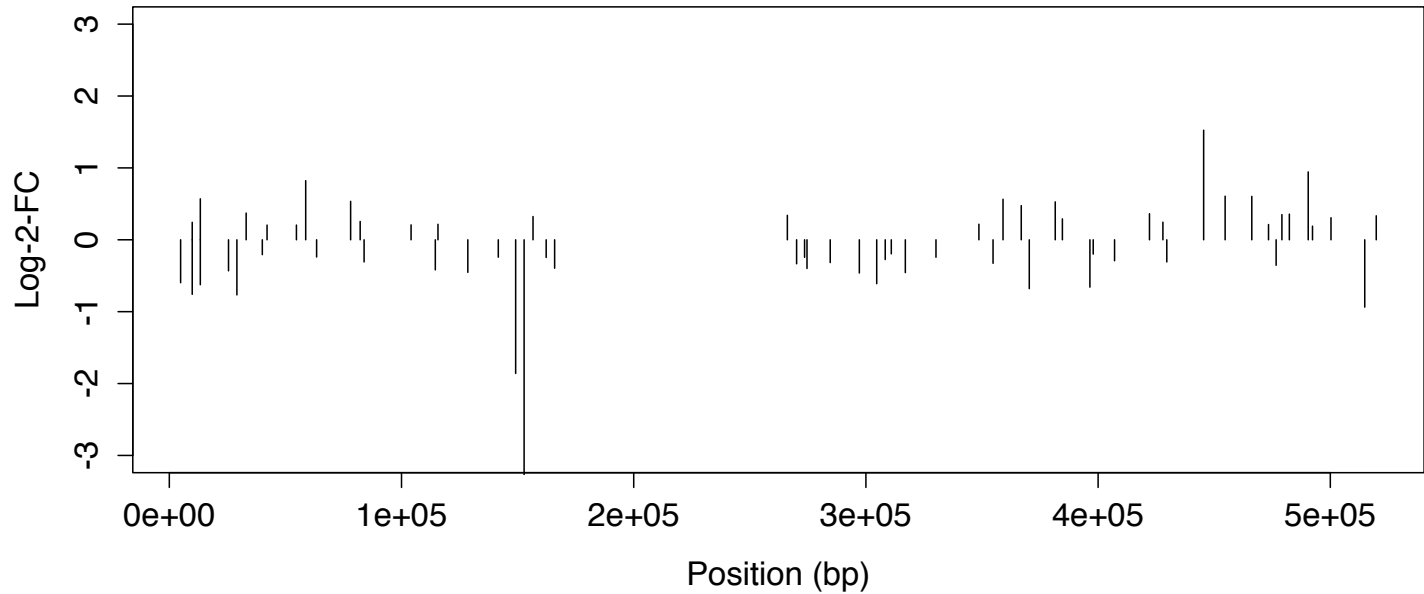

### Chromosome 10

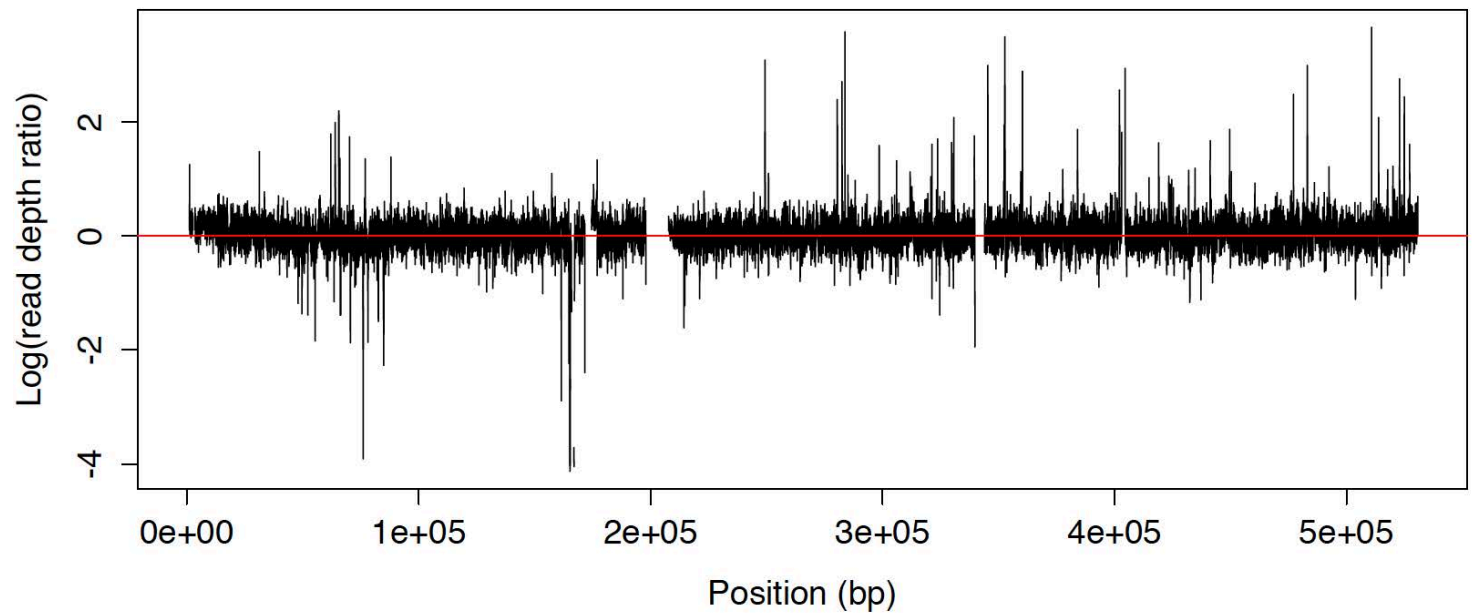

### Chromosome 11

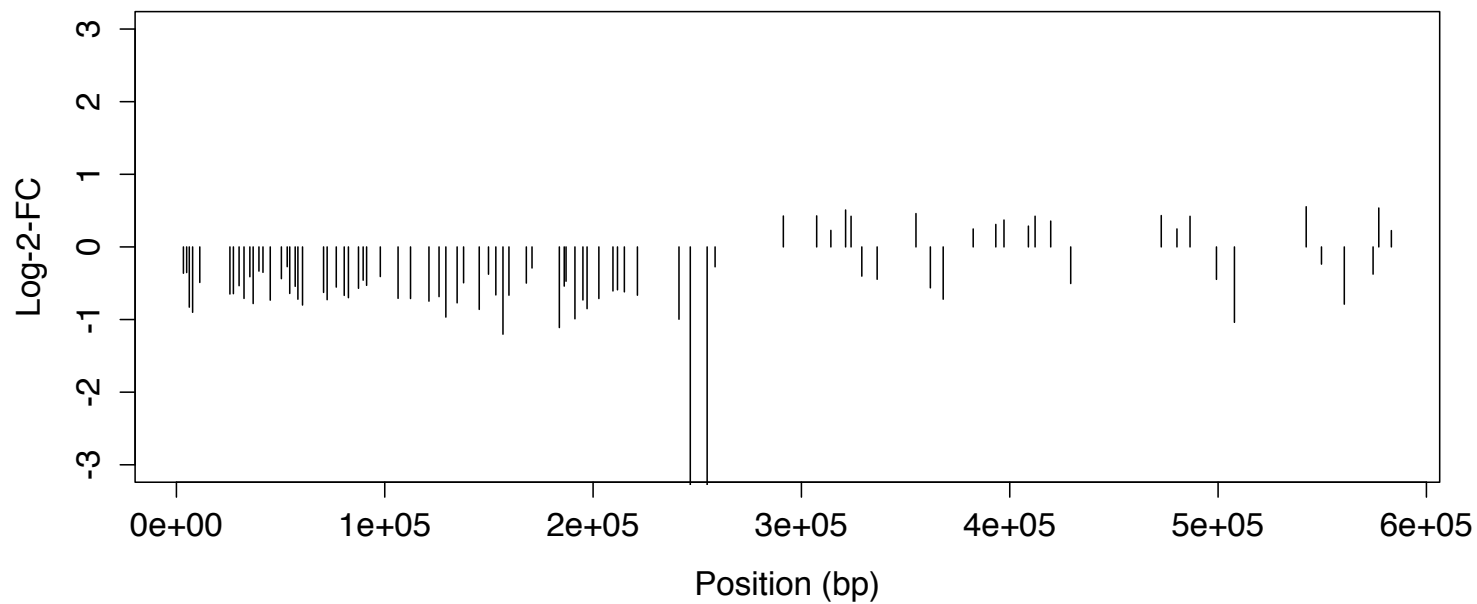

### Chromosome 11

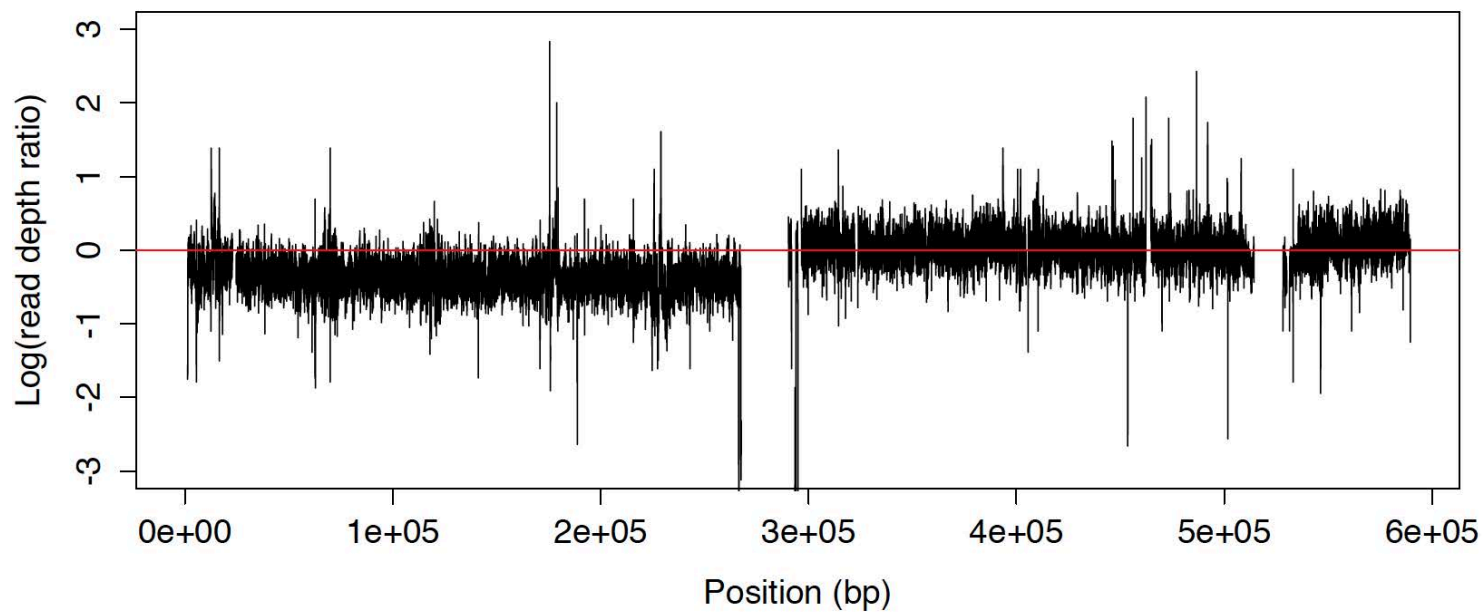

### Chromosome 12

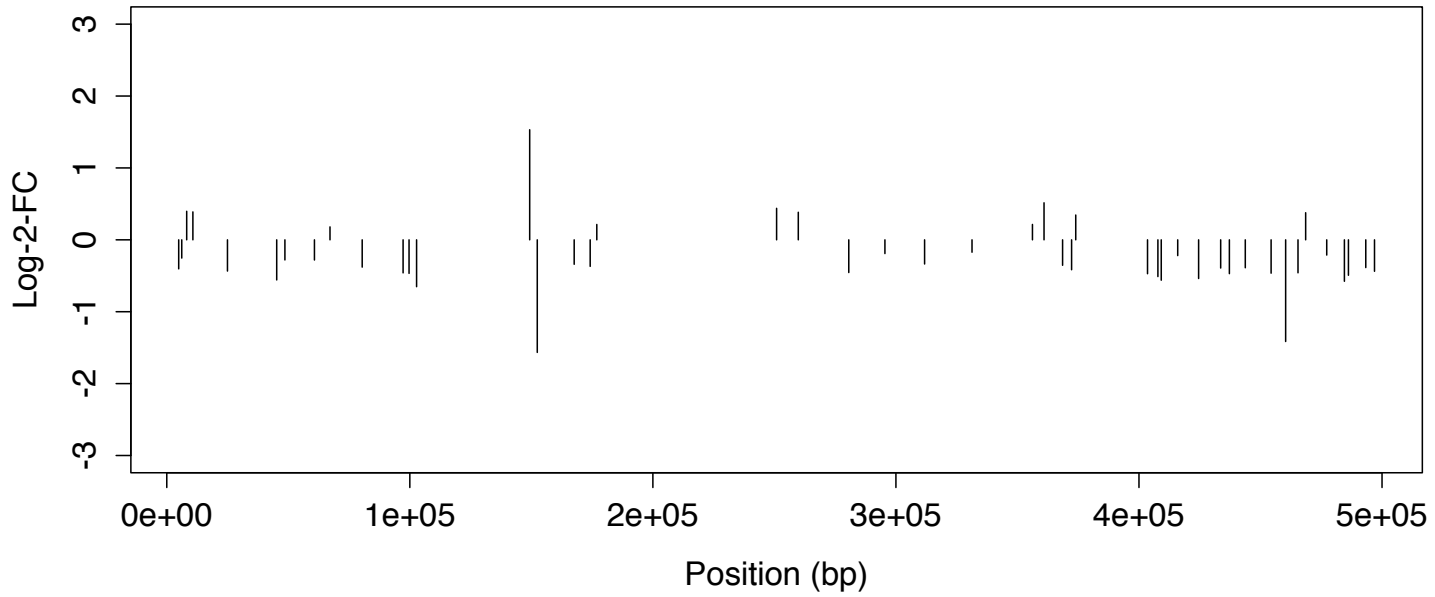

### Chromosome 12

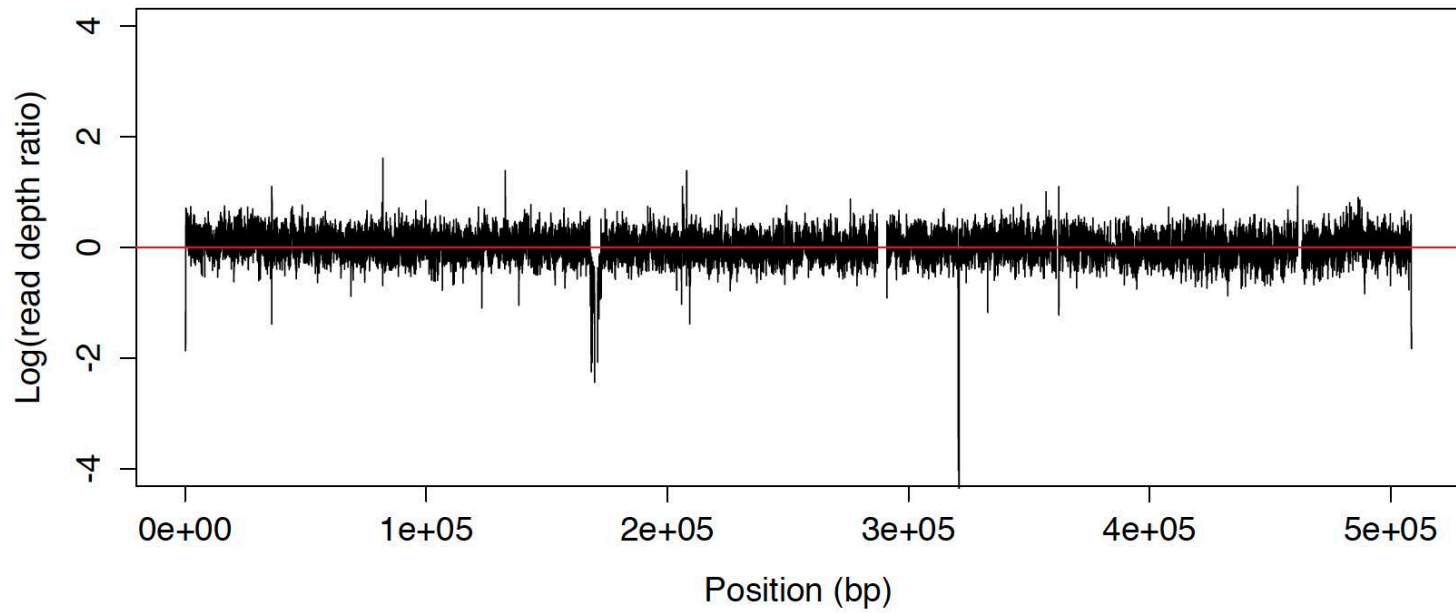

### Chromosome 13

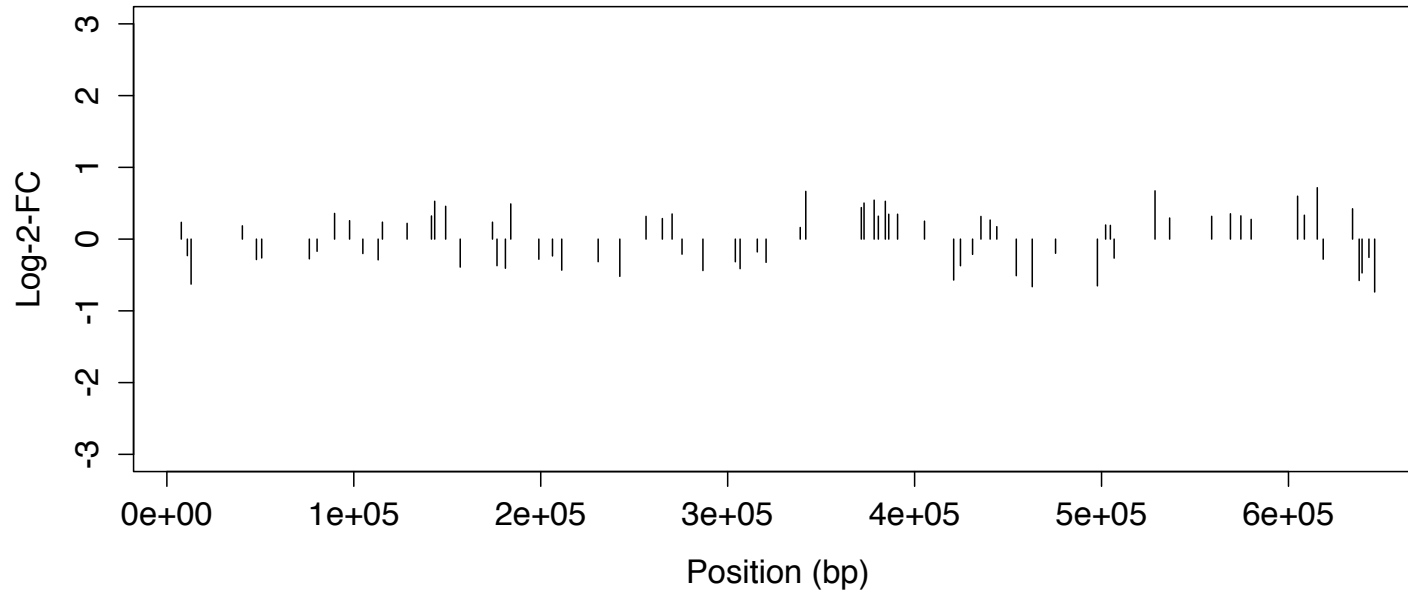

### Chromosome 13

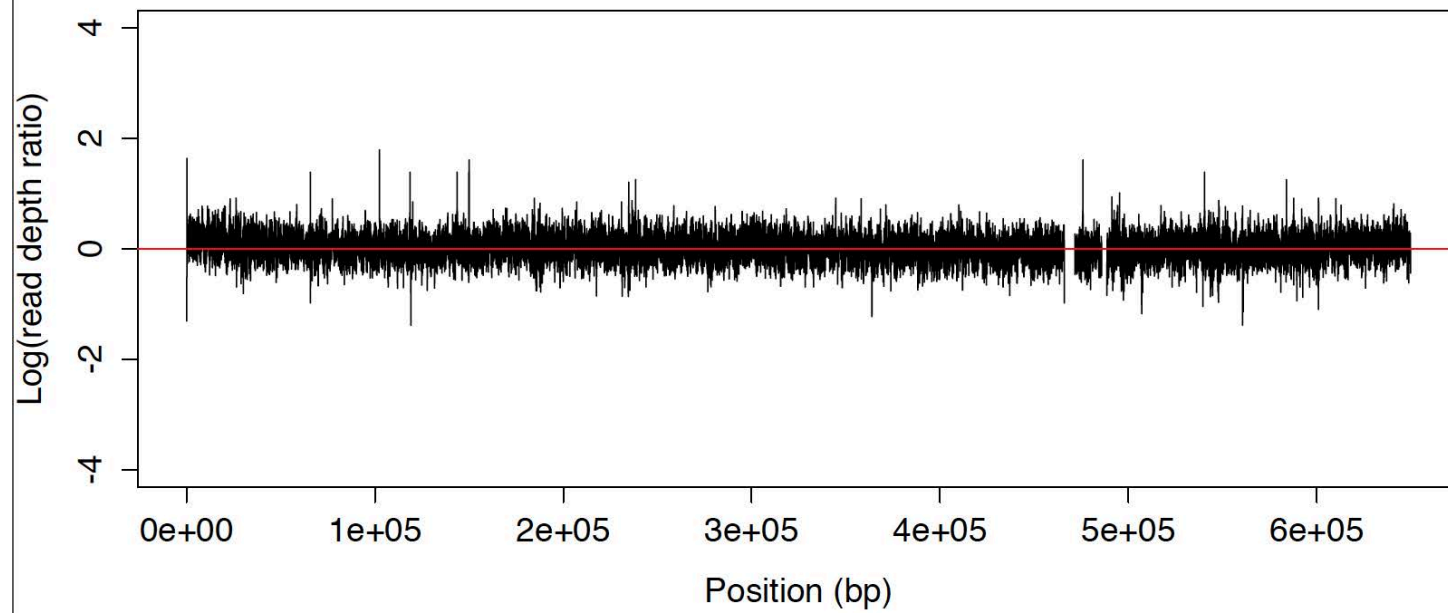

### Chromosome 14

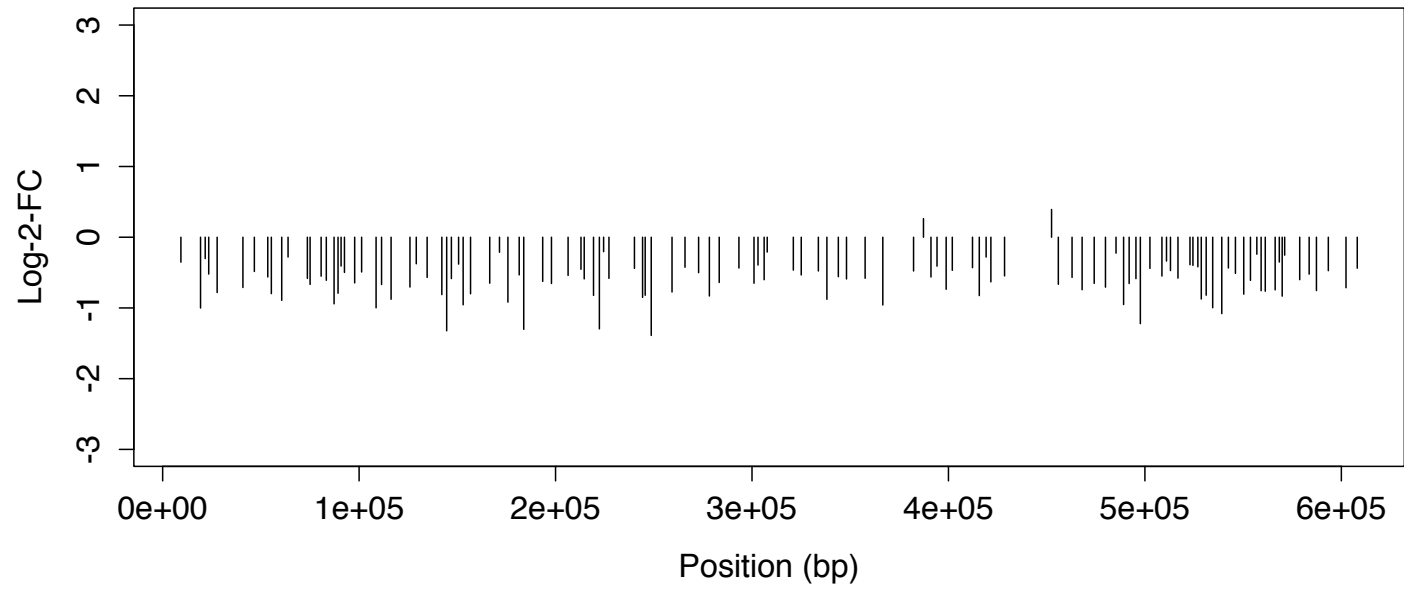

### Chromosome 14

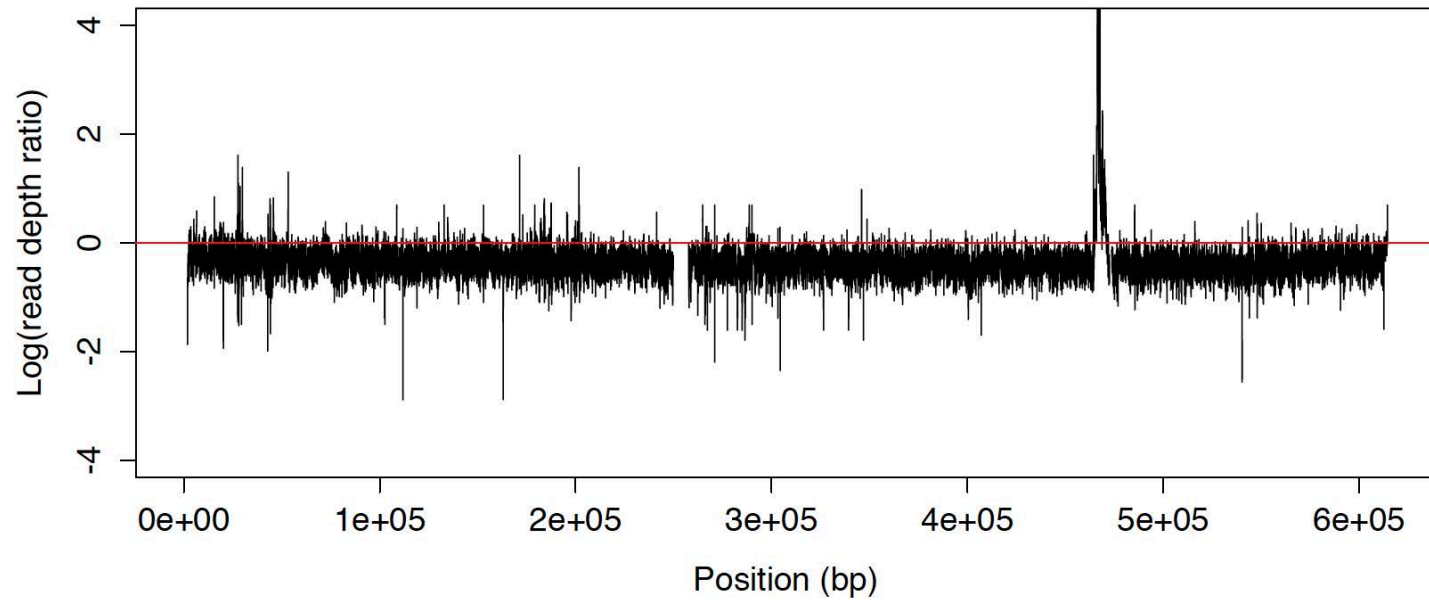

### Chromosome 15

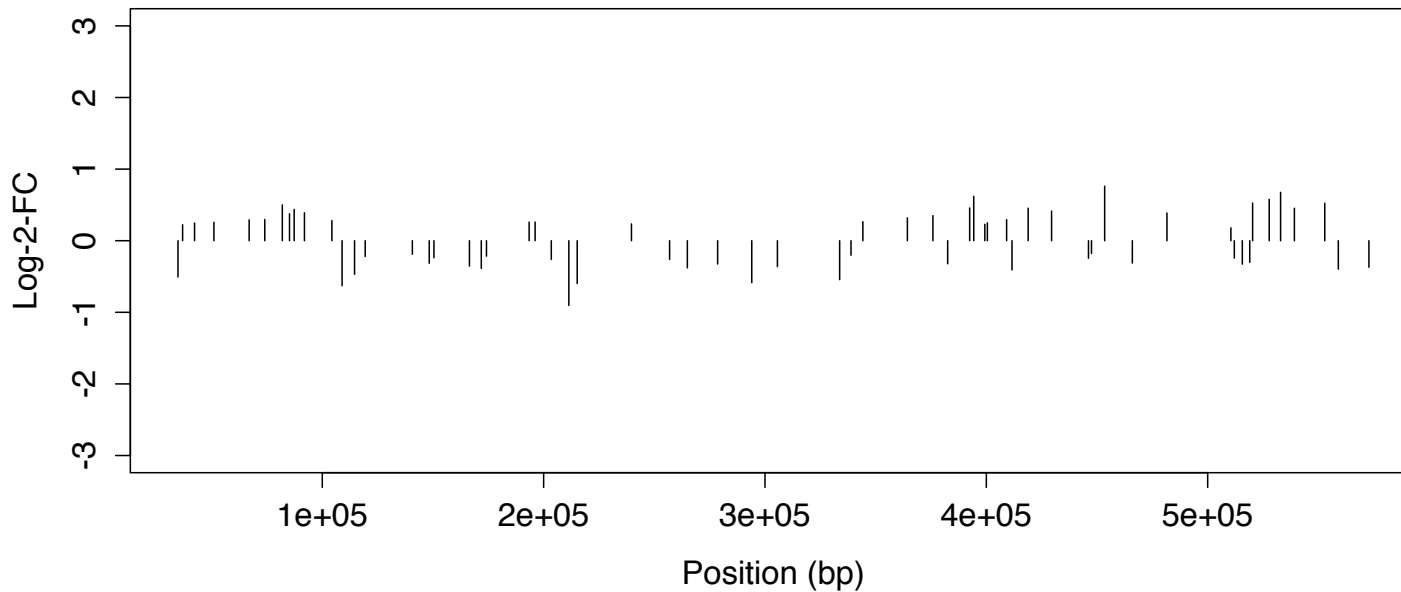

### Chromosome 15

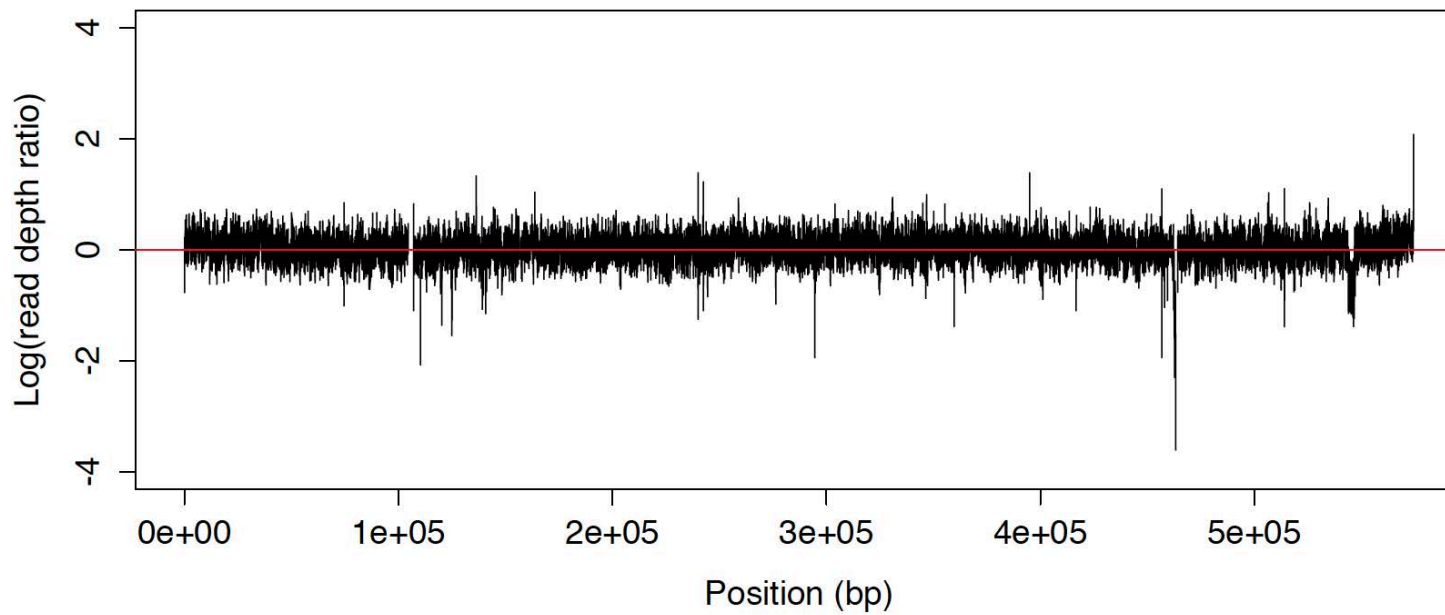

### Chromosome 16

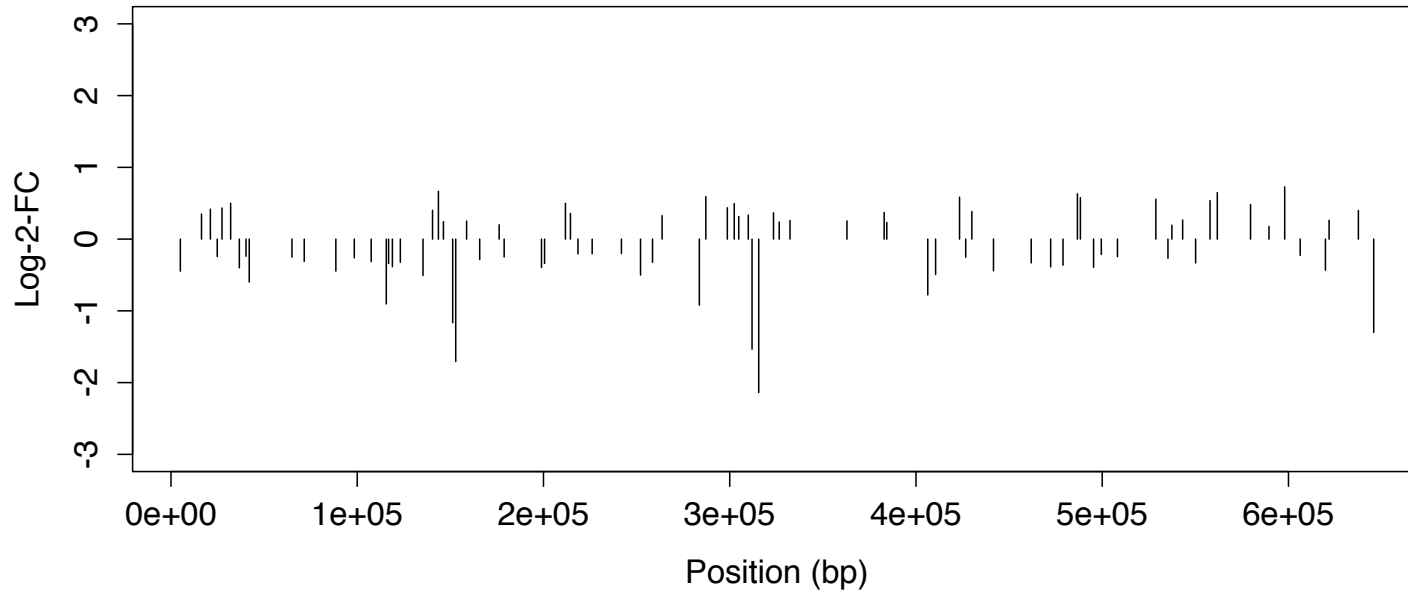

### Chromosome 16

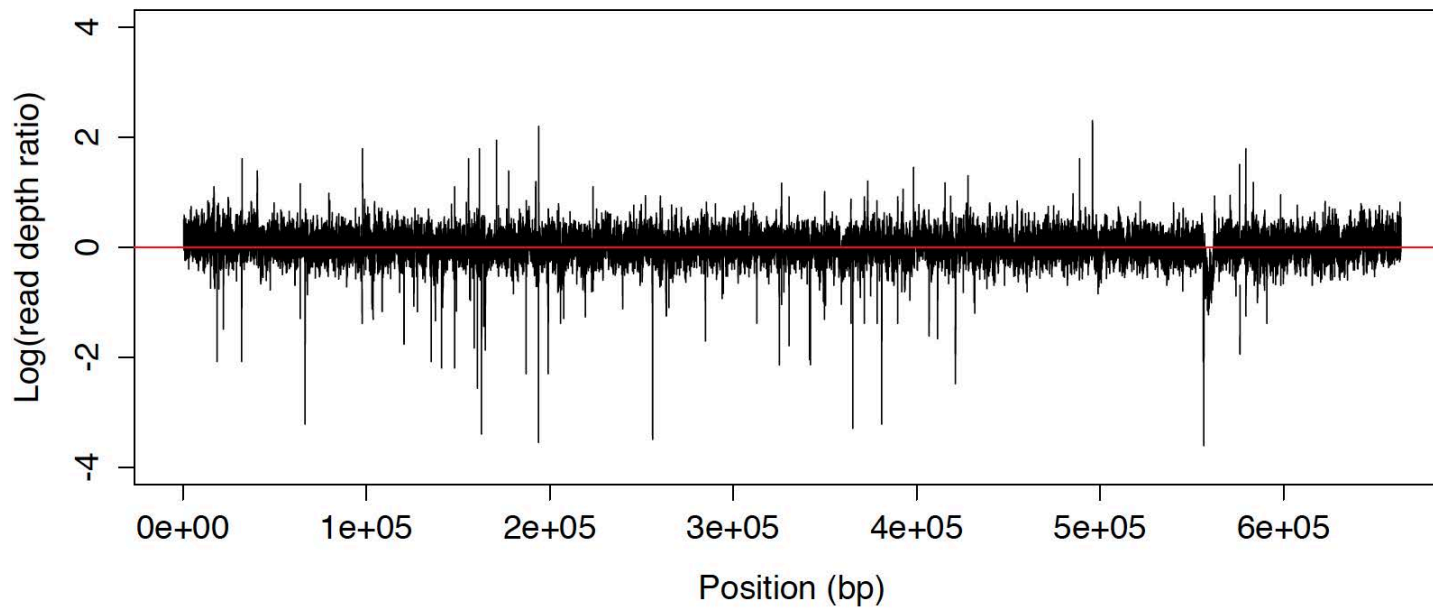



### Chromosome 17

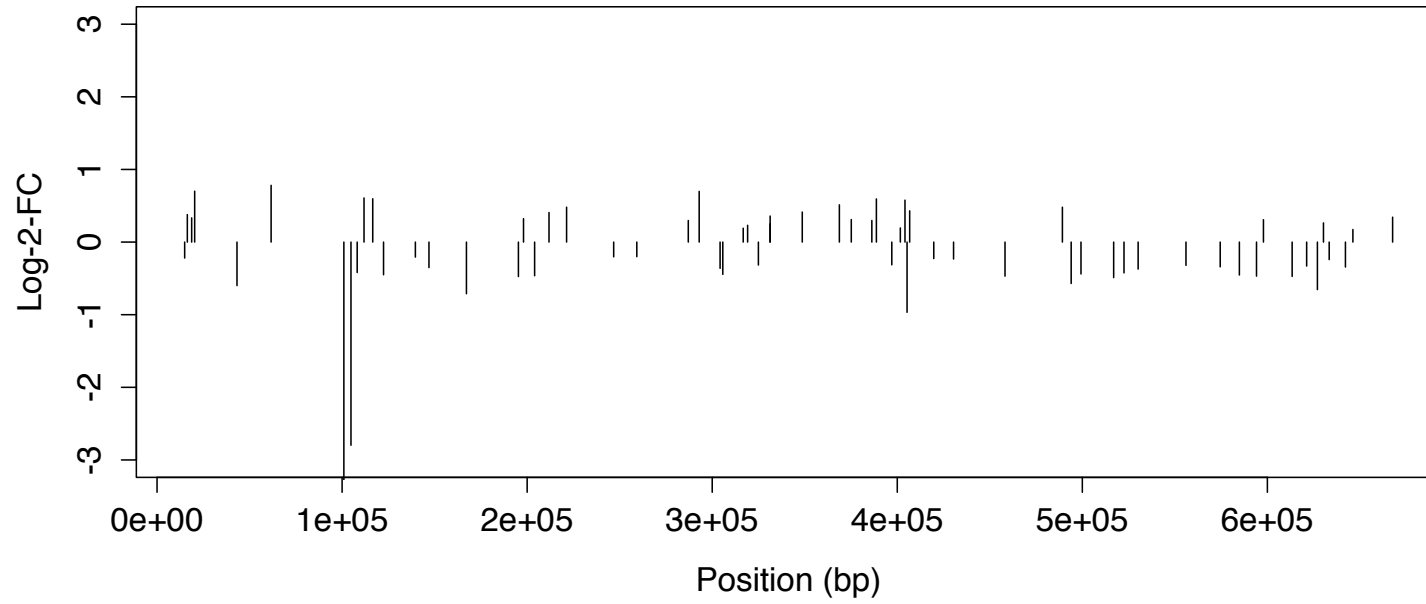

### Chromosome 17

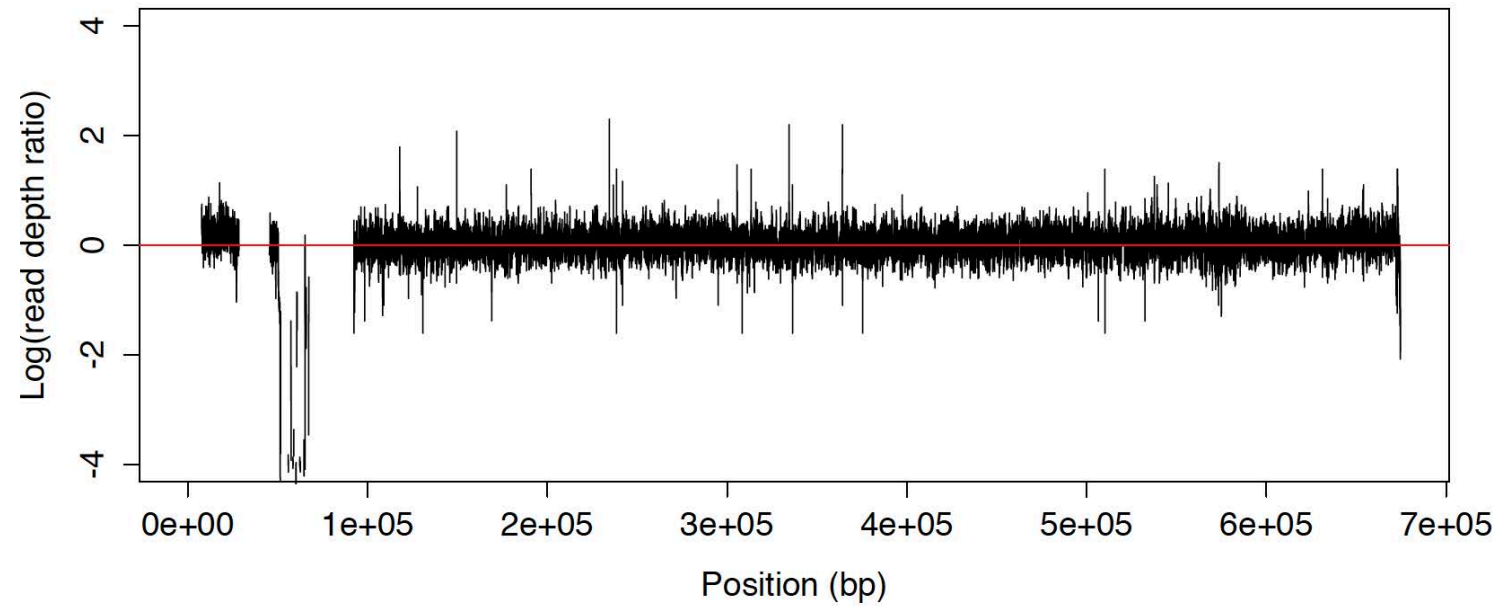

### Chromosome 18

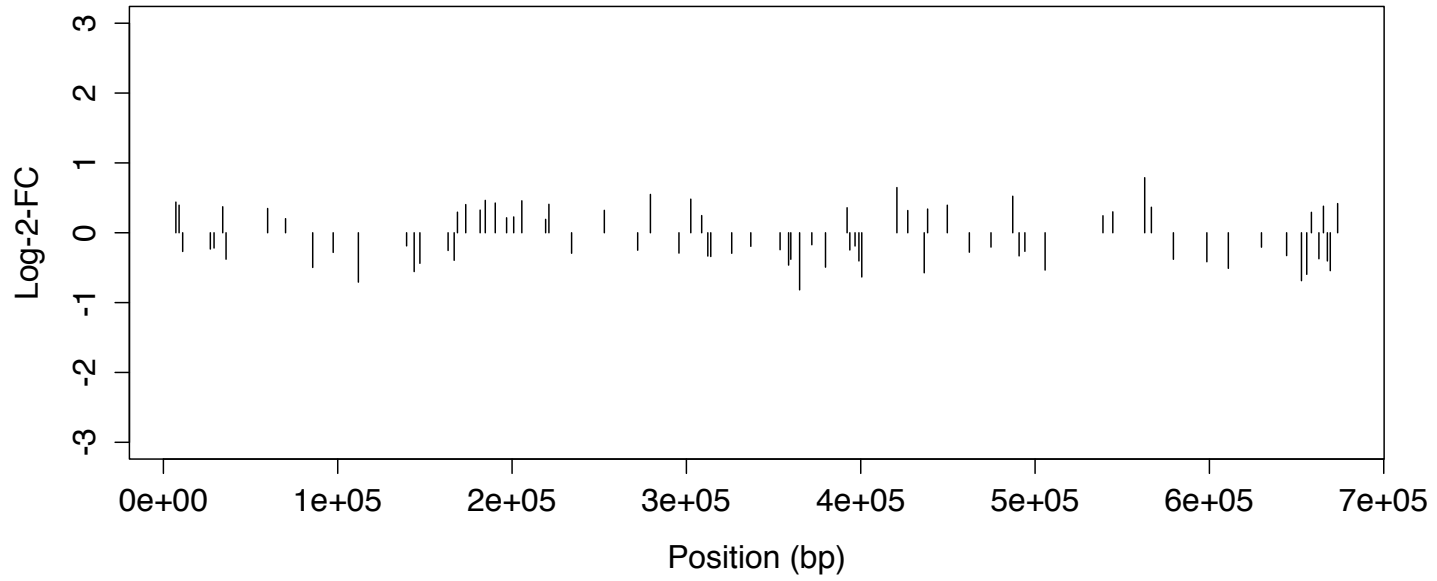

### Chromosome 18

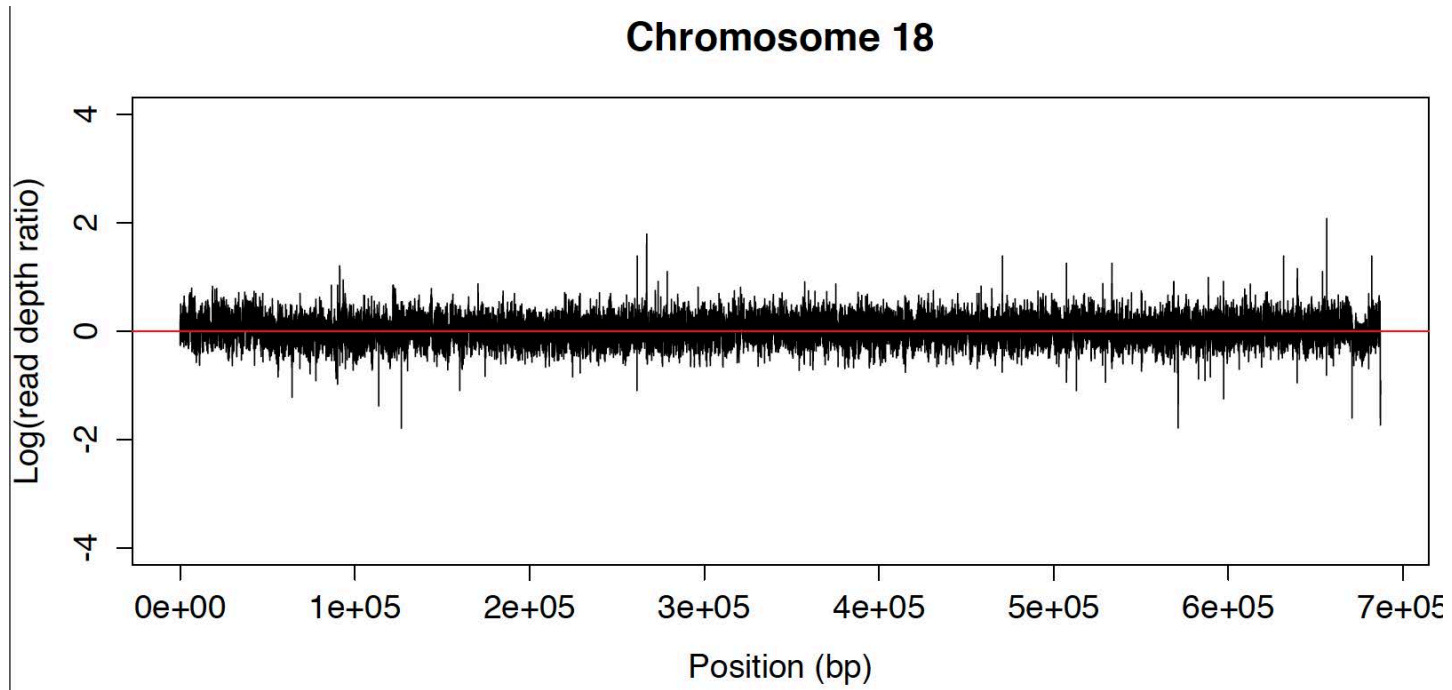

### Chromosome 19

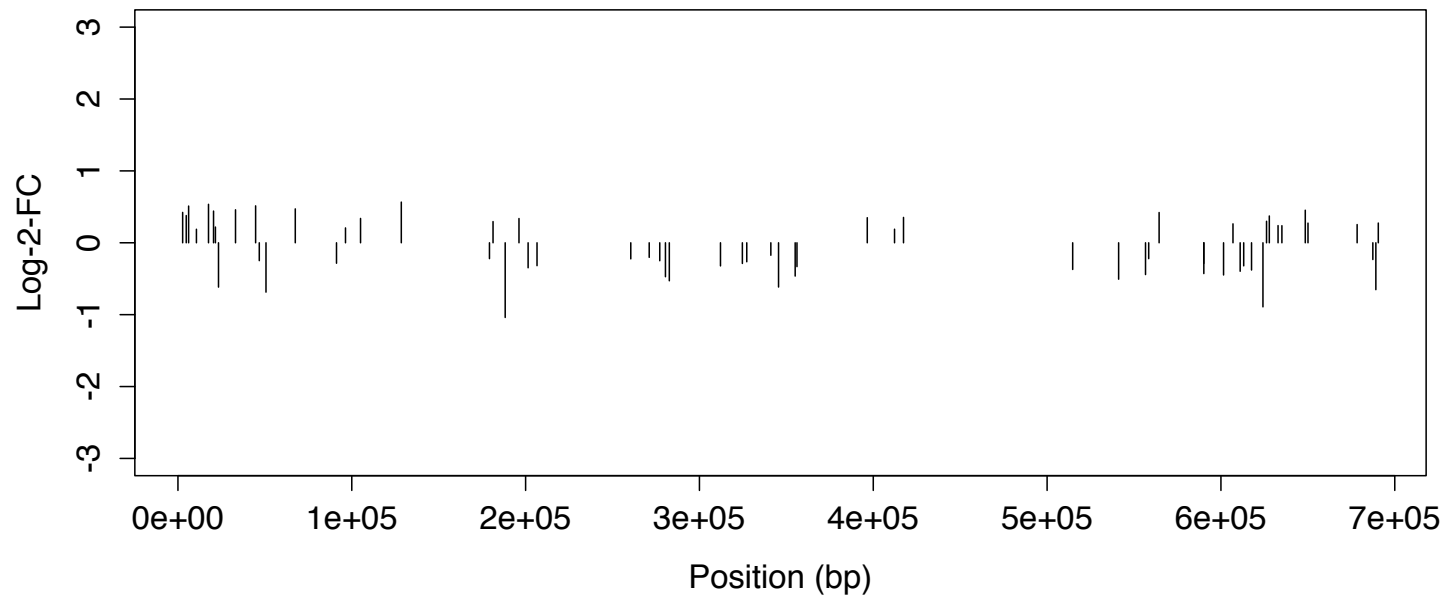

### Chromosome 19

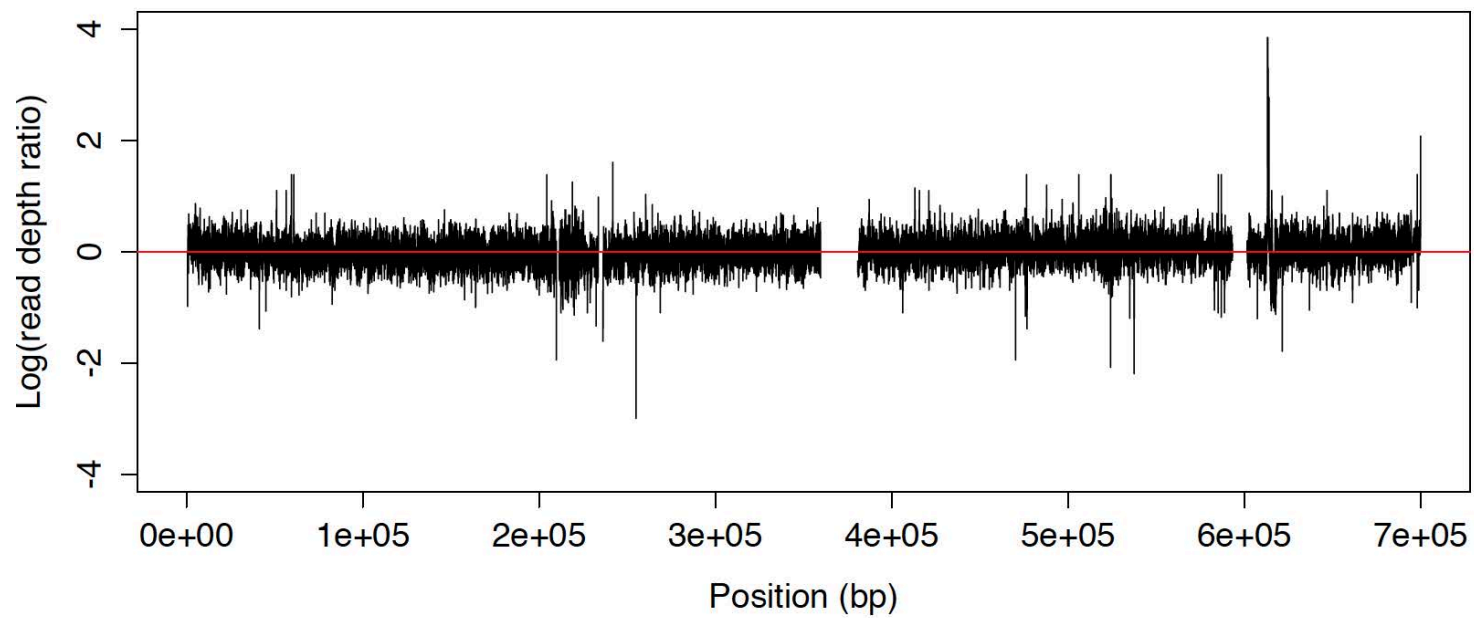

### Chromosome 20

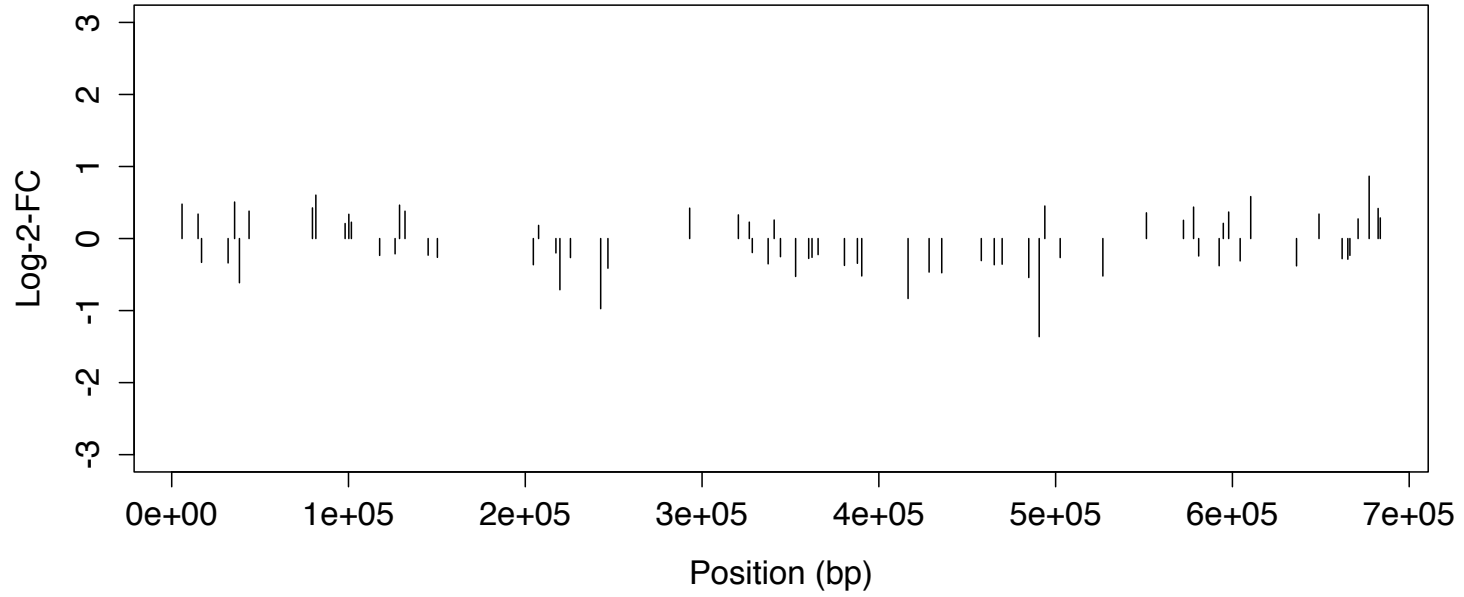

### Chromosome 20

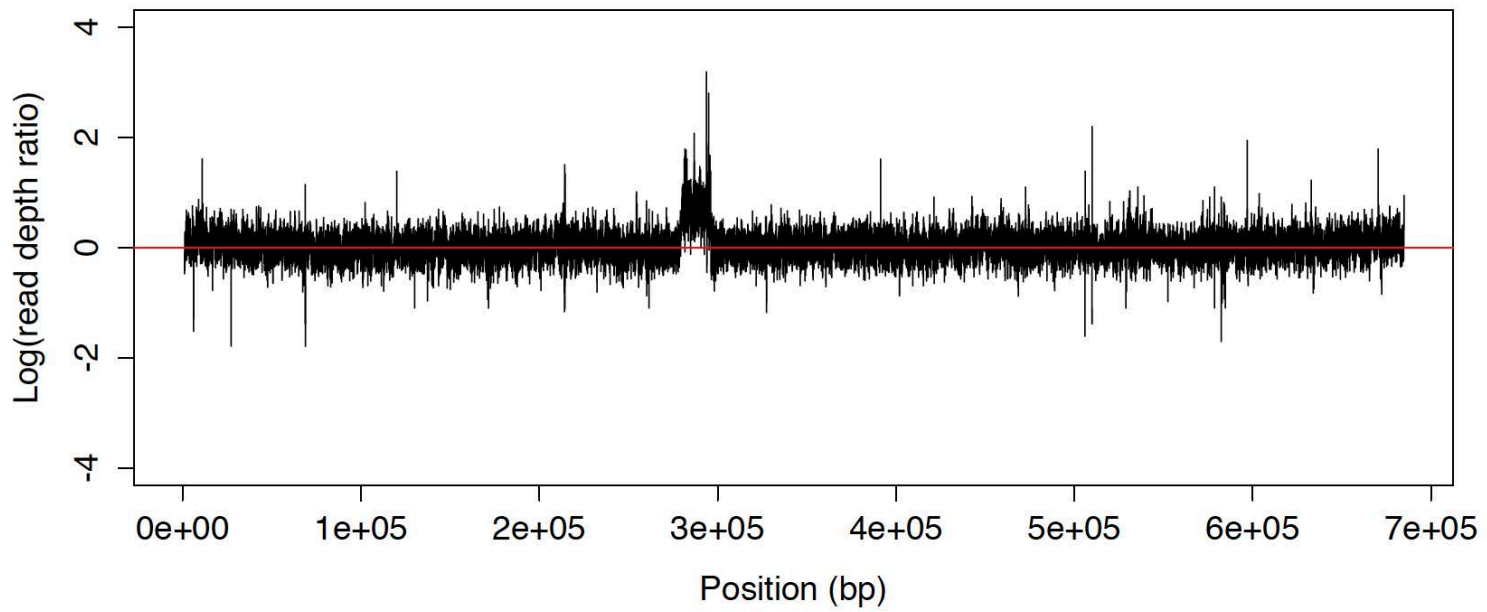

### Chromosome 21

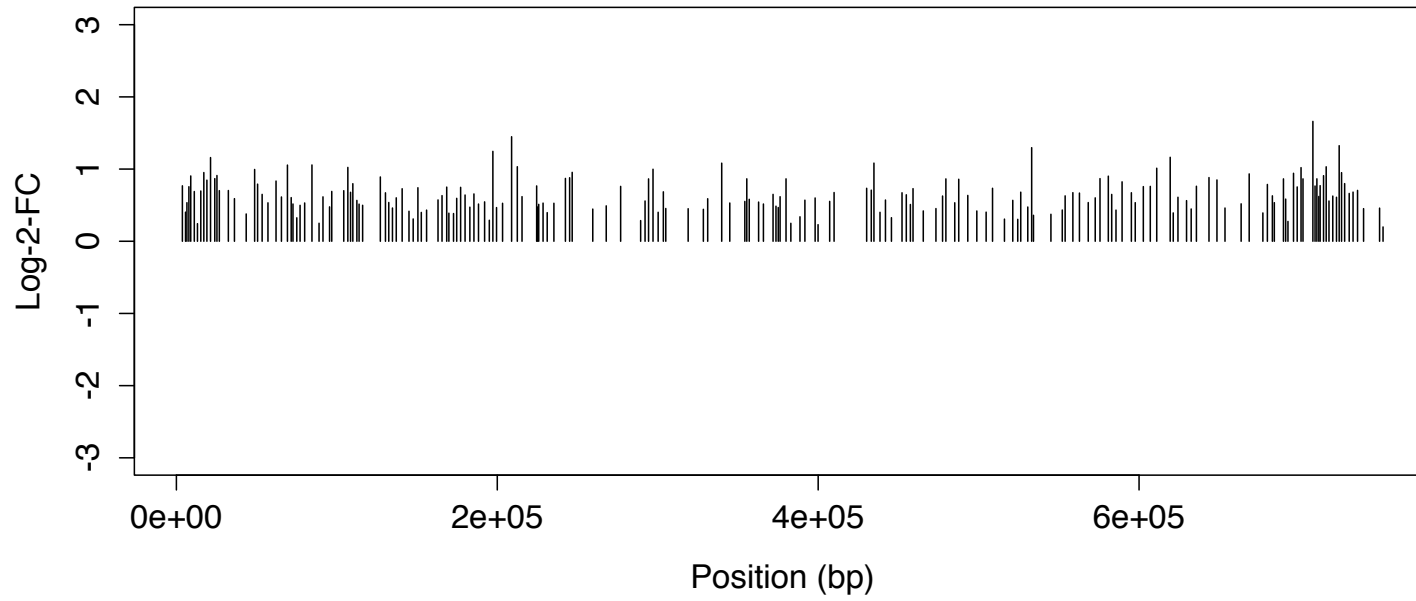

### Chromosome 21

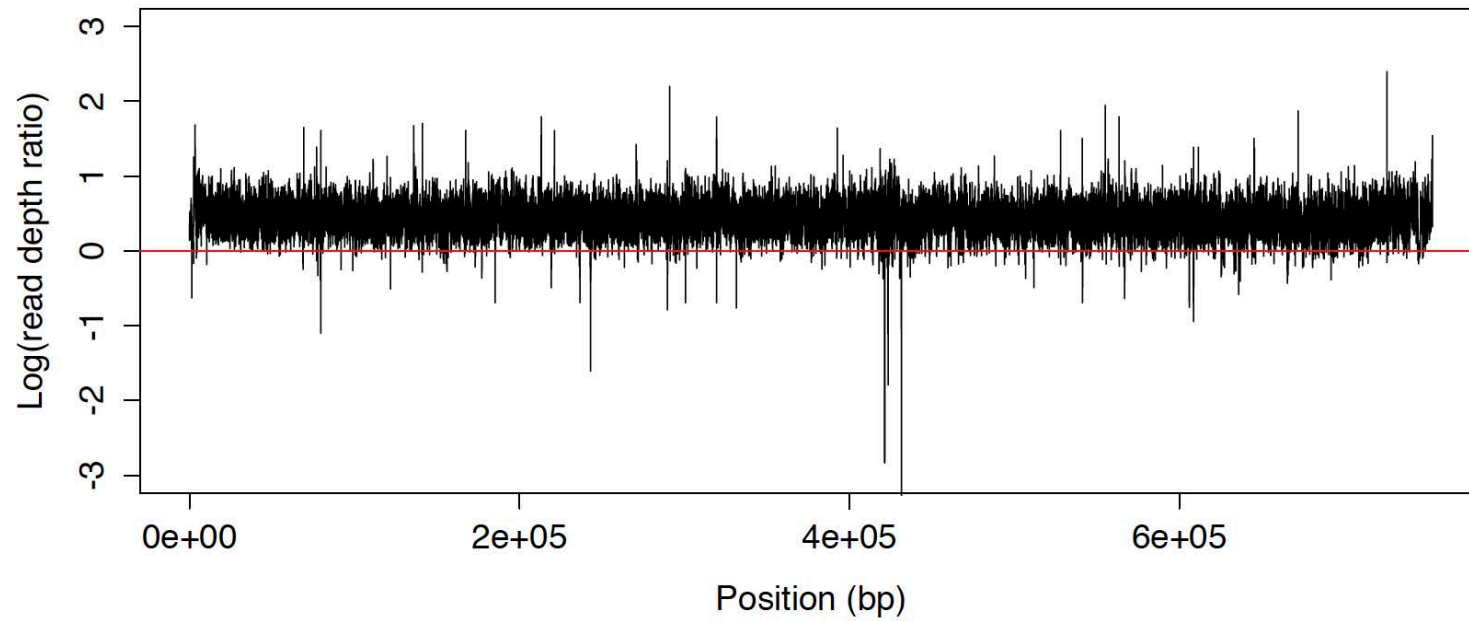

### Chromosome 22

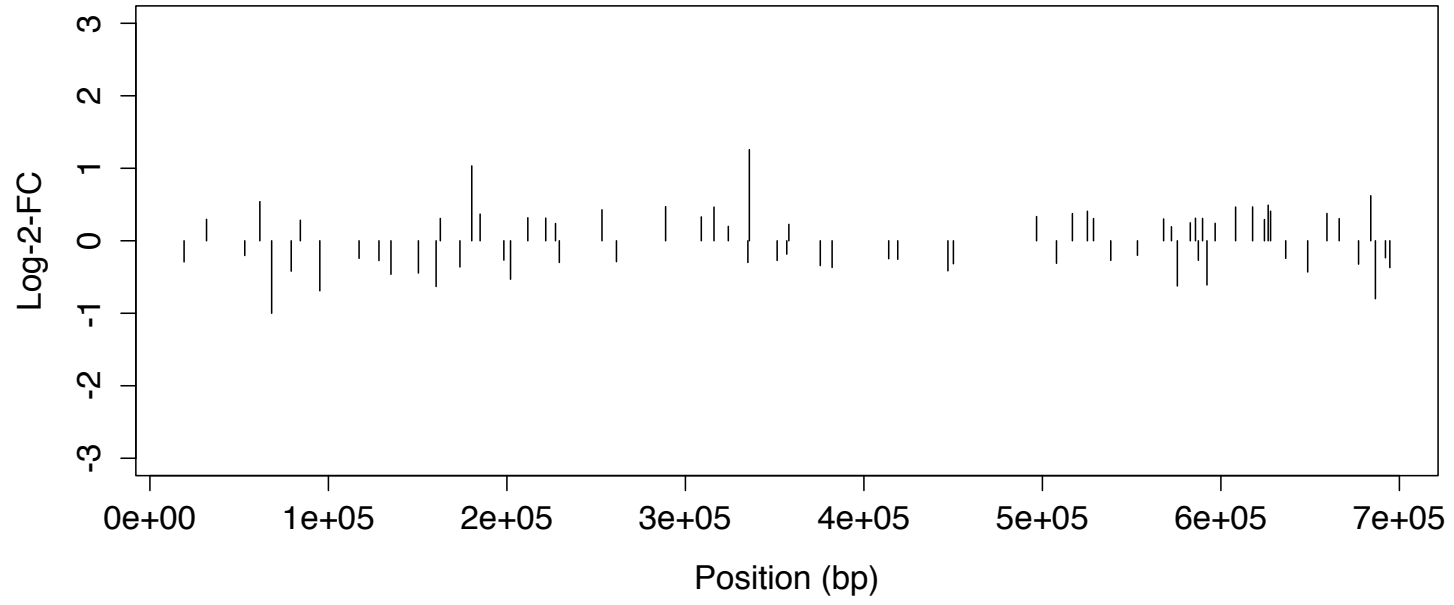

### Chromosome 22

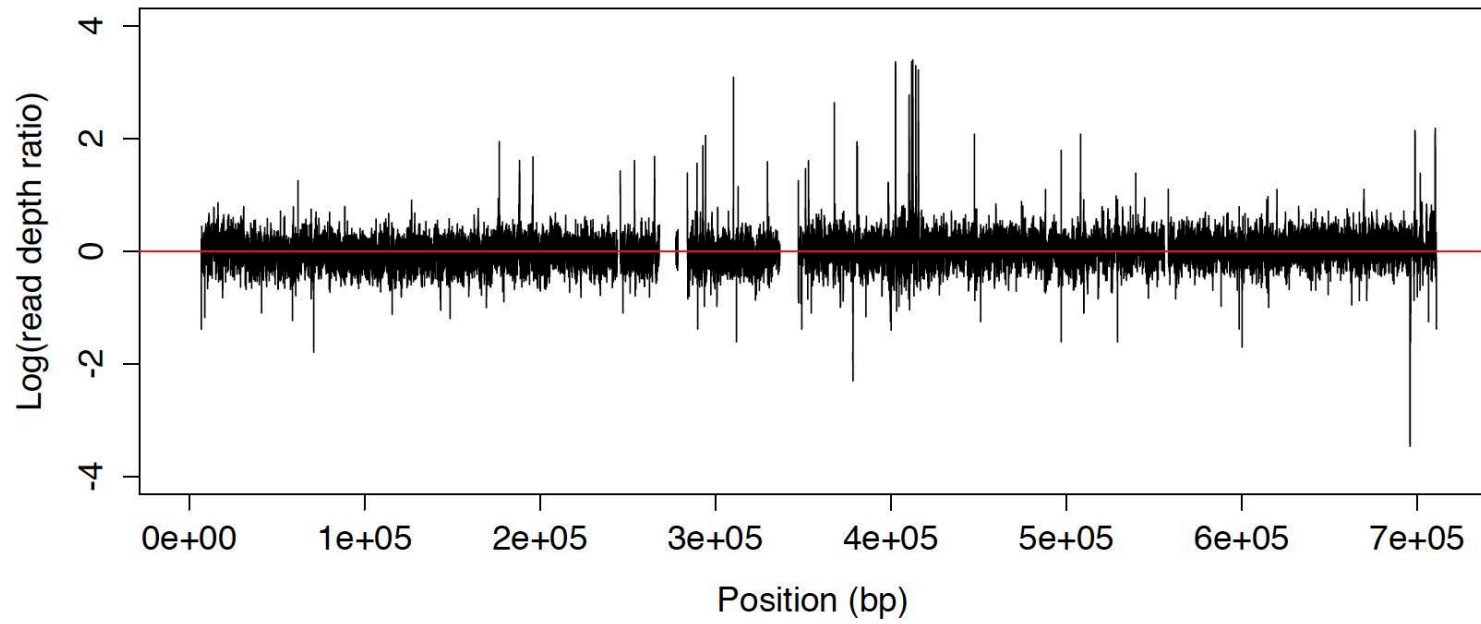

### Chromosome 23

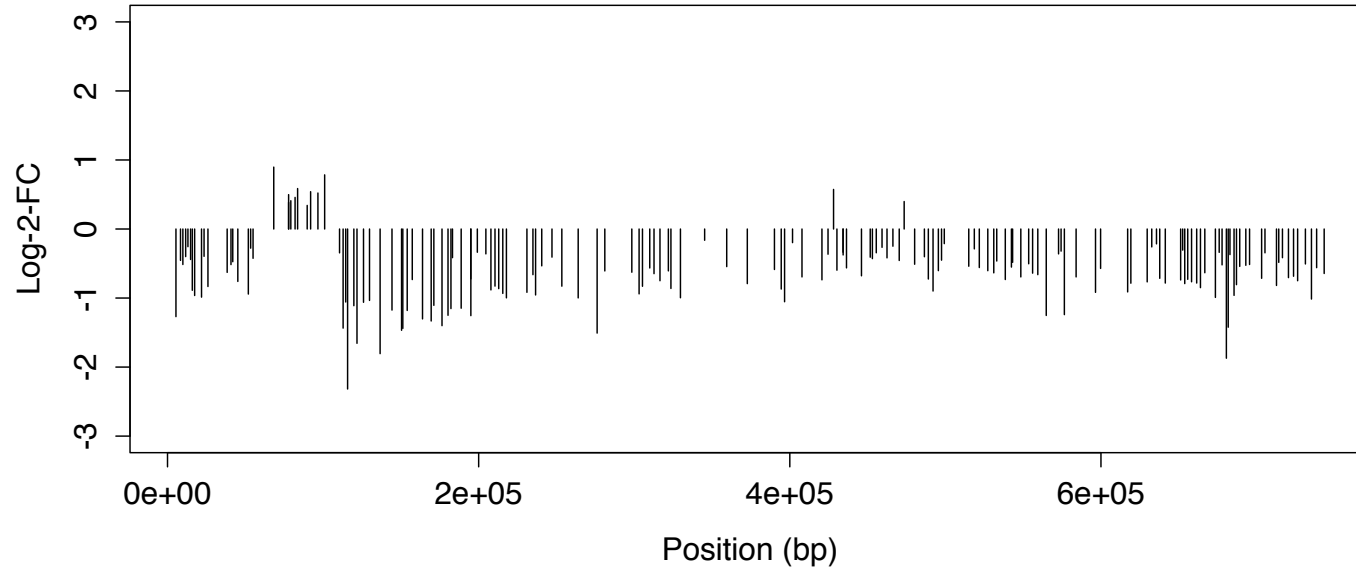

### Chromosome 23

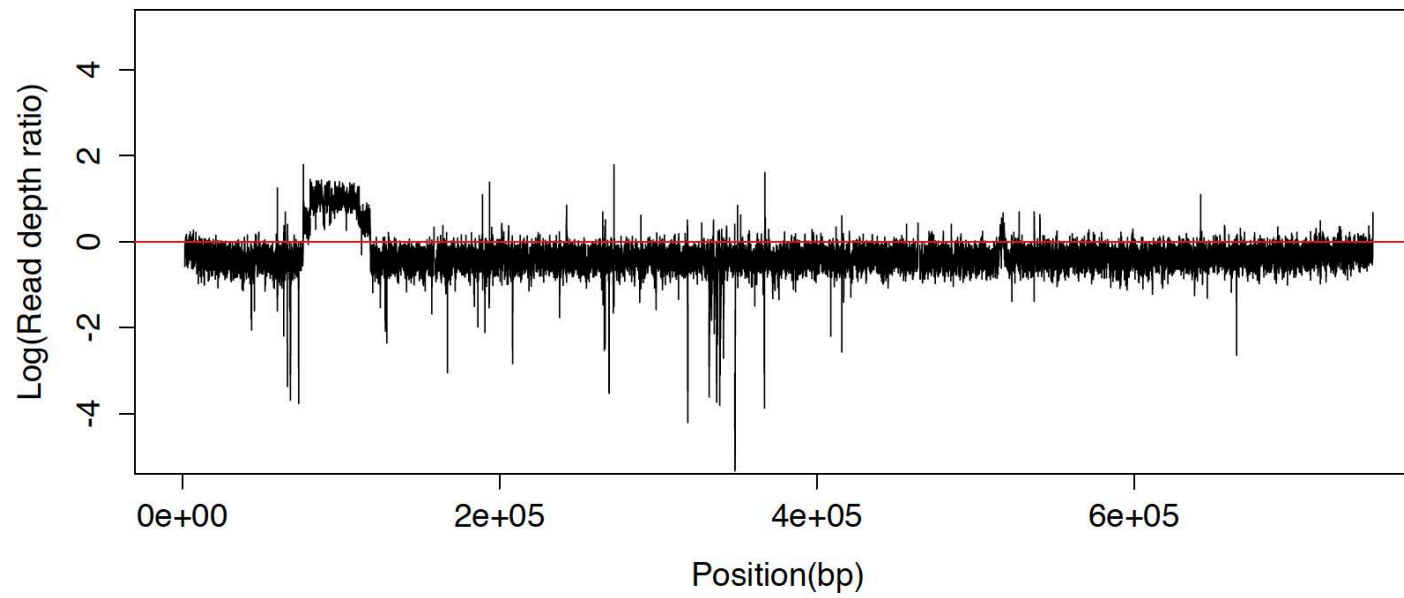

### Chromosome 24

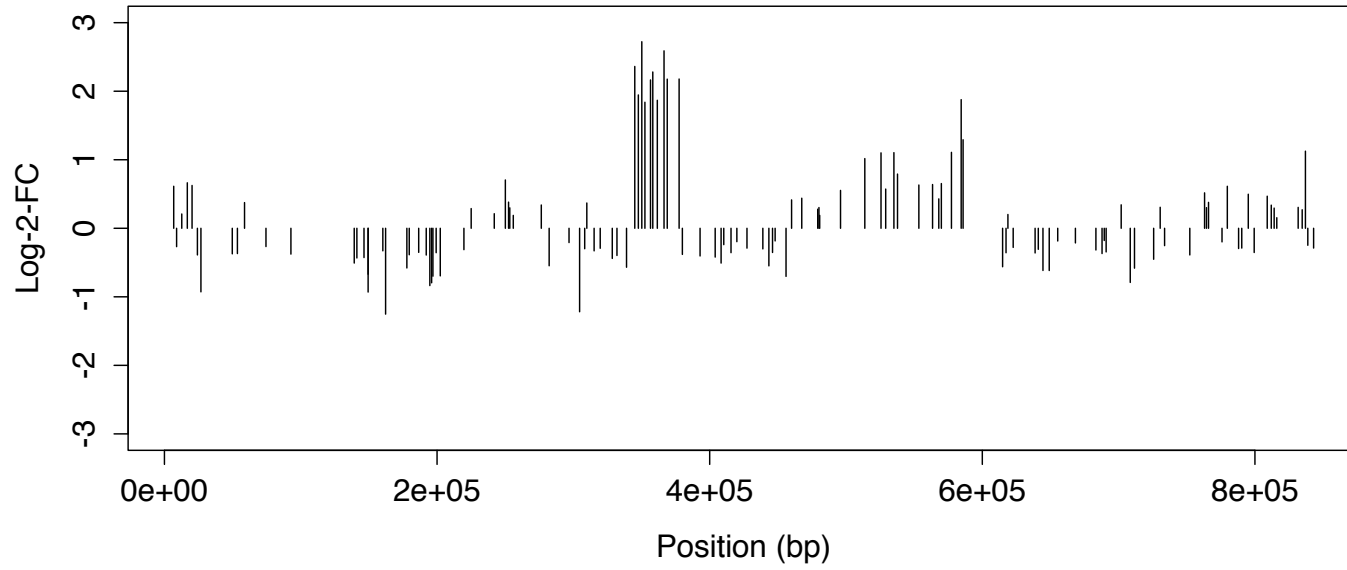

### Chromosome 24

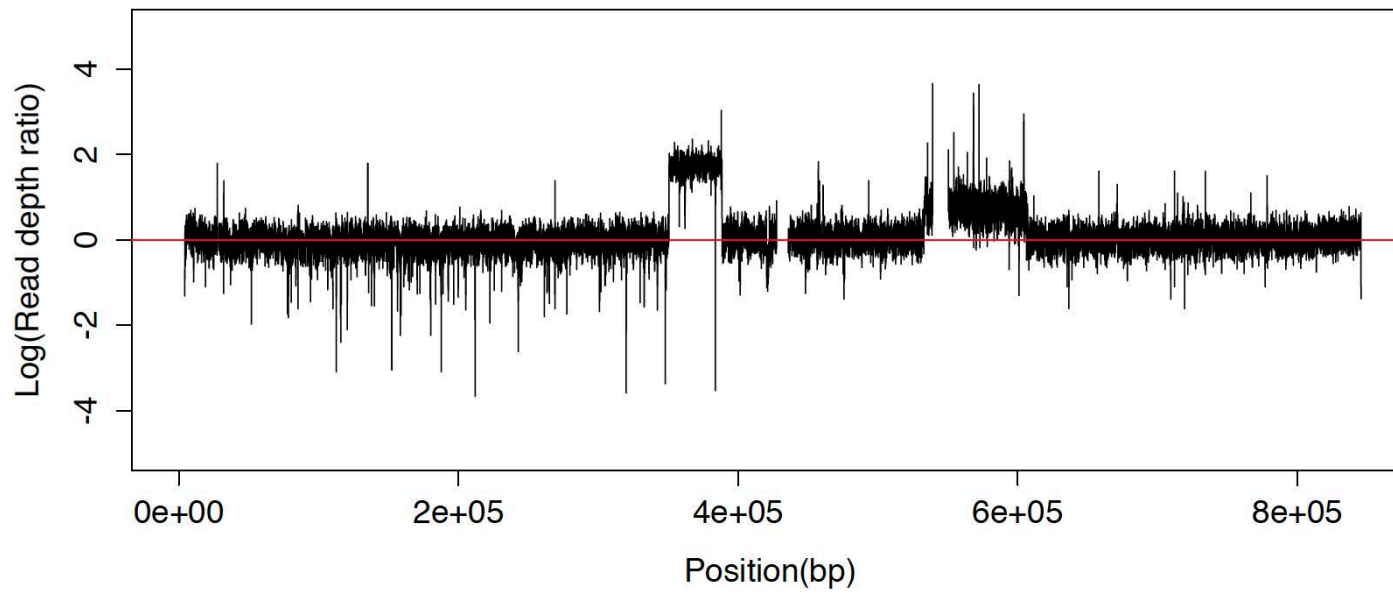



### Chromosome 25

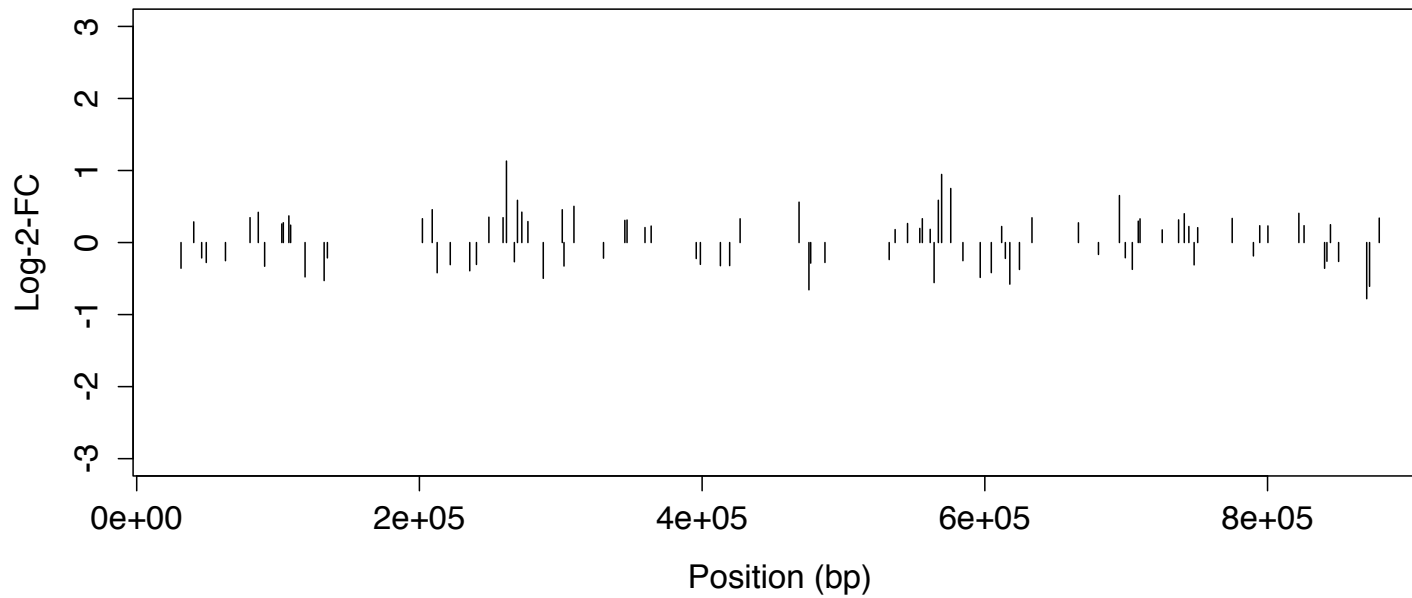

### Chromosome 25

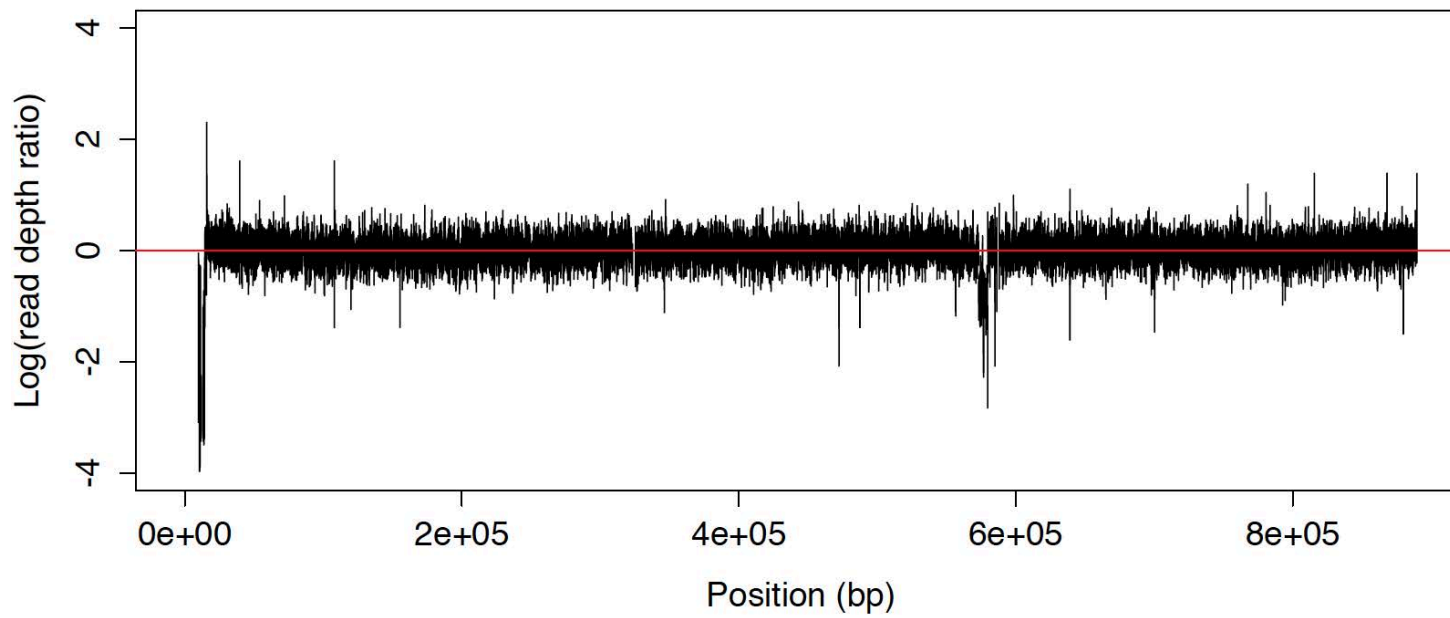

### Chromosome 26

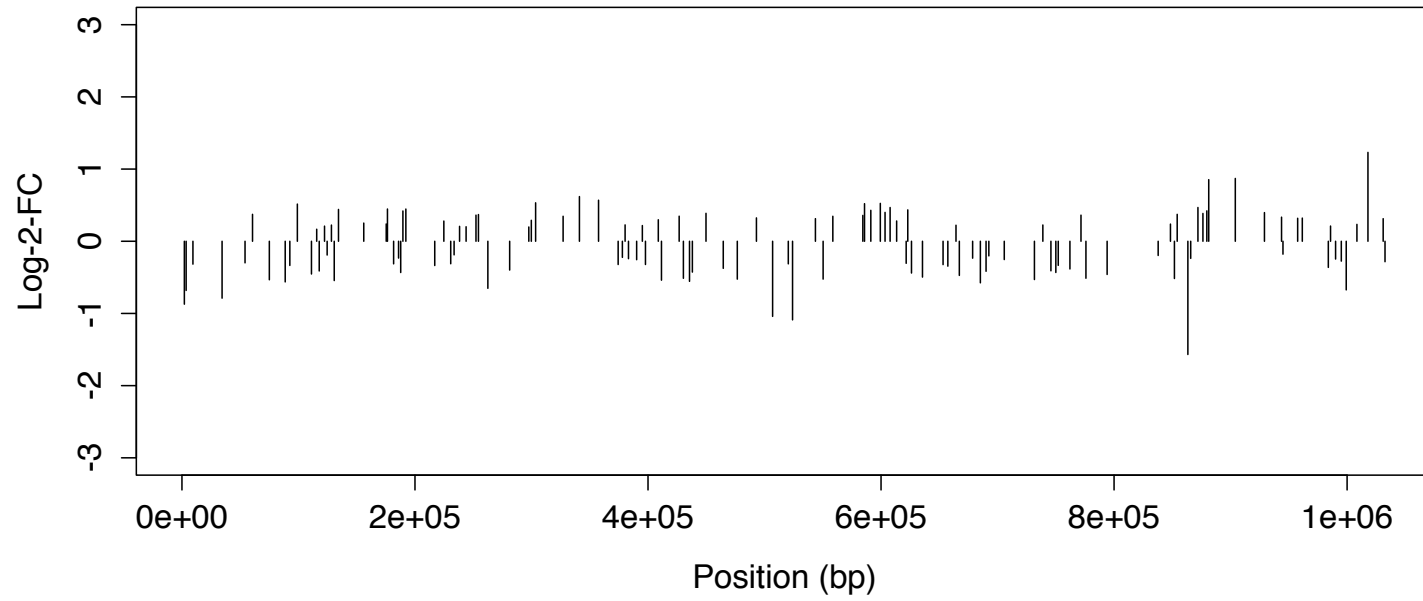

### Chromosome 26

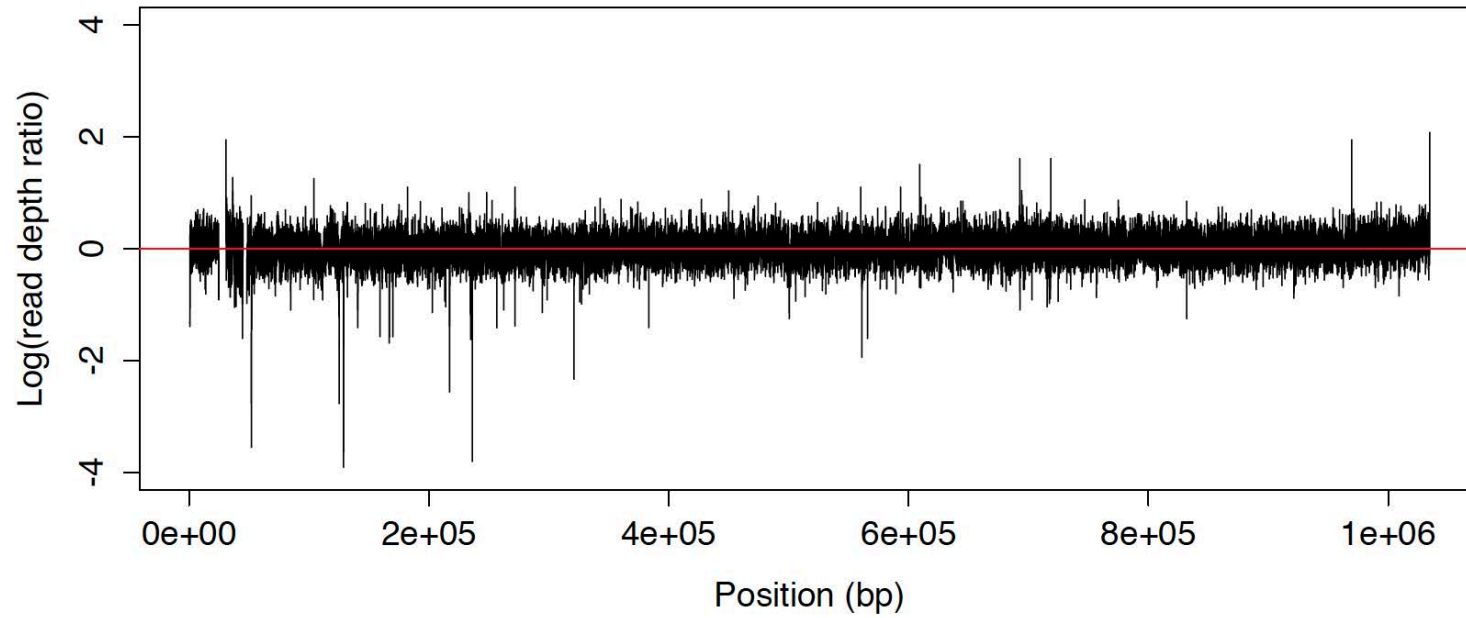

### Chromosome 27

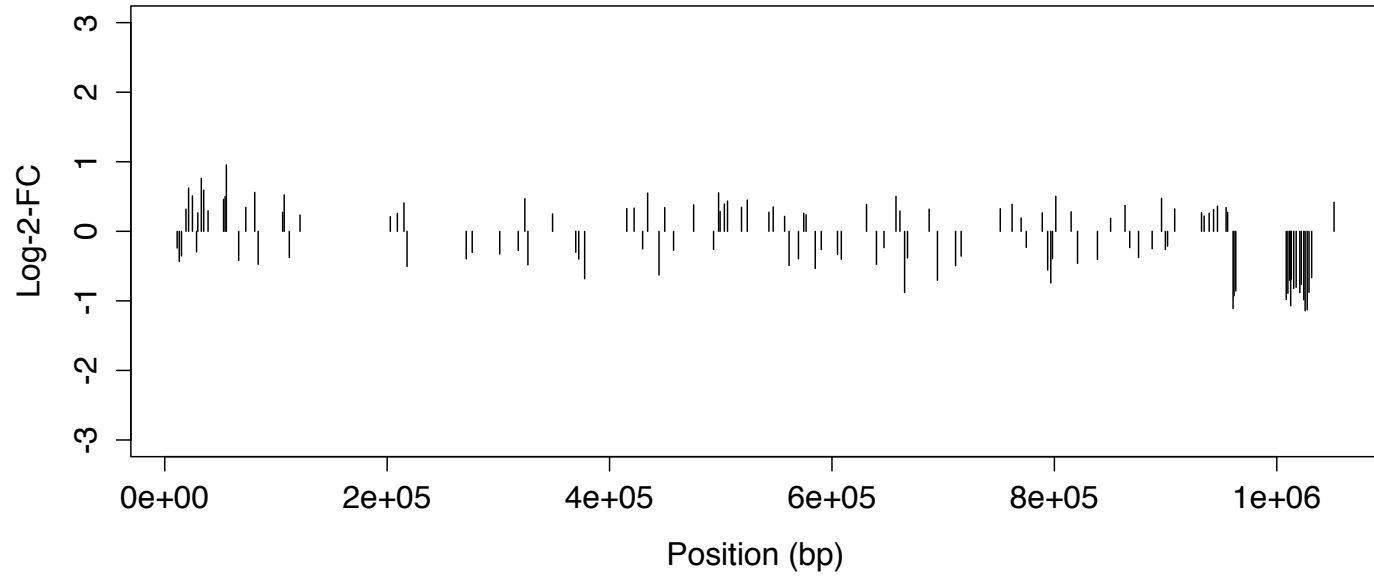

### Chromosome 27

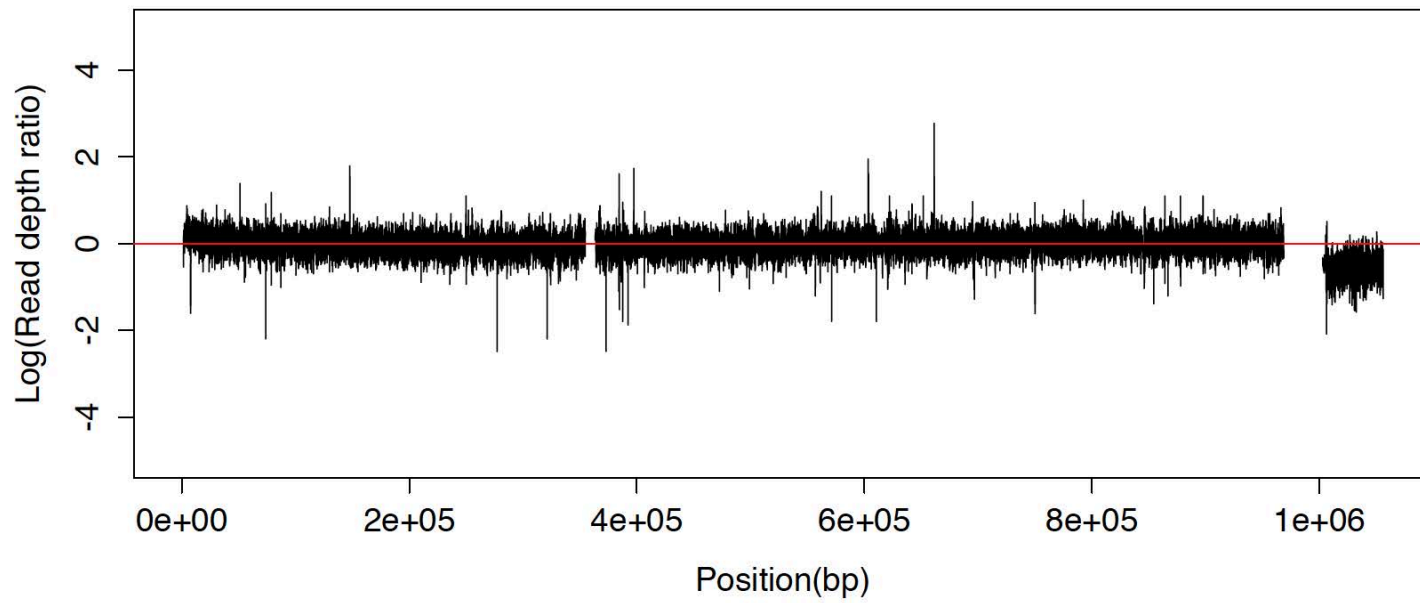

### Chromosome 28

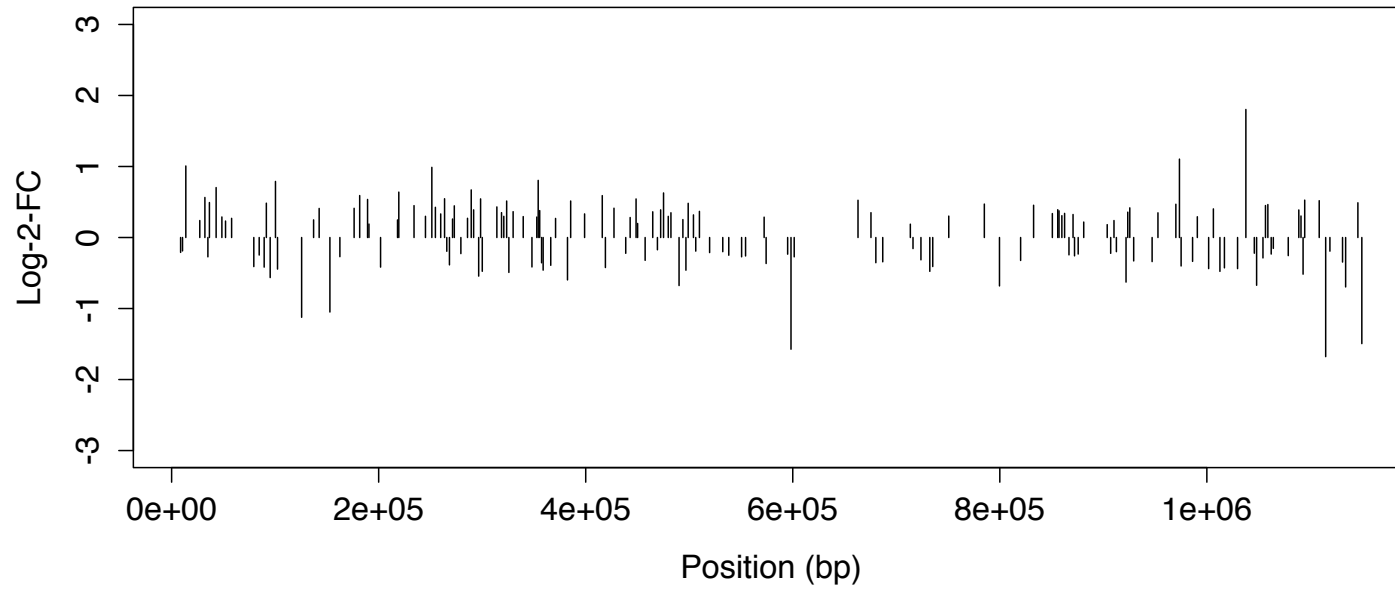

### Chromosome 28

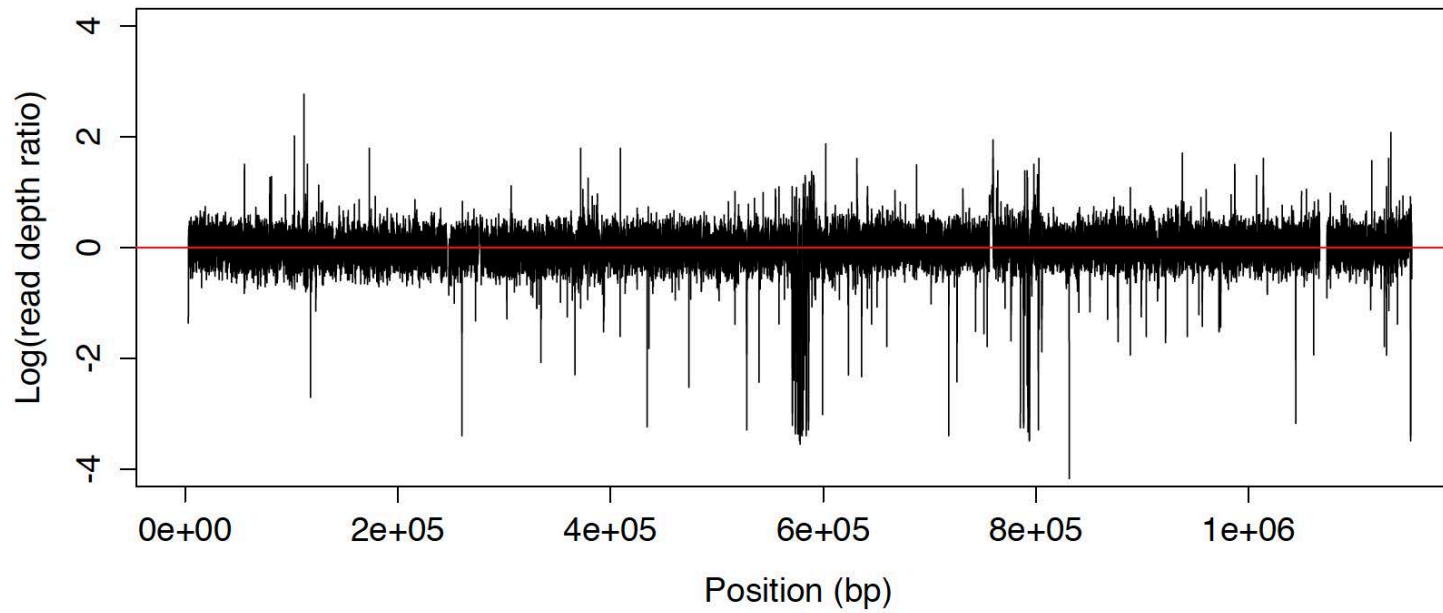

### Chromosome 29

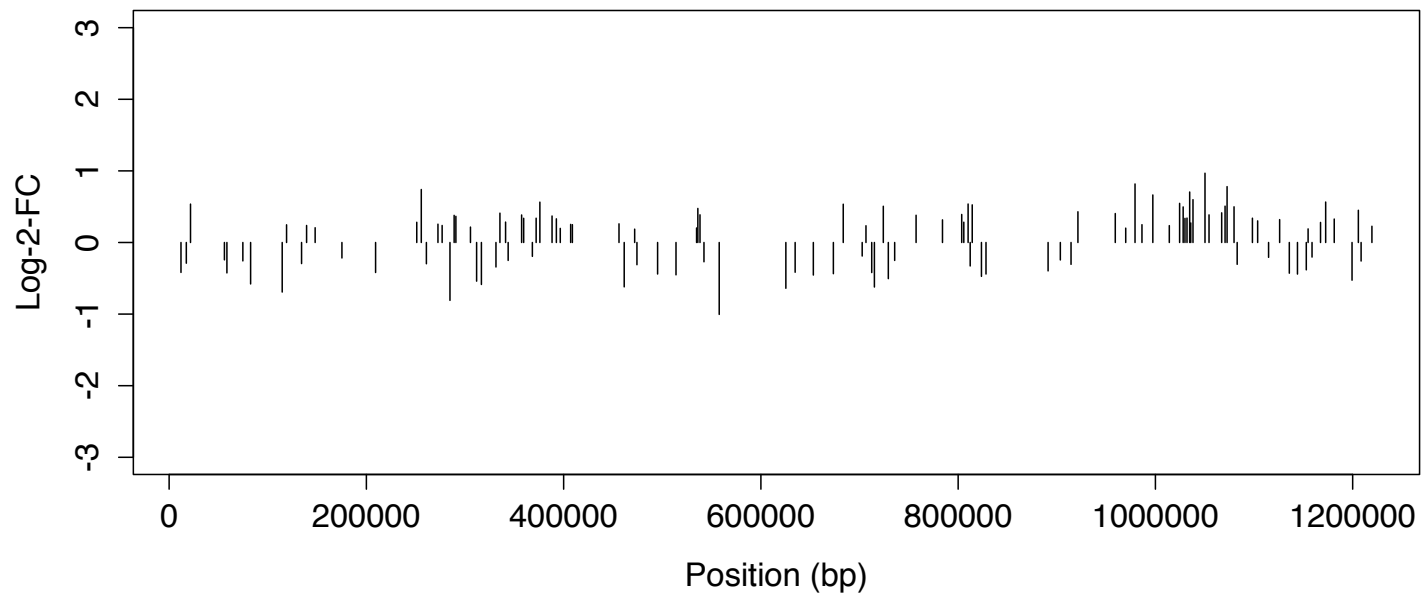

### Chromosome 29

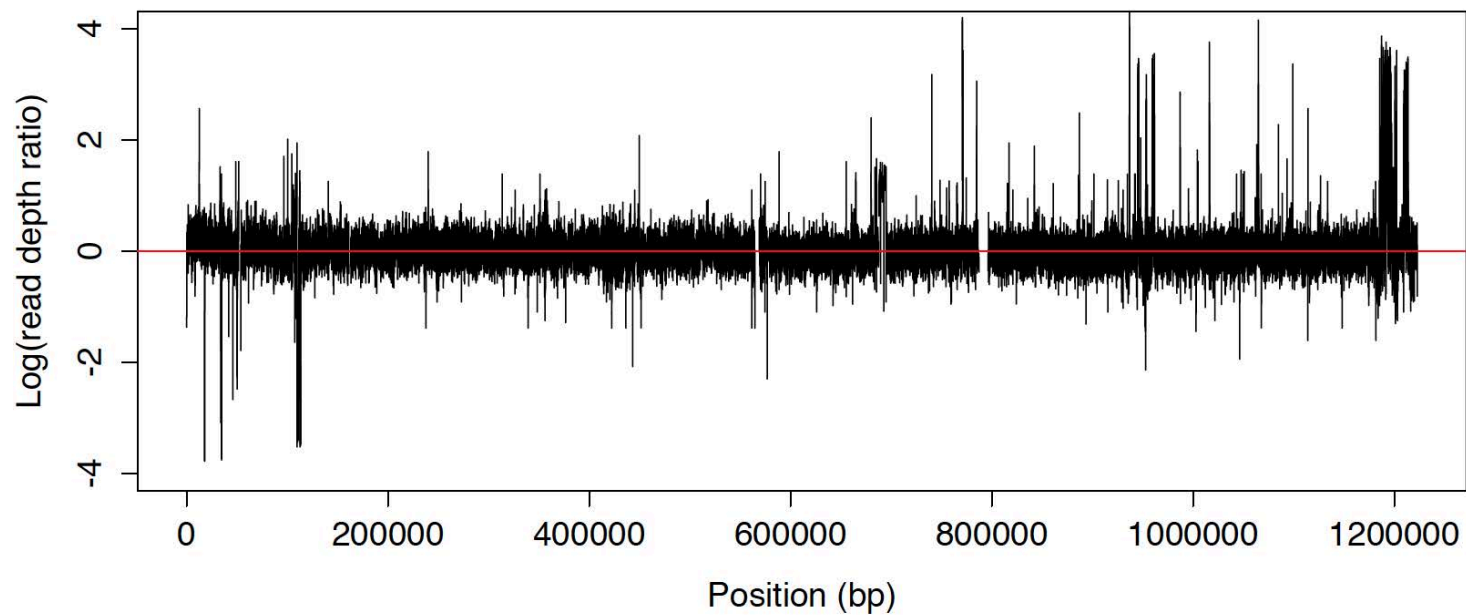

### Chromosome 30

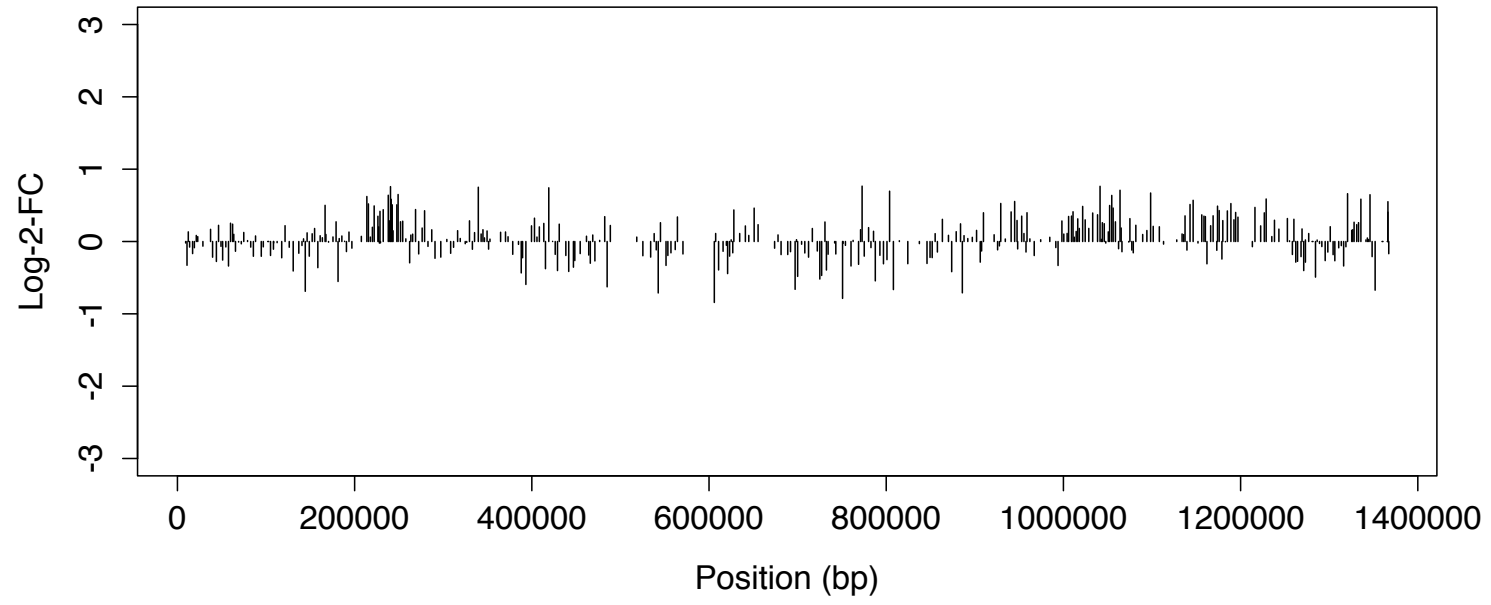

### Chromosome 30

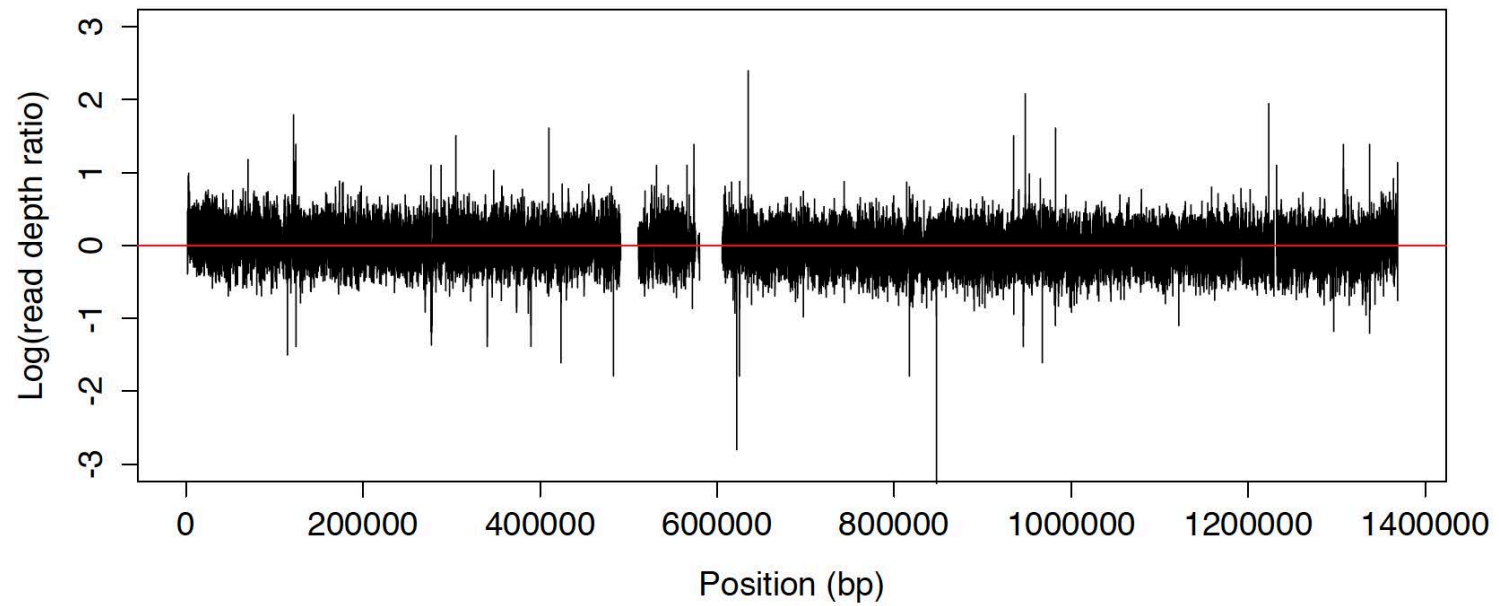

### Chromosome 31

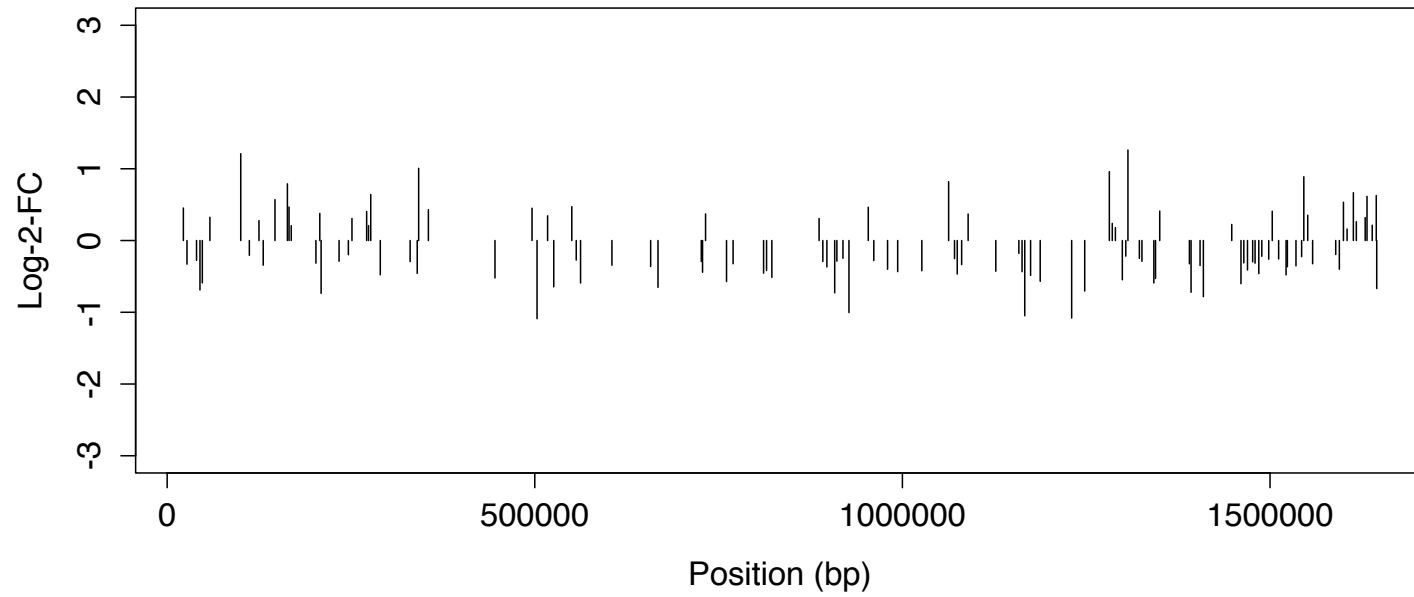

### Chromosome 31

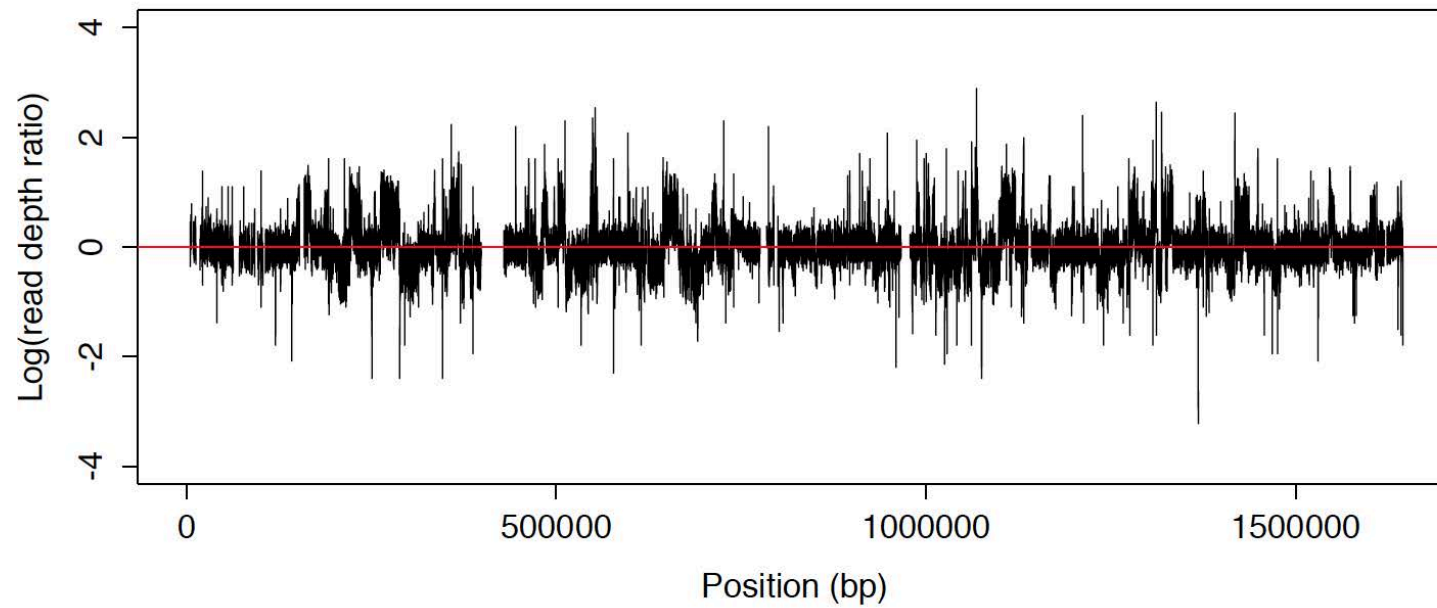

### Chromosome 32

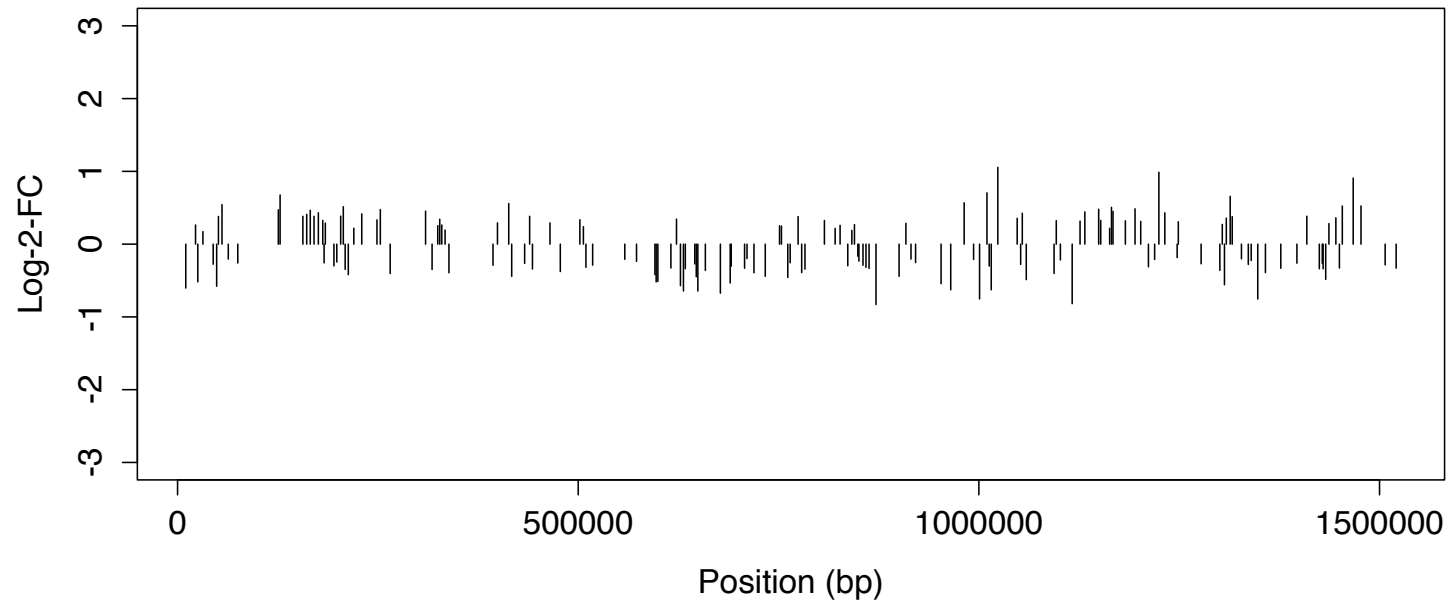

### Chromosome 32

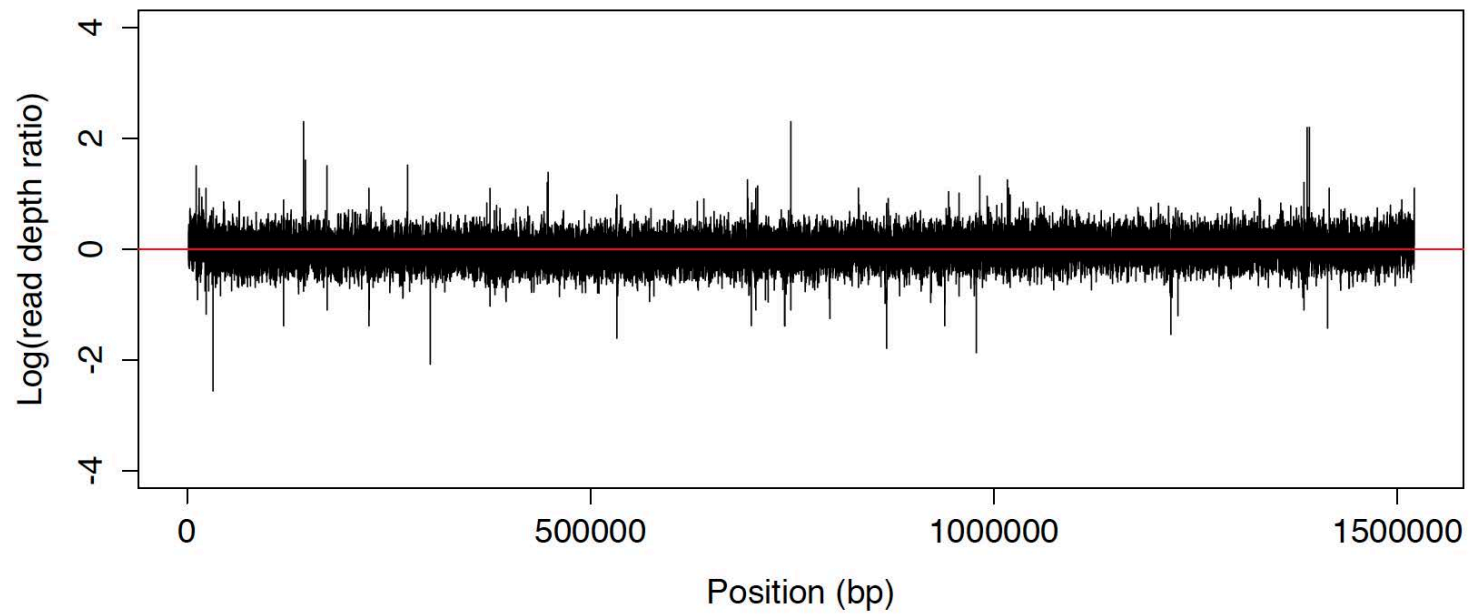



### Chromosome 33

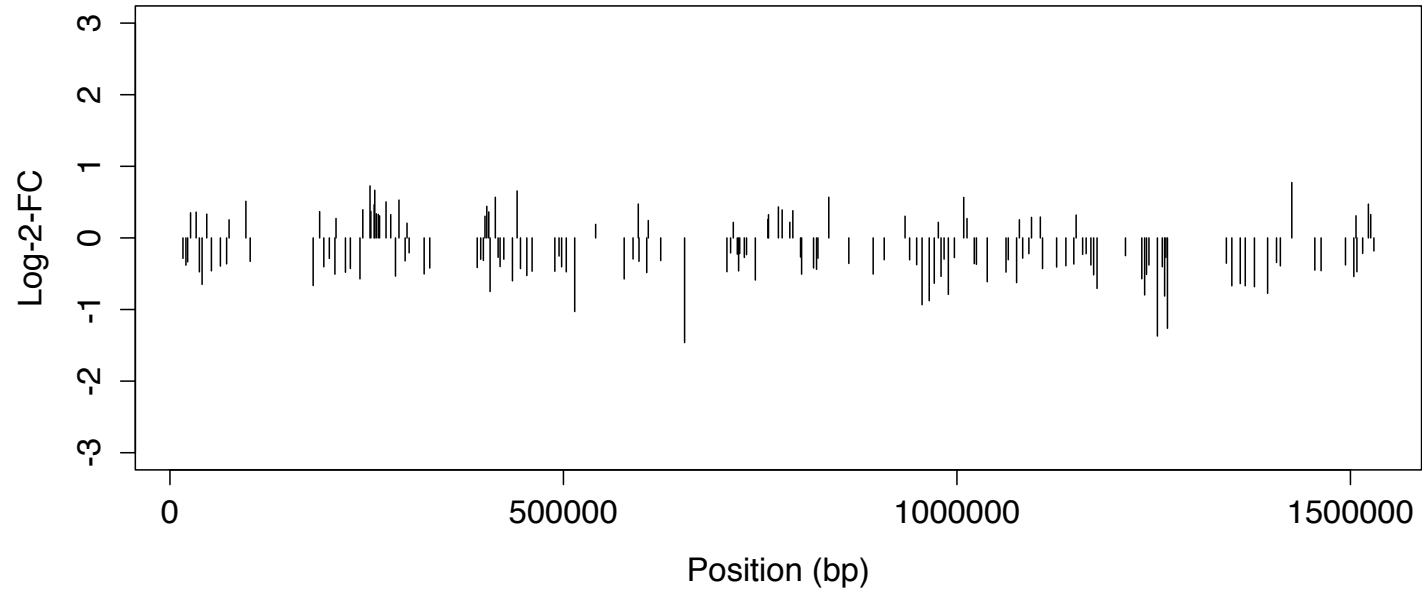

### Chromosome 33

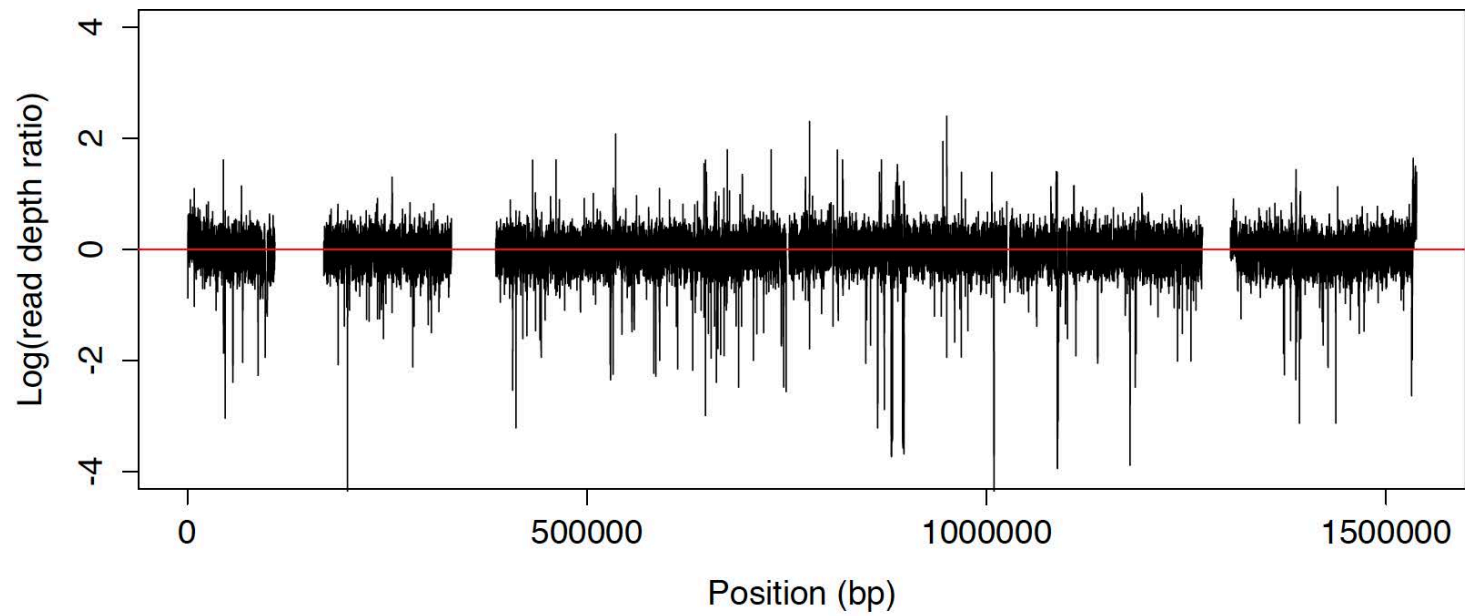

### Chromosome 34

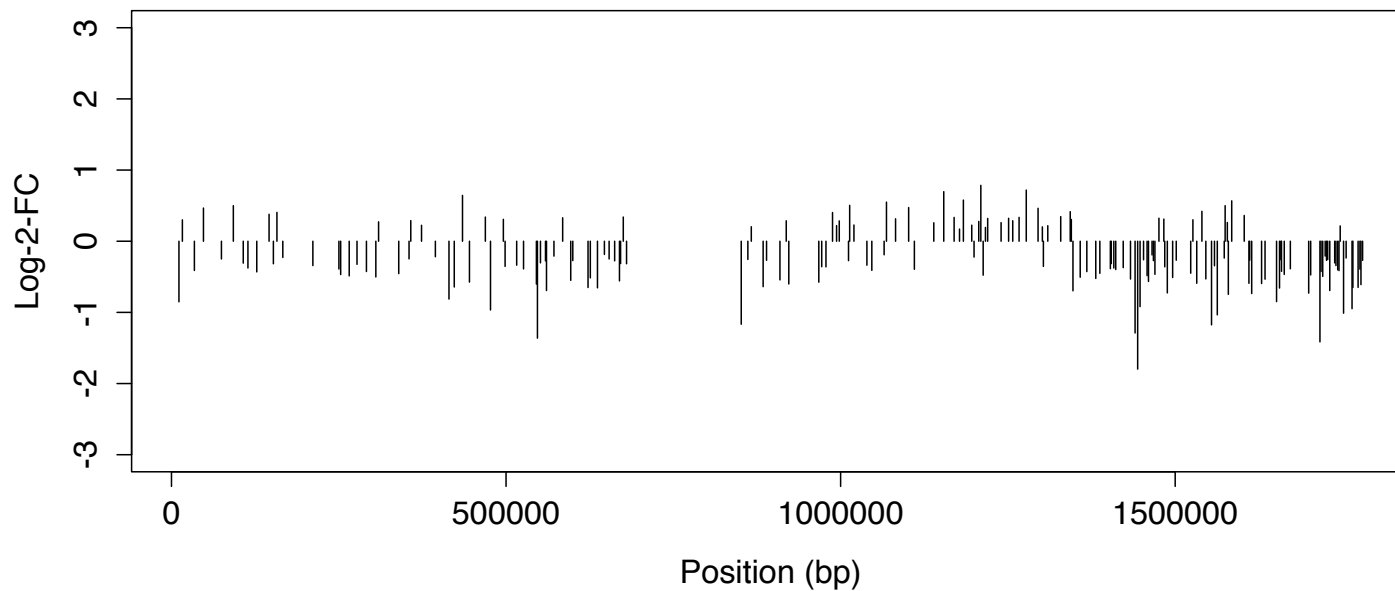

### Chromosome 34

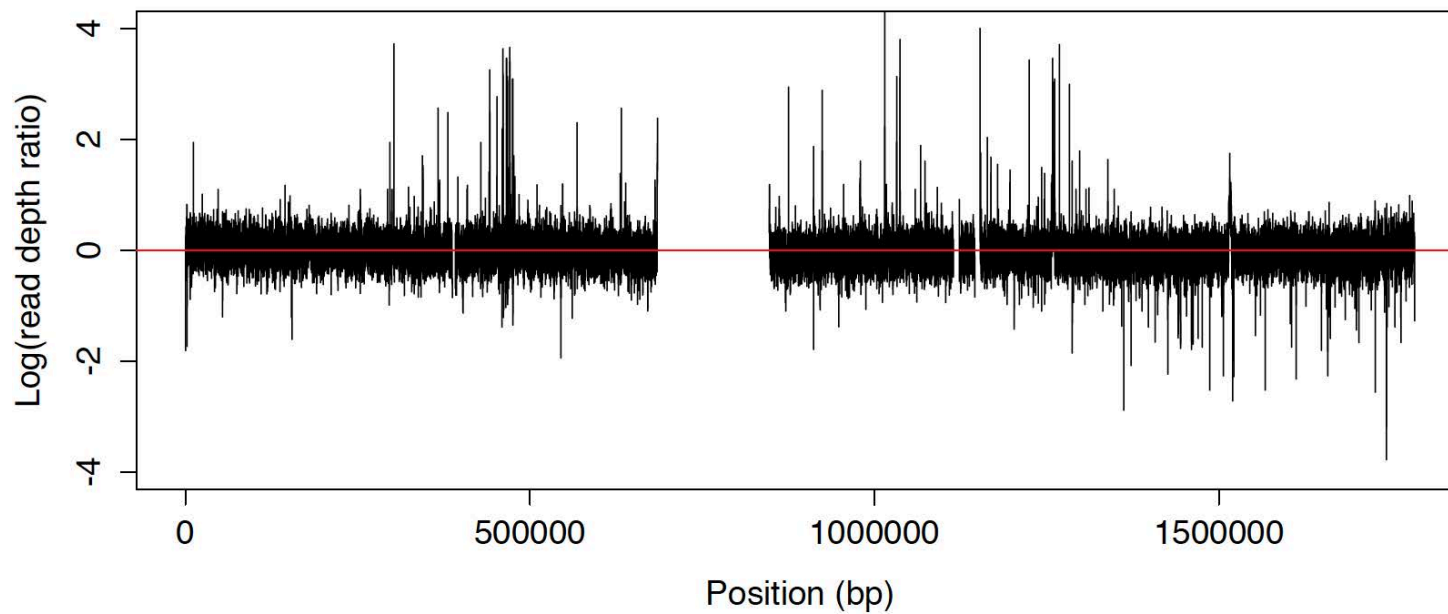

### Chromosome 35

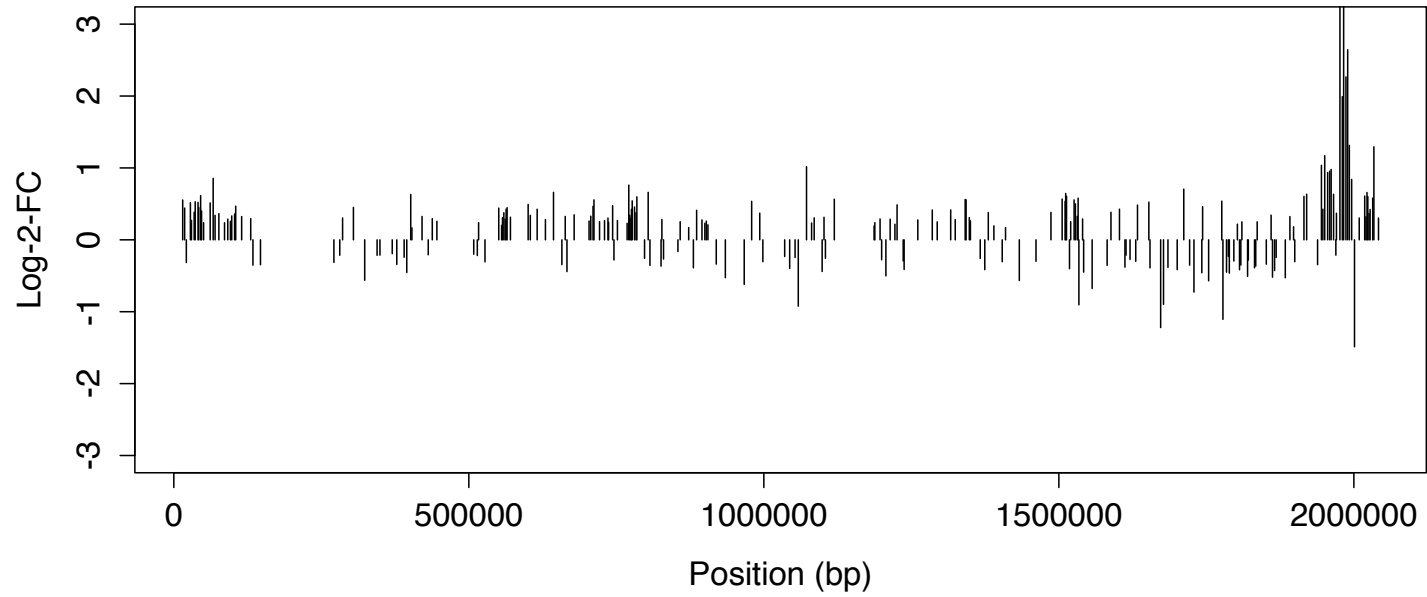

### Chromosome 35

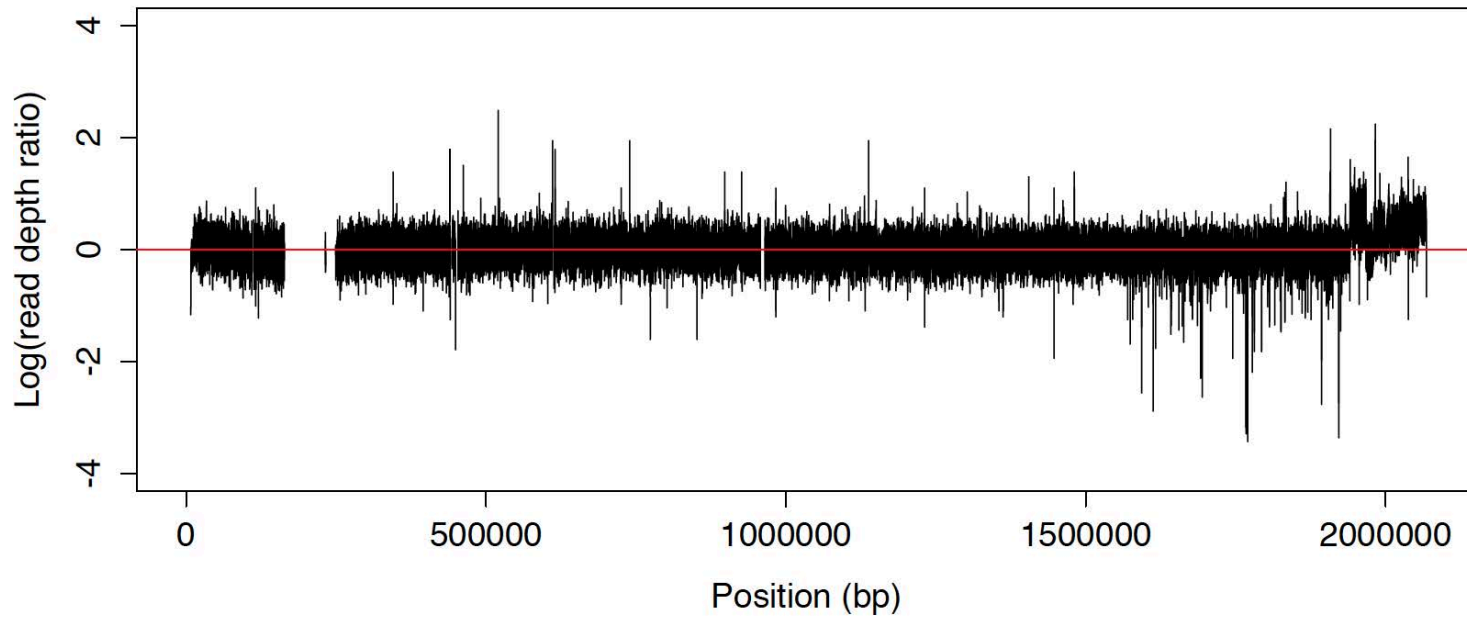

### Chromosome 36

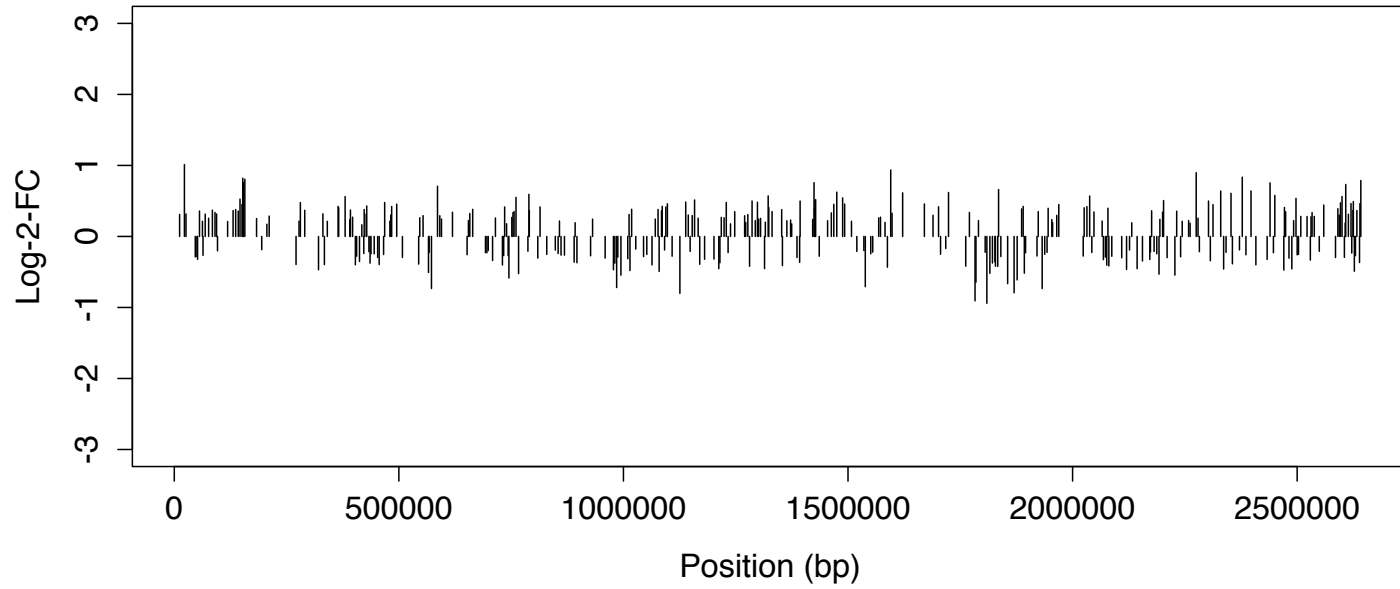

### Chromosome 36

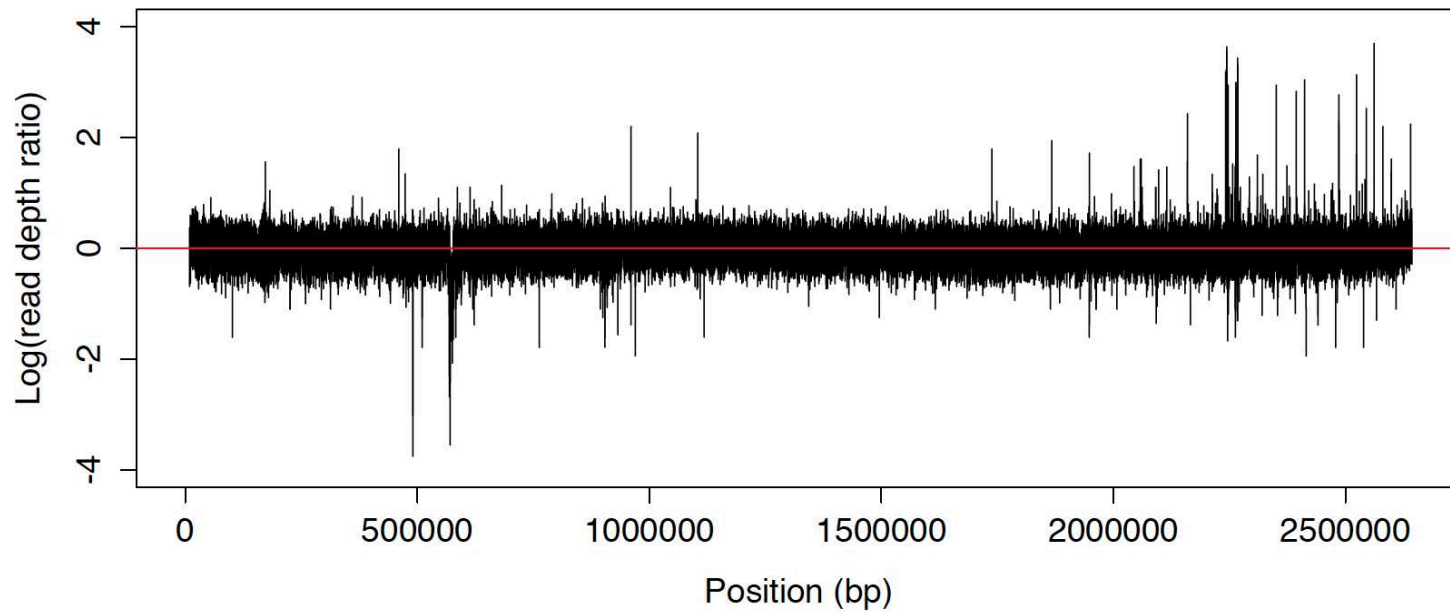

Supplement: mbo004173477sf3.pdf [file mbo004173477sf3.pdf]
