# Supplementary material
Source: PubMed Central journal article supplement (PMC5596349)
Supplement: mbo004173477st2.pdf [file mbo004173477st2.pdf]

| Name                                 | Product                             | Mean VSE value |
|--------------------------------------|-------------------------------------|----------------|
| LmjF.21.1860                         | Beta-tubulin                        | 16.49281       |
| LmjF.36.1940                         | Inosine-guanosine transporter (†    | 15.19757       |
| LmjF.15.1230                         | 60S ribosomal protein L5            | 14.56573       |
| LmjF.15.1240                         | Nucleoside transporter 1 (NT1)      | 14.48194       |
| LmjF.35.1890                         | Nucleoside transporter 1 (NT1)      | 14.47303       |
| LmjF.32.2660                         | Amino acid transporter 19 (AAT1     | 13.96825       |
| LmjF.21.0915                         | Glucose transporter (GT1)           | 13.92063       |
| LmjF.25.0720                         | Histone H2A                         | 13.87723       |
| LmjF.11.0970                         | Superoxide dismutase                | 13.89376       |
| LmjF.32.3130                         | Amino acid transporter AATP11       | 13.92224       |
| LmjF.13.0450                         | Pteridine transporter (PT1)         | 13.71295       |
| LmjF.31.0350                         | Carboxypeptidase                    | 13.45672       |
| LmjF.36.6300                         | Cyclophilin A (CYPA)                | 13.63217       |
| LmjF.22.0420                         | ATP synthase F1, alpha subunit (    | 13.73937       |
| LmjF.32.3900                         | Eukaryotic initiation factor 5a (Ei | 13.69314       |
| LmjF.35.0240                         | 40S ribosomal protein S5            | 13.62154       |
| LmjF.32.0750                         | Ribosomal protein L3                | 13.63639       |
| LmjF.06.1260                         | Enolase (ENO)                       | 13.38967       |
| LmjF.36.0980                         | 60S ribosomal protein L23a          | 13.68028       |
| LmjF.14.1160                         | 40S ribosomal protein S17           | 13.49239       |
| LmjF.24.2070                         | 40S ribosomal protein S12           | 13.53216       |
| LmjF.27.1380                         | 40S ribosomal protein S8            | 13.49671       |
| LmjF.05.0500                         | Nuclear RNA binding domain prc      | 13.36715       |
| LmjF.25.0910                         | ALBA-domain prtein 1 (ALBA1)        | 13.27298       |
| LmjF.13.0570                         | 60S ribosomal protein P0            | 13.42474       |
| LmjF.28.2555                         | Unknown                             | 13.37038       |
| LmjF.06.0570                         | 40S ribosomal protein S10           | 13.38254       |
| LmjF.27.1245                         | 60S ribosomal protein L2            | 13.19806       |
| LmjF.36.1260                         | 40S ribosomal protein S15           | 13.08369       |
| LmjF.07.1160                         | Unknown                             | 12.6233        |
| VSE = variance stabilized expression |                                     |                |
