# Supplementary material
Source: PubMed Central journal article supplement (PMC5596349)
Supplement: mbo004173477st3.pdf [file mbo004173477st3.pdf]

| Name         | Log-FC    | Product                                                |
|--------------|-----------|--------------------------------------------------------|
| LmjF.04.0310 | 4.504471  | Beta-fructosfuranosidase, putative                     |
| LmjF.04.0320 | 2.803461  | Beta-fructosfuranosidase, putative                     |
| LmjF.04.1050 | 10.166191 | Acyltransfrase-like protein, copy 2                    |
| LmjF.17.0086 | 5.905615  | Elongation factor 1 alpha                              |
| LmjF.17.0740 | 2.204168  | Transmembrane hypothetical protein                     |
| LmjF.18.0740 | 2.051167  | Unknown                                                |
| LmjF.19.1315 | 2.071251  | Unknown                                                |
| LmjF.26.0640 | 2.079563  | Heat shock protein, putative                           |
| LmjF.30.2460 | 2.652163  | Heat shock 70 related protein                          |
| LmjF.30.2480 | 2.283332  | Heat shock 70 related protein                          |
| LmjF.32.1390 | 2.034566  | Hypothetical protein                                   |
| LmjF.33.1630 | 2.109015  | Cyclophilin 4, putative                                |
| LmjF.35.0450 | 9.783333  | Hypothetical protein                                   |
| LmjF.03.0010 | -2.12657  | Hypothetical protein                                   |
| LmjF.04.1210 | -2.304256 | Casein kinase I, putative                              |
| LmjF.10.0980 | -2.045308 | Unknown                                                |
| LmjF.13.0100 | -2.762821 | Unknown                                                |
| LmjF.16.0480 | -2.393312 | Fucose kinase, putative                                |
| LmjF.17.0190 | -2.465631 | Receptor-type adenylate cyclase, putative              |
| LmjF.22.0750 | -2.385516 | CCCH-type zinc finger hypothetical protein             |
| LmjF.23.1665 | -2.347762 | Phosphatidic acid phosphatase type 2, putative         |
| LmjF.25.1730 | -2.127229 | Signal-peptide containing hypothetical protein         |
| LmjF.26.2680 | -2.394075 | Excreted hypothetical protein                          |
| LmjF.28.0080 | -2.039885 | Unknown                                                |
| LmjF.28.0570 | -2.072177 | Unknown                                                |
| LmjF.28.0980 | -2.143707 | Unknown                                                |
| LmjF.28.1570 | -2.362917 | Hydrolase alpha/beta fold family, putative             |
| LmjF.28.2660 | -2.423292 | Hypothetical methionine sulphoxide reductase B protein |
| LmjF.31.2100 | -2.609649 | Hypothetical protein                                   |
| LmjF.31.2440 | -2.033572 | Unknown                                                |
| LmjF.31.2460 | -2.155336 | Lipase, putative                                       |
| LmjF.33.0520 | -2.59296  | D-xylulose reductase, putative                         |
| LmjF.33.2180 | -2.181136 | Unknown                                                |
| LmjF.34.3250 | -2.069874 | Unknown                                                |
| LmjF.35.0710 | -2.235743 | Nuclease-like hypothetical protein                     |
| LmjF.35.2810 | -2.08753  | Unknown                                                |
| LmjF.35.4210 | -2.070975 | Unknown                                                |
| LmjF.35.5030 | -2.617677 | Unknown                                                |
| LmjF.36.2760 | -2.712158 | MFS general substrate transporter protein, putative    |
| LmjF.36.3530 | -2.299259 | Unknown                                                |
