# Supplementary material
Source: PubMed Central journal article supplement (PMC5596349)
Supplement: mbo004173477st4.pdf [file mbo004173477st4.pdf]

| <b>Name</b>                    | <b>Product</b>                                 | <b>Transmembrane</b> |
|--------------------------------|------------------------------------------------|----------------------|
| LmjF.35.0450                   | Hypothetical protein, unknown function         | No                   |
| LmjF.10.0385                   | Folate/biopterin transporter (FT1)             | Yes                  |
| LmjF.34.1080                   | Amastin-like surface protein                   | Yes                  |
| LmjF.35.5030                   | Hypothetical protein, unknown function         | No                   |
| LmjF.23.0260                   | Argininosuccinate synthase                     | No                   |
| LmjF.29.2220                   | Hypothetical protein, unknown function         | No                   |
| LmjF.33.0290                   | Glucose transporter (D2)                       | Yes                  |
| LmjF.31.0350                   | Amino acid transporter AATP11 (AAT1.4)         | Yes                  |
| LmjF.11.0680                   | Hypothetical MFS transporter                   | Yes                  |
| LmjF.28.2650                   | Membrane-bound acid phosphatase                | Yes                  |
| LmjF.35.5150                   | Biopterin transporter (BT1)                    | Yes                  |
| LmjF.11.0980                   | HIT zinc finger protein                        | No                   |
| LmjF.26.2280                   | Nitrilase                                      | No                   |
| LmjF.36.1940                   | Inosine-guanosine transporter (NT2)            | Yes                  |
| LmjF.31.0680                   | C2 domain containing protein                   | No                   |
| LmjF.31.2660                   | Glutamamyl carboxypeptidase                    | No                   |
| LmjF.35.5170                   | Hypothetical nucleoside triphosphate hydrolase | No                   |
| LmjF.12.0390                   | Hypothetical protein, unknown function         | No                   |
| LmjF.24.1040                   | Hypothetical protein, unknown function         | No                   |
| LmjF.35.5120                   | Hypothetical protein, unknown function         | No                   |
| LmjF.35.5160                   | Hypothetical nucleoside triphosphate hydrolase | No                   |
| LmjF.35.5140                   | Hypothetical methyltransferase                 | No                   |
| LmjF.24.1030                   | Dynein light chain                             | No                   |
| LmjF.24.1090                   | Hypothetical multipass transmembrane protein   | Yes                  |
| LmjF.24.1010                   | MND1 domain protein                            | No                   |
| LmjF.24.1020                   | Galactose oxidase-like protein                 | No                   |
| LmjF.24.1050                   | SNF2-related protein                           | No                   |
| LmjF.24.1080                   | DNAJ domain heat shock protein                 | No                   |
| LmjF.24.1100                   | Pre-mRNA splicing factor                       | No                   |
| LmjF.24.1060                   | AKAP7 RNA ligase-like protein                  | No                   |
| Total of 9 transmembrane genes |                                                |                      |
