# Supplementary material
Source: PubMed Central journal article supplement (PMC5596349)
Supplement: mbo004173477st5.pdf [file mbo004173477st5.pdf]

| Name         | CNV         | Gene product                                         | TM  | DE  |
|--------------|-------------|------------------------------------------------------|-----|-----|
| LmjF.23.0210 | CNVR240     | ABCC1 transporter                                    | Yes | Yes |
| LmjF.23.0223 | CNVR240     | Hypothetical transmembrane protein                   | Yes | No  |
| LmjF.23.0225 | CNVR240     | Hypothetical transmembrane protein                   | Yes | Yes |
| LmjF.23.0230 | CNVR240     | Hypothetical transmembrane protein                   | Yes | Yes |
| LmjF.23.0240 | CNVR240     | Terbinafine resistance locus 1 (YIP1)                | Yes | No  |
| LmjF.23.0250 | CNVR240     | ABC-thiol transporter (MRPA)                         | Yes | No  |
| LmjF.23.0260 | CNVR240     | Argininosuccinate synthase                           | No  | Yes |
| LmjF.23.0270 | CNVR240     | Pteridine reductase 1                                | No  | Yes |
| LmjF.23.0280 | CNVR240     | Zinc finger, C3HC4 type                              | No  | Yes |
| LmjF.23.0290 | CNVR240     | Checkpoint protein HUS1                              | Yes | Yes |
| LmjF.23.0300 | CNVR240     | Tryptophanyl-tRNA synthetase                         | No  | Yes |
| LmjF.23.0310 | CNVR240     | Hypothetical nucleoside triphosphate hydrolase       | No  | Yes |
| LmjF.23.0320 | CNVR240     | Hypothetical protein                                 | No  | No  |
| LmjF.23.0330 | CNVR240     | Hypothetical transmembrane protein                   | Yes | Yes |
| LmjF.23.0340 | CNVR240     | (H <sup>+</sup> )-ATPase G subunit, putative         | No  | Yes |
| LmjF.24.1010 | CNVR114     | Hypothetical protein                                 | No  | Yes |
| LmjF.24.1020 | CNVR114     | F-box domain/Galactose oxidase protein               | No  | Yes |
| LmjF.24.1030 | CNVR114     | Dynein light chain                                   | No  | Yes |
| LmjF.24.1040 | CNVR114     | Hypothetical protein                                 | No  | Yes |
| LmjF.24.1050 | CNVR114     | SNF2 family protein                                  | No  | Yes |
| LmjF.24.1060 | CNVR114     | AKAP7 2'5' RNA ligase-like domain containing protein | No  | Yes |
| LmjF.24.1070 | CNVR114     | Hypothetical protein                                 | No  | Yes |
| LmjF.24.1080 | CNVR114     | DNAJ domain protei                                   | Yes | Yes |
| LmjF.24.1090 | CNVR114     | Predicted multipass transmembrane protein            | Yes | Yes |
| LmjF.24.1100 | CNVR114     | pre-mRNA-splicing factor ATP-dependent RNA helicase  | No  | Yes |
| LmjF.11.0080 | CNVR181     | Hypothetical protein                                 | No  | Yes |
| LmjF.11.0090 | CNVR181     | MORN repeat, putative                                | No  | Yes |
| LmjF.11.0100 | CNVR181     | Seryl-tRNA synthetase                                | No  | Yes |
| LmjF.11.0110 | CNVR181     | CDC2-related kinase 8                                | No  | Yes |
| LmjF.11.0120 | CNVR181     | Hypothetical protein                                 | No  | Yes |
| LmjF.11.0130 | CNVR181     | NGG1 interacting factor 3-like protein               | No  | Yes |
| LmjF.11.0140 | CNVR181     | Cell cycle sequence binding phosphoprotein (RBP45)   | No  | Yes |
| LmjF.11.0150 | CNVR181     | Hypothetical protein                                 | No  | Yes |
| LmjF.11.0160 | CNVR181     | Hypothetical protein                                 | No  | Yes |
| LmjF.11.0170 | CNVR181     | Myotubularin-associated protein                      | No  | Yes |
| LmjF.11.0180 | CNVR181     | Cytoplasmic translation machinery associated protein | No  | Yes |
| LmjF.27.2340 | CNVR159-178 | Sucrose hydrolase-like protein                       | No  | No  |
| LmjF.27.2350 | CNVR159-178 | Vesicle-associated membrane protein 7                | Yes | Yes |
| LmjF.27.2360 | CNVR159-178 | Hypothetical protein                                 | No  | Yes |
| LmjF.27.2370 | CNVR159-178 | Hypothetical transmembrane protein                   | Yes | Yes |
| LmjF.27.2380 | CNVR159-178 | Hypothetical transmembrane protein                   | Yes | Yes |

|                                                                             |             |                                      |    |     |
|-----------------------------------------------------------------------------|-------------|--------------------------------------|----|-----|
| LmjF.27.2390                                                                | CNVR159-178 | TPR-repeat protein                   | No | Yes |
| LmjF.27.2400                                                                | CNVR159-178 | Heat shock protein DNAJ              | No | Yes |
| LmjF.27.2410                                                                | CNVR159-178 | Aldo-keto reductase-like protein     | No | Yes |
| LmjF.27.2420                                                                | CNVR159-178 | Hypothetical protein                 | No | Yes |
| LmjF.27.2430                                                                | CNVR159-178 | Hypothetical protein                 | No | Yes |
| LmjF.27.2450                                                                | CNVR159-178 | Hypothetical protein                 | No | Yes |
| LmjF.27.2460                                                                | CNVR159-178 | Putative protein kinase              | No | Yes |
| LmjF.27.2470                                                                | CNVR159-178 | Putative protein kinase              | No | Yes |
| LmjF.27.2480                                                                | CNVR159-178 | WD-repeat protein                    | No | Yes |
| LmjF.27.2490                                                                | CNVR159-178 | Tubulin-tyrosine ligase-like protein | No | Yes |
| LmjF.27.2590                                                                | CNVR159-178 | Dynein heavy chain                   | No | No  |
| Total genes: 11 in CNVR240, 10 in CNVR114, 11 in CNVR181, 14 in CNVR159-178 |             |                                      |    |     |
| Total genes: 52, Transmembrane: 12, Differentially expressed: 46            |             |                                      |    |     |
