# Supplementary material
Source: PubMed Central journal article supplement (PMC5596349)

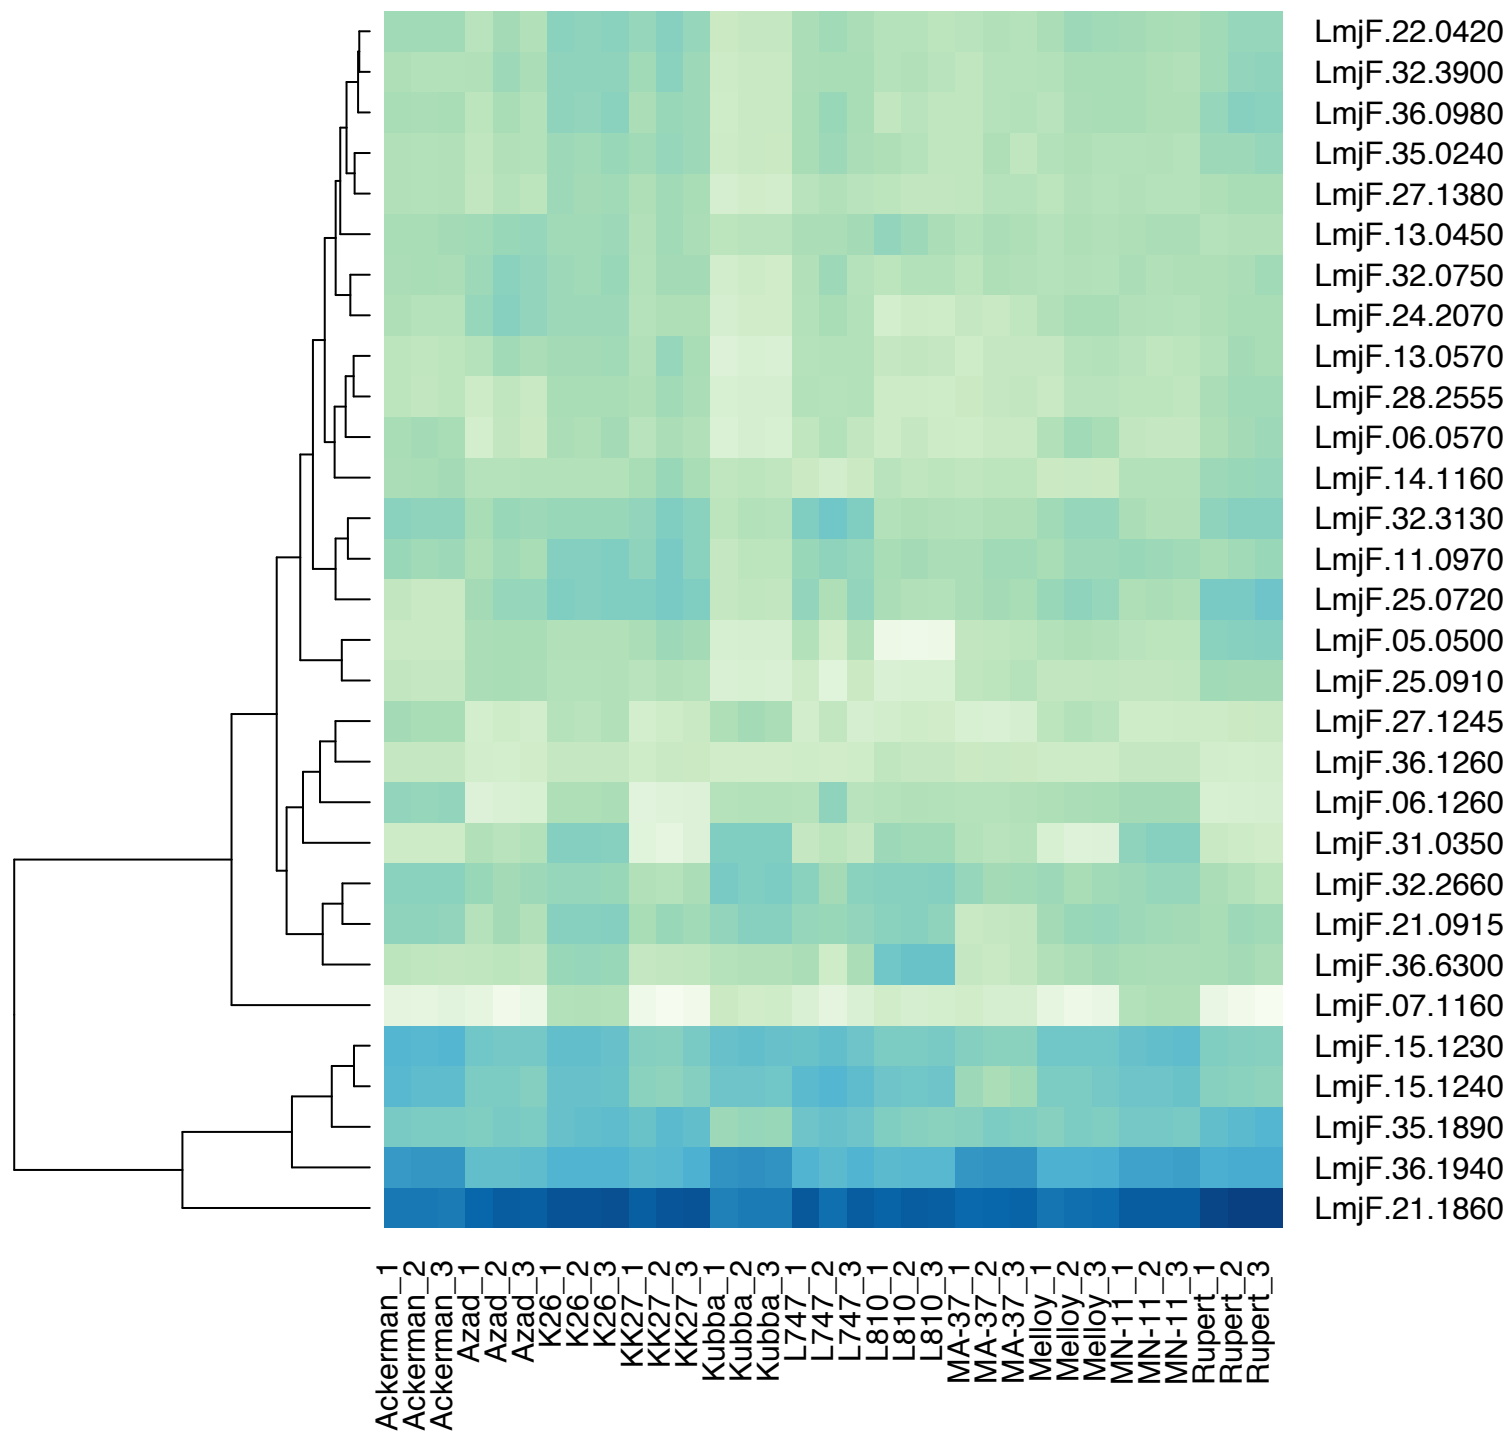

Supplement: mbo004173477sf1.pdf [file mbo004173477sf1.pdf]

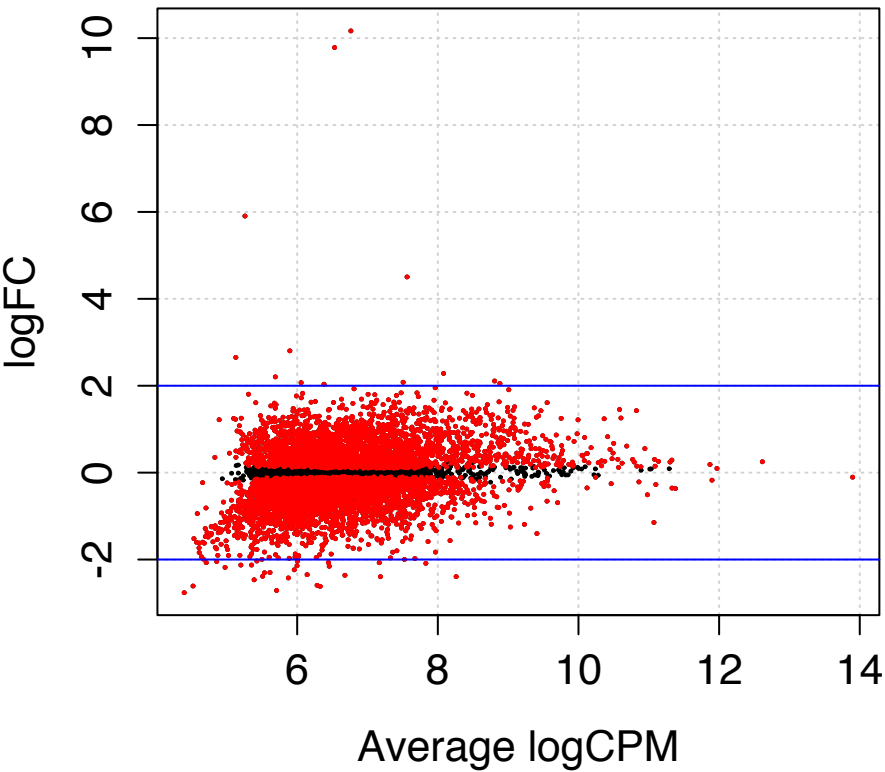

Supplement: mbo004173477sf2.pdf [file mbo004173477sf2.pdf]

**LmjF.10.0385**

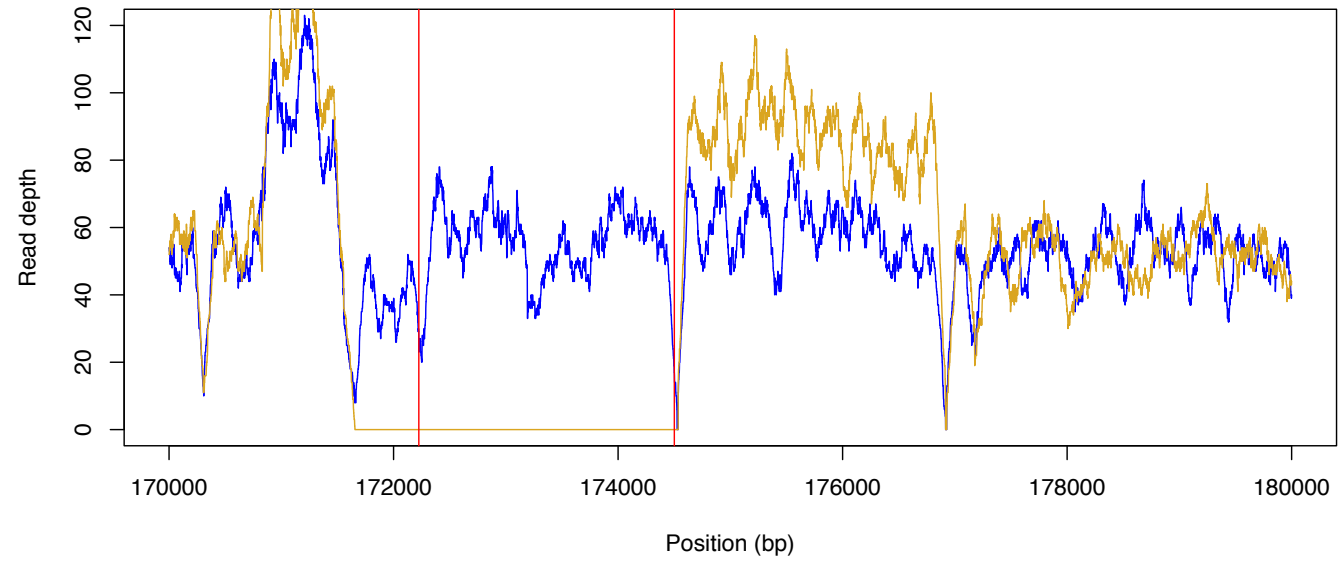

**LmjF.35.5150**

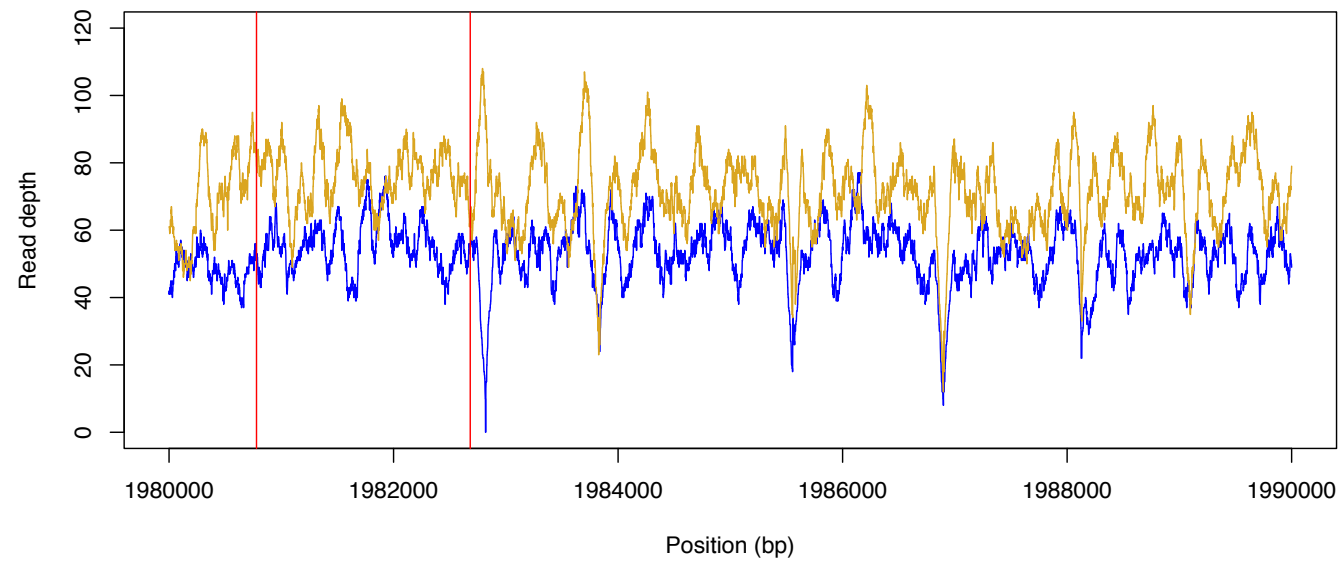

Supplement: mbo004173477sf4.pdf [file mbo004173477sf4.pdf]
